# Supplementary material
Source: publisher figshare collection journal article supplement (https://tandf.figshare.com/ndownloader/files/22669601)
Supplement: Supplementary file 1 [file 22669601]

SUPPLEMENTAL TABLES

Paper:

**“One-tailed asymptotic inferences for the relative risk: a comparison of 63 inference methods”** **by *Martín Andrés A, Álvarez Hernández M and Herranz Tejedor, I.* (2020)**

**Table 2 (complete). Increase in the error (first entry) and percentage of points in the CR (second entry) for the 63 methods analyzed (α=5%). The values in bold type indicate that the method “failed”**

| *ρ* | (*n*1,*n*2) | ZW0 | | ZW1 | | ZW2 | | ZW3 | | ZW4 | | (*n1* ,*n2*) | ZW0 | | ZW1 | | ZW2 | | ZW3 | | ZW4 | |
| --- | --- | --- | --- | --- | --- | --- | --- | --- | --- | --- | --- | --- | --- | --- | --- | --- | --- | --- | --- | --- | --- | --- |
| 0.05 | (80,80) | 3.10 | 92.27 | 1.56 | 92.84 | 0.34 | 93.40 | 0.34 | 93.02 | 0.34 | 93.02 | (100,120) | 2.59 | 93.61 | 1.16 | 93.99 | 0.11 | 94.37 | 1.16 | 94.11 | 1.16 | 94.11 |
| 0.1 |  | 2.28 | 88.90 | 0.75 | 89.47 | -0.38 | 89.97 | -0.38 | 89.67 | -0.38 | 89.67 |  | 1.90 | 90.38 | 0.74 | 90.74 | -0.31 | 91.10 | -0.31 | 90.86 | -0.31 | 90.86 |
| 0.2 |  | 1.12 | 82.81 | 0.44 | 83.25 | -1.60 | 83.69 | -0.05 | 83.40 | -0.05 | 83.40 |  | 0.30 | 84.36 | 0.30 | 84.64 | -0.68 | 84.95 | 0.00 | 84.77 | 0.00 | 84.77 |
| 0.5 |  | -0.35 | 65.90 | -0.61 | 66.16 | **-2.28** | 66.36 | -0.74 | 66.22 | -0.74 | 66.21 |  | -1.02 | 67.56 | -1.02 | 67.73 | -1.40 | 67.87 | -1.02 | 67.78 | -1.02 | 67.77 |
| 0.8 |  | **-2.20** | 50.18 | -1.20 | 50.16 | -1.20 | 50.19 | -1.20 | 50.16 | -1.20 | 50.13 |  | -1.61 | 51.62 | **-2.05** | 51.65 | **-2.05** | 51.65 | **-2.05** | 51.66 | **-2.05** | 51.64 |
| 1 |  | -1.17 | 40.07 | -0.26 | 39.92 | -0.09 | 39.80 | -0.12 | 39.83 | -0.12 | 39.77 |  | -1.73 | 41.46 | -0.46 | 41.37 | -0.46 | 41.31 | -0.46 | 41.36 | -0.46 | 41.32 |
| 1.25 |  | **-2.21** | 31.03 | -0.35 | 30.79 | -0.02 | 30.56 | -0.11 | 30.71 | -0.11 | 30.65 |  | **-3.97** | 32.13 | -0.39 | 31.90 | 0.07 | 31.78 | -0.21 | 31.87 | -0.21 | 31.83 |
| 2 |  | **-8.26** | 18.18 | -1.16 | 17.76 | 0.15 | 17.45 | -0.32 | 17.62 | -0.32 | 17.54 |  | **-11.60** | 18.87 | -1.14 | 18.57 | 0.21 | 18.26 | -0.62 | 18.47 | -0.62 | 18.42 |
| 5 |  | **-29.44** | 6.40 | **-2.53** | 5.84 | -0.65 | 5.38 | -1.05 | 5.65 | -1.05 | 5.49 |  | **-34.38** | 6.64 | **-2.49** | 6.20 | 0.09 | 5.81 | -0.82 | 6.07 | -0.82 | 5.97 |
| 10 |  | **-48.51** | 3.00 | **-4.74** | 2.35 | 0.06 | 1.87 | -1.36 | 2.15 | -1.32 | 1.83 |  | **-53.07** | 3.06 | **-4.53** | 2.57 | -0.86 | 2.15 | -1.67 | 2.41 | -1.64 | 2.19 |
| 20 |  | **-64.97** | 1.60 | **-7.38** | 0.88 | 0.23 | 0.43 | **-4.04** | 0.69 | **-2.25** | 0.08 |  | **-68.40** | 1.56 | **-7.30** | 0.95 | -0.47 | 0.61 | **-3.33** | 0.83 | -1.63 | 0.40 |
| 0.05 | (80,100) | 2.18 | 93.09 | 1.72 | 93.50 | -1.31 | 94.00 | 1.11 | 93.66 | 1.11 | 93.66 | (120,80) | 3.00 | 92.28 | 1.49 | 92.85 | 0.24 | 93.41 | 0.34 | 93.04 | 0.34 | 93.03 |
| 0.1 |  | 1.93 | 89.76 | 1.01 | 90.22 | -0.75 | 90.61 | 0.75 | 90.36 | 0.75 | 90.36 |  | 2.16 | 88.96 | 0.88 | 89.48 | -0.38 | 90.01 | -0.38 | 89.67 | -0.38 | 89.67 |
| 0.2 |  | 1.28 | 83.69 | -0.58 | 84.06 | -0.59 | 84.39 | -0.58 | 84.16 | -0.58 | 84.16 |  | 1.12 | 82.87 | 0.52 | 83.31 | -1.60 | 83.80 | 0.20 | 83.47 | 0.20 | 83.47 |
| 0.5 |  | -0.09 | 66.74 | -1.66 | 66.97 | -1.66 | 67.14 | -1.66 | 67.01 | -1.66 | 66.98 |  | -0.46 | 66.17 | -0.64 | 66.47 | -0.82 | 66.64 | -0.64 | 66.52 | -0.64 | 66.51 |
| 0.8 |  | **-3.04** | 50.85 | **-3.04** | 50.87 | **-3.04** | 50.86 | **-3.04** | 50.89 | **-3.04** | 50.86 |  | **-2.07** | 50.66 | -1.58 | 50.68 | -1.57 | 50.73 | -1.58 | 50.72 | -1.58 | 50.70 |
| 1 |  | **-2.23** | 40.66 | -0.25 | 40.45 | -0.12 | 40.33 | -0.25 | 40.39 | -0.25 | 40.34 |  | **-3.94** | 40.88 | -0.44 | 40.77 | -0.04 | 40.67 | -0.22 | 40.72 | -0.22 | 40.67 |
| 1.25 |  | **-4.52** | 31.34 | -0.48 | 31.10 | 0.16 | 30.89 | -0.48 | 31.05 | -0.48 | 30.99 |  | -0.54 | 31.88 | -0.22 | 31.73 | -0.22 | 31.59 | -0.22 | 31.66 | -0.22 | 31.62 |
| 2 |  | **-12.44** | 18.31 | -0.87 | 17.93 | 0.29 | 17.57 | -0.59 | 17.82 | -0.59 | 17.74 |  | **-3.09** | 18.89 | -0.34 | 18.63 | 0.26 | 18.39 | -0.32 | 18.57 | -0.29 | 18.53 |
| 5 |  | **-35.54** | 6.44 | **-3.09** | 5.88 | -0.65 | 5.39 | -0.91 | 5.70 | -0.91 | 5.52 |  | **-18.94** | 6.71 | -1.94 | 6.36 | 0.31 | 6.04 | -0.49 | 6.22 | -0.49 | 6.15 |
| 10 |  | **-54.14** | 3.02 | **-5.41** | 2.37 | 0.00 | 1.88 | -1.79 | 2.16 | -1.40 | 1.85 |  | **-37.46** | 3.07 | **-3.01** | 2.68 | 0.16 | 2.34 | -0.86 | 2.53 | -0.68 | 2.38 |
| 20 |  | **-69.22** | 1.61 | **-7.42** | 0.88 | 0.07 | 0.43 | **-4.28** | 0.70 | -**2.43** | 0.09 |  | **-55.86** | 1.50 | **-5.32** | 1.05 | -0.86 | 0.72 | **-2.54** | 0.93 | **-2.28** | 0.62 |
| 0.05 | (80,120) | 2.56 | 93.61 | 1.16 | 93.99 | 0.15 | 94.37 | 1.16 | 94.09 | 1.16 | 94.09 | (120,100) | 2.18 | 93.07 | 1.65 | 93.50 | -1.31 | 94.00 | 1.02 | 93.66 | 1.02 | 93.66 |
| 0.1 |  | 1.83 | 90.36 | 0.89 | 90.72 | -0.31 | 91.04 | -0.31 | 90.83 | -0.31 | 90.83 |  | 1.73 | 89.81 | 1.01 | 90.22 | -0.56 | 90.64 | 0.58 | 90.39 | 0.58 | 90.39 |
| 0.2 |  | 0.30 | 84.35 | 0.17 | 84.62 | -0.65 | 84.91 | 0.02 | 84.70 | 0.02 | 84.69 |  | 1.04 | 83.76 | -0.58 | 84.12 | -0.58 | 84.48 | -0.58 | 84.27 | -0.58 | 84.27 |
| 0.5 |  | -1.02 | 67.38 | -1.18 | 67.51 | -1.18 | 67.65 | -1.18 | 67.57 | -1.18 | 67.56 |  | -0.37 | 67.08 | -1.66 | 67.25 | -1.66 | 67.48 | -1.66 | 67.32 | -1.66 | 67.31 |
| 0.8 |  | -1.70 | 51.29 | -1.80 | 51.24 | -1.92 | 51.23 | -1.80 | 51.23 | -1.80 | 51.20 |  | **-3.04** | 51.39 | **-3.04** | 51.44 | **-3.04** | 51.45 | **-3.04** | 51.43 | **-3.04** | 51.42 |
| 1 |  | **-3.94** | 40.88 | -0.44 | 40.77 | -0.04 | 40.67 | -0.22 | 40.72 | -0.22 | 40.67 |  | -1.73 | 41.46 | -0.46 | 41.37 | -0.46 | 41.31 | -0.46 | 41.36 | -0.46 | 41.32 |
| 1.25 |  | **-7.10** | 31.54 | -0.64 | 31.38 | -0.00 | 31.13 | -0.57 | 31.34 | -0.57 | 31.29 |  | -0.55 | 32.24 | -0.19 | 32.10 | -0.00 | 31.97 | -0.09 | 32.05 | -0.09 | 32.02 |
| 2 |  | **-16.36** | 18.43 | -1.15 | 18.03 | 0.20 | 17.67 | -0.46 | 17.94 | -0.46 | 17.87 |  | **-5.58** | 19.09 | -0.49 | 18.80 | -0.17 | 18.62 | -0.17 | 18.73 | -0.17 | 18.69 |
| 5 |  | **-40.55** | 6.46 | **-3.64** | 5.90 | -0.68 | 5.41 | -1.09 | 5.73 | -1.09 | 5.57 |  | **-24.53** | 6.78 | -1.56 | 6.42 | 0.32 | 6.08 | -1.47 | 6.30 | -0.61 | 6.21 |
| 10 |  | **-58.47** | 3.04 | **-5.93** | 2.37 | -0.26 | 1.89 | **-2.12** | 2.17 | -1.75 | 1.85 |  | **-43.53** | 3.11 | **-3.37** | 2.68 | 0.19 | 2.35 | -1.49 | 2.56 | -1.12 | 2.41 |
| 20 |  | **-72.35** | 1.62 | **-7.93** | 0.88 | -0.05 | 0.43 | **-4.30** | 0.69 | **-2.44** | 0.08 |  | **-60.96** | 1.51 | **-6.28** | 1.06 | -0.94 | 0.73 | **-2.74** | 0.94 | -**2.63** | 0.64 |
| 0.05 | (100,80) | 3.04 | 92.26 | 1.39 | 92.84 | 0.34 | 93.40 | 0.34 | 93.04 | 0.34 | 93.03 | (120,120) | 2.60 | 93.61 | 1.16 | 93.99 | 0.07 | 94.38 | 1.09 | 94.13 | 1.09 | 94.13 |
| 0.1 |  | 2.21 | 88.95 | 0.61 | 89.49 | -0.38 | 90.00 | -0.38 | 89.68 | -0.38 | 89.68 |  | 1.96 | 90.39 | 0.64 | 90.75 | -0.31 | 91.11 | -0.31 | 90.86 | -0.31 | 90.86 |
| 0.2 |  | 1.12 | 82.86 | 0.39 | 83.30 | -1.60 | 83.74 | -0.22 | 83.44 | -0.22 | 83.44 |  | 0.30 | 84.39 | 0.30 | 84.69 | -0.40 | 84.98 | 0.10 | 84.79 | 0.10 | 84.79 |
| 0.5 |  | -0.35 | 66.08 | -0.46 | 66.35 | **-2.28** | 66.54 | -0.87 | 66.40 | -0.87 | 66.39 |  | -1.02 | 67.70 | -1.02 | 67.85 | -1.02 | 68.05 | -1.02 | 67.92 | -1.02 | 67.91 |
| 0.8 |  | -1.59 | 50.43 | -1.59 | 50.43 | -1.59 | 50.46 | -1.59 | 50.47 | -1.59 | 50.45 |  | -1.80 | 51.92 | -1.79 | 51.92 | -1.79 | 51.95 | -1.79 | 51.94 | -1.79 | 51.92 |
| 1 |  | **-2.23** | 40.66 | -0.25 | 40.45 | -0.12 | 40.33 | -0.25 | 40.39 | -0.25 | 40.34 |  | -1.28 | 41.86 | -0.32 | 41.73 | -0.32 | 41.72 | -0.32 | 41.72 | -0.32 | 41.68 |
| 1.25 |  | -1.21 | 31.55 | -0.70 | 31.38 | -0.16 | 31.15 | -0.70 | 31.34 | -0.70 | 31.29 |  | **-2.29** | 32.55 | -0.21 | 32.37 | 0.09 | 32.25 | -0.21 | 32.32 | -0.21 | 32.29 |
| 2 |  | **-4.91** | 18.54 | -0.55 | 18.24 | 0.26 | 17.97 | -0.21 | 18.15 | -0.21 | 18.09 |  | **-8.29** | 19.18 | -0.86 | 18.99 | 0.18 | 18.69 | -0.23 | 18.85 | -0.23 | 18.81 |
| 5 |  | **-23.50** | 6.56 | -1.54 | 6.11 | 0.21 | 5.73 | -0.53 | 5.97 | -0.53 | 5.86 |  | **-29.37** | 6.80 | **-2.45** | 6.45 | 0.26 | 6.09 | -1.47 | 6.32 | -0.59 | 6.24 |
| 10 |  | **-42.50** | 3.03 | **-3.76** | 2.54 | -0.79 | 2.14 | -1.55 | 2.38 | -1.55 | 2.18 |  | **-48.37** | 3.12 | **-4.65** | 2.70 | -0.03 | 2.36 | -1.32 | 2.57 | -1.16 | 2.42 |
| 20 |  | **-60.14** | 1.54 | **-6.25** | 0.94 | -0.25 | 0.61 | **-2.62** | 0.82 | -1.52 | 0.40 |  | **-64.81** | 1.52 | **-6.40** | 1.06 | -1.01 | 0.74 | **-2.90** | 0.94 | **-2.66** | 0.64 |
| 0.05 | (100,100) | 2.18 | 93.07 | 1.79 | 93.50 | -1.31 | 93.99 | 1.06 | 93.67 | 1.06 | 93.67 |  |  |  |  |  |  |  |  |  |  |  |
| 0.1 |  | 1.81 | 89.79 | 1.01 | 90.22 | -0.35 | 90.63 | 0.54 | 90.35 | 0.54 | 90.35 |  |  |  |  |  |  |  |  |  |  |  |
| 0.2 |  | 1.20 | 83.74 | -0.58 | 84.09 | -0.58 | 84.46 | -0.58 | 84.23 | -0.58 | 84.23 |  |  |  |  |  |  |  |  |  |  |  |
| 0.5 |  | -0.23 | 66.99 | -1.66 | 67.13 | -1.66 | 67.31 | -1.66 | 67.19 | -1.66 | 67.18 |  |  |  |  |  |  |  |  |  |  |  |
| 0.8 |  | **-3.04** | 51.13 | **-3.04** | 51.14 | **-3.04** | 51.16 | **-3.04** | 51.15 | **-3.04** | 51.13 |  |  |  |  |  |  |  |  |  |  |  |
| 1 |  | -1.23 | 41.08 | -0.18 | 40.97 | -0.18 | 40.89 | -0.18 | 40.97 | -0.18 | 40.93 |  |  |  |  |  |  |  |  |  |  |  |
| 1.25 |  | **-2.26** | 31.84 | -0.19 | 31.67 | 0.10 | 31.52 | -0.18 | 31.61 | -0.18 | 31.58 |  |  |  |  |  |  |  |  |  |  |  |
| 2 |  | **-8.28** | 18.74 | -1.32 | 18.44 | 0.20 | 18.18 | -0.27 | 18.31 | -0.27 | 18.25 |  |  |  |  |  |  |  |  |  |  |  |
| 5 |  | **-29.40** | 6.63 | **-2.57** | 6.18 | 0.00 | 5.78 | -0.64 | 6.02 | -0.64 | 5.91 |  |  |  |  |  |  |  |  |  |  |  |
| 10 |  | **-48.42** | 3.04 | **-4.68** | 2.55 | -0.78 | 2.14 | -1.60 | 2.40 | -1.60 | 2.19 |  |  |  |  |  |  |  |  |  |  |  |
| 20 |  | **-64.88** | 1.56 | **-7.15** | 0.95 | -0.37 | 0.62 | **-3.02** | 0.82 | -1.59 | 0.40 |  |  |  |  |  |  |  |  |  |  |  |

| *ρ* | (*n*1,*n*2) | ZN0 | | ZN1 | | ZN2 | | ZN3 | | ZN4 | | (*n1* ,*n2*) | ZN0 | | ZN1 | | ZN2 | | ZN3 | | ZN4 | |
| --- | --- | --- | --- | --- | --- | --- | --- | --- | --- | --- | --- | --- | --- | --- | --- | --- | --- | --- | --- | --- | --- | --- |
| 0.05 | (80,80) | **-4.38** | 94.18 | **-15.38** | 94.76 | **-25.99** | 95.26 | **-18.09** | 94.92 | **-18.09** | 94.92 | (100,120) | **-6.18** | 94.90 | **-12.59** | 95.25 | **-25.05** | 95.63 | **-18.93** | 95.38 | **-18.93** | 95.38 |
| 0.1 |  | **-8.10** | 90.76 | **-31.60** | 91.37 | **-31.79** | 91.80 | **-31.60** | 91.50 | **-31.60** | 91.50 |  | **-6.70** | 91.55 | **-27.17** | 91.93 | **-27.38** | 92.26 | **-27.17** | 92.03 | **-27.17** | 92.03 |
| 0.2 |  | **-16.23** | 84.26 | **-18.81** | 84.65 | **-19.68** | 85.12 | **-19.67** | 84.82 | **-19.67** | 84.82 |  | **-13.36** | 85.26 | **-13.36** | 85.57 | **-14.38** | 85.86 | **-14.38** | 85.70 | **-14.38** | 85.70 |
| 0.5 |  | -1.80 | 66.51 | -1.80 | 66.83 | **-2.28** | 66.97 | -1.80 | 66.86 | -1.61 | 66.85 |  | -1.02 | 67.97 | -1.02 | 68.09 | -1.40 | 68.27 | -1.17 | 68.16 | -1.17 | 68.15 |
| 0.8 |  | -0.65 | 50.16 | -0.65 | 50.16 | -0.65 | 50.18 | -0.65 | 50.18 | -0.65 | 50.16 |  | -0.53 | 51.66 | -0.69 | 51.71 | -0.95 | 51.76 | -0.95 | 51.77 | -0.95 | 51.76 |
| 1 |  | -0.26 | 39.92 | -0.09 | 39.80 | 0.06 | 39.67 | 0.06 | 39.70 | 0.06 | 39.64 |  | -0.46 | 41.38 | -0.46 | 41.28 | -0.46 | 41.19 | -0.46 | 41.27 | -0.46 | 41.22 |
| 1.25 |  | -0.07 | 30.71 | 0.29 | 30.51 | 0.50 | 30.32 | 0.31 | 30.44 | 0.32 | 30.38 |  | -0.58 | 31.88 | 0.12 | 31.72 | 0.41 | 31.55 | 0.30 | 31.64 | 0.33 | 31.61 |
| 2 |  | 0.04 | 17.48 | 0.35 | 17.04 | 1.26 | 16.77 | 0.35 | 16.95 | 1.07 | 16.87 |  | 0.23 | 18.27 | 0.57 | 17.99 | 0.57 | 17.73 | 0.57 | 17.91 | 0.85 | 17.86 |
| 5 |  | -0.65 | 5.21 | 1.62 | 4.79 | 2.08 | 4.37 | 1.90 | 4.63 | 1.90 | 4.50 |  | 0.09 | 5.69 | 1.48 | 5.32 | 2.17 | 4.98 | 1.74 | 5.20 | 1.74 | 5.11 |
| 10 |  | 0.60 | 1.74 | 1.47 | 1.31 | 3.52 | 1.01 | 3.04 | 1.20 | 3.04 | 0.93 |  | -0.76 | 2.03 | 1.94 | 1.69 | 2.62 | 1.37 | 2.20 | 1.58 | 2.20 | 1.40 |
| 20 |  | 0.23 | 0.43 | 2.90 | 0.15 | 5.00 | 0.00 | 3.24 | 0.08 | 5.00 | 0.00 |  | -0.15 | 0.60 | 3.08 | 0.29 | 4.09 | 0.14 | 3.55 | 0.24 | 5.00 | 0.00 |
| 0.05 | (80,100) | **-3.36** | 94.57 | **-13.28** | 95.01 | **-23.04** | 95.45 | **-16.58** | 95.18 | **-16.58** | 95.18 | (120,80) | **-7.06** | 94.23 | **-16.74** | 94.76 | **-29.45** | 95.30 | **-20.50** | 94.95 | **-20.50** | 94.95 |
| 0.1 |  | **-13.22** | 91.24 | **-27.93** | 91.65 | **-28.53** | 92.07 | **-28.31** | 91.80 | **-28.31** | 91.80 |  | **-9.67** | 90.80 | **-36.72** | 91.42 | **-36.87** | 91.86 | **-36.72** | 91.56 | **-36.72** | 91.56 |
| 0.2 |  | **-14.04** | 84.81 | **-14.04** | 85.16 | **-15.15** | 85.52 | **-14.04** | 85.27 | **-14.04** | 85.27 |  | **-11.68** | 84.32 | **-24.01** | 84.77 | **-24.61** | 85.24 | **-24.40** | 84.94 | **-24.40** | 84.94 |
| 0.5 |  | -0.58 | 67.23 | -1.66 | 67.44 | -1.67 | 67.58 | -1.66 | 67.49 | -1.66 | 67.47 |  | **-7.29** | 66.87 | **-7.29** | 67.08 | **-7.36** | 67.33 | **-7.29** | 67.23 | **-2.75** | 67.22 |
| 0.8 |  | -0.80 | 50.85 | -0.80 | 50.86 | -0.80 | 50.86 | -0.80 | 50.85 | -0.80 | 50.83 |  | -1.69 | 50.79 | -1.01 | 50.80 | -1.64 | 50.80 | -1.01 | 50.79 | -0.99 | 50.77 |
| 1 |  | -0.80 | 40.48 | -0.80 | 40.37 | -0.80 | 40.29 | -0.80 | 40.33 | -0.80 | 40.28 |  | -0.35 | 40.79 | -0.35 | 40.71 | -0.35 | 40.58 | -0.35 | 40.64 | -0.35 | 40.59 |
| 1.25 |  | -0.02 | 31.00 | 0.16 | 30.82 | 0.49 | 30.62 | 0.16 | 30.78 | 0.16 | 30.73 |  | -0.22 | 31.71 | -0.22 | 31.57 | -0.22 | 31.42 | -0.22 | 31.51 | -0.22 | 31.47 |
| 2 |  | -0.00 | 17.57 | 0.35 | 17.21 | 0.35 | 16.88 | 0.35 | 17.13 | 0.91 | 17.06 |  | 0.25 | 18.44 | 0.73 | 18.21 | 1.12 | 17.94 | 0.88 | 18.12 | 0.95 | 18.08 |
| 5 |  | -0.65 | 5.27 | 1.55 | 4.79 | 2.10 | 4.40 | 1.78 | 4.64 | 1.78 | 4.51 |  | 0.54 | 5.95 | 1.12 | 5.66 | 2.39 | 5.33 | 1.12 | 5.53 | 1.94 | 5.45 |
| 10 |  | 0.45 | 1.75 | 1.46 | 1.33 | 3.48 | 1.00 | 2.98 | 1.20 | 2.98 | 0.93 |  | 0.49 | 2.23 | 1.18 | 1.93 | 3.06 | 1.64 | 2.51 | 1.83 | 2.51 | 1.70 |
| 20 |  | 0.07 | 0.43 | 2.82 | 0.16 | 5.00 | 0.00 | 3.23 | 0.07 | 5.00 | 0.00 |  | -0.76 | 0.70 | 2.57 | 0.46 | 3.44 | 0.24 | 3.04 | 0.38 | -3.27 | 0.11 |
| 0.05 | (80,120) | **-4.98** | 94.89 | **-12.71** | 95.26 | **-24.08** | 95.62 | **-16.57** | 95.37 | **-16.57** | 95.37 | (120,100) | **-5.17** | 94.60 | **-16.88** | 95.04 | **-27.96** | 95.49 | **-19.17** | 95.22 | **-19.17** | 95.00 |
| 0.1 |  | **-13.37** | 91.52 | **-21.02** | 91.90 | **-27.49** | 92.24 | **-21.02** | 92.00 | **-21.02** | 92.00 |  | **-8.83** | 91.24 | **-33.88** | 91.72 | **-34.17** | 92.10 | **-34.07** | 91.84 | **-34.07** | 91.84 |
| 0.2 |  | **-6.07** | 85.23 | **-6.07** | 85.51 | **-9.10** | 85.81 | **-6.07** | 85.58 | **-3.88** | 85.57 |  | **-17.15** | 84.91 | **-23.08** | 85.30 | **-23.08** | 85.62 | **-23.08** | 85.38 | **-23.08** | 85.38 |
| 0.5 |  | -1.02 | 67.73 | -1.50 | 67.91 | -1.71 | 68.05 | -1.50 | 67.99 | -1.50 | 67.97 |  | -1.47 | 67.58 | -1.90 | 67.78 | **-3.35** | 67.95 | -1.90 | 67.84 | -1.88 | 67.83 |
| 0.8 |  | -0.46 | 51.23 | -1.49 | 51.26 | -1.80 | 51.24 | -1.57 | 51.25 | -1.57 | 51.22 |  | -0.42 | 51.45 | -0.54 | 51.50 | -0.73 | 51.53 | -0.54 | 51.51 | -0.54 | 51.49 |
| 1 |  | -0.35 | 40.79 | -0.35 | 40.71 | -0.35 | 40.58 | -0.35 | 40.64 | -0.35 | 40.59 |  | -0.46 | 41.38 | -0.46 | 41.28 | -0.46 | 41.19 | -0.46 | 41.27 | -0.46 | 41.22 |
| 1.25 |  | -0.06 | 31.22 | 0.13 | 31.03 | 0.13 | 30.89 | 0.13 | 30.97 | 0.16 | 30.92 |  | -0.06 | 32.08 | -0.00 | 31.95 | -0.00 | 31.87 | -0.00 | 31.91 | -0.00 | 31.89 |
| 2 |  | -0.01 | 17.65 | 0.35 | 17.32 | 0.35 | 16.97 | 0.35 | 17.20 | 0.69 | 17.14 |  | 0.18 | 18.60 | 0.74 | 18.38 | 0.88 | 18.12 | 0.88 | 18.30 | 0.96 | 18.26 |
| 5 |  | -0.65 | 5.26 | 1.49 | 4.81 | 2.02 | 4.42 | 1.70 | 4.68 | 1.70 | 4.54 |  | 0.40 | 6.00 | 1.05 | 5.69 | 2.29 | 5.39 | 1.12 | 5.57 | 1.73 | 5.50 |
| 10 |  | 0.34 | 1.75 | 1.46 | 1.35 | 3.38 | 1.02 | 2.83 | 1.21 | 2.83 | 0.94 |  | 0.46 | 2.25 | 1.18 | 1.93 | 2.92 | 1.67 | 2.45 | 1.83 | 2.45 | 1.70 |
| 20 |  | 0.11 | 0.42 | 2.75 | 0.16 | 5.00 | 0.00 | 3.22 | 0.07 | 5.00 | 0.00 |  | -0.76 | 0.70 | 2.51 | 0.46 | 3.42 | 0.25 | 3.00 | 0.38 | 3.23 | 0.11 |
| 0.05 | (100,80) | **-4.78** | 94.21 | **-16.13** | 94.76 | **-26.95** | 95.27 | **-20.56** | 94.94 | **-20.56** | 94.94 | (120,120) | **-4.38** | 94.89 | **-15.33** | 95.25 | **-25.84** | 95.64 | **-18.02** | 95.38 | **-18.02** | 95.38 |
| 0.1 |  | **-10.00** | 90.80 | **-32.90** | 91.39 | **-36.46** | 91.83 | **-32.90** | 91.54 | **-32.90** | 91.54 |  | **-8.13** | 91.56 | **-31.48** | 91.96 | **-31.69** | 92.28 | **-31.48** | 92.07 | **-31.48** | 92.07 |
| 0.2 |  | **-11.11** | 84.29 | **-22.12** | 84.76 | **-22.57** | 85.17 | **-22.12** | 84.87 | **-22.12** | 84.87 |  | **-16.21** | 85.32 | **-18.81** | 85.66 | **-19.68** | 85.92 | **-19.67** | 85.73 | **-19.67** | 85.73 |
| 0.5 |  | **-7.49** | 66.75 | **-2.58** | 66.94 | **-3.06** | 67.19 | **-3.06** | 67.02 | **-2.95** | 67.01 |  | -1.88 | 68.14 | -1.89 | 68.26 | **-2.02** | 68.45 | -1.89 | 68.30 | -1.26 | 68.29 |
| 0.8 |  | -1.04 | 50.53 | -1.04 | 50.58 | -1.04 | 50.59 | -1.04 | 50.59 | -1.02 | 50.58 |  | -0.55 | 51.97 | -0.42 | 51.96 | -0.54 | 52.00 | -0.54 | 51.98 | -0.54 | 51.97 |
| 1 |  | -0.80 | 40.48 | -0.80 | 40.37 | -0.80 | 40.29 | -0.80 | 40.33 | -0.80 | 40.28 |  | -0.32 | 41.76 | -0.32 | 41.72 | -0.32 | 41.61 | -0.32 | 41.68 | -0.32 | 41.65 |
| 1.25 |  | -0.38 | 31.33 | 0.12 | 31.06 | 0.34 | 30.88 | 0.22 | 31.01 | 0.22 | 30.96 |  | -0.10 | 32.35 | 0.01 | 32.22 | 0.45 | 32.05 | 0.29 | 32.15 | 0.29 | 32.12 |
| 2 |  | 0.20 | 18.02 | 0.57 | 17.72 | 1.44 | 17.46 | 0.57 | 17.60 | 1.04 | 17.55 |  | 0.11 | 18.70 | 0.47 | 18.52 | 0.88 | 18.24 | 0.72 | 18.40 | 0.72 | 18.37 |
| 5 |  | 0.21 | 5.62 | 1.78 | 5.26 | 2.18 | 4.91 | 1.86 | 5.15 | 1.86 | 5.05 |  | 0.26 | 6.01 | 1.08 | 5.70 | 2.28 | 5.38 | 1.12 | 5.59 | 1.74 | 5.51 |
| 10 |  | -0.76 | 2.03 | 2.06 | 1.67 | 2.63 | 1.36 | 2.41 | 1.55 | 2.41 | 1.37 |  | 0.43 | 2.25 | 1.16 | 1.95 | 2.93 | 1.67 | 2.40 | 1.84 | 2.40 | 1.71 |
| 20 |  | 0.19 | 0.59 | 3.20 | 0.29 | 4.14 | 0.13 | 3.66 | 0.23 | 5.00 | 0.00 |  | -0.80 | 0.70 | 2.46 | 0.46 | 3.43 | 0.25 | 2.96 | 0.38 | 3.21 | 0.12 |
| 0.05 | (100,100) | **-4.38** | 94.60 | **-15.35** | 95.05 | **-25.90** | 95.48 | **-18.05** | 95.20 | **-18.05** | 95.20 |  |  |  |  |  |  |  |  |  |  |  |
| 0.1 |  | **-8.12** | 91.24 | **-31.53** | 91.70 | **-31.73** | 92.09 | **-31.53** | 91.83 | **-31.53** | 91.83 |  |  |  |  |  |  |  |  |  |  |  |
| 0.2 |  | **-16.22** | 84.85 | **-18.81** | 85.23 | **-19.68** | 85.57 | **-19.67** | 85.34 | **-19.67** | 85.34 |  |  |  |  |  |  |  |  |  |  |  |
| 0.5 |  | -1.85 | 67.42 | -1.85 | 67.64 | -1.86 | 67.81 | -1.85 | 67.69 | -1.66 | 67.67 |  |  |  |  |  |  |  |  |  |  |  |
| 0.8 |  | -0.97 | 51.25 | -0.97 | 51.27 | -0.97 | 51.27 | -0.97 | 51.28 | -0.97 | 51.27 |  |  |  |  |  |  |  |  |  |  |  |
| 1 |  | -0.18 | 40.97 | -0.18 | 40.89 | -0.18 | 40.79 | -0.18 | 40.85 | -0.18 | 40.81 |  |  |  |  |  |  |  |  |  |  |  |
| 1.25 |  | -0.06 | 31.59 | 0.25 | 31.45 | 0.52 | 31.28 | 0.38 | 31.37 | 0.38 | 31.34 |  |  |  |  |  |  |  |  |  |  |  |
| 2 |  | 0.15 | 18.16 | 0.57 | 17.87 | 0.57 | 17.63 | 0.57 | 17.76 | 0.94 | 17.71 |  |  |  |  |  |  |  |  |  |  |  |
| 5 |  | 0.00 | 5.67 | 1.48 | 5.29 | 2.28 | 4.95 | 1.79 | 5.20 | 1.79 | 5.11 |  |  |  |  |  |  |  |  |  |  |  |
| 10 |  | -0.76 | 2.02 | 2.07 | 1.69 | 2.62 | 1.37 | 2.36 | 1.56 | 2.36 | 1.38 |  |  |  |  |  |  |  |  |  |  |  |
| 20 |  | -0.01 | 0.59 | 3.13 | 0.29 | 4.11 | 0.14 | 3.60 | 0.24 | 5.00 | 0.00 |  |  |  |  |  |  |  |  |  |  |  |

| *ρ* | (*n*1,*n*2) | ZC0 | | ZC1 | | ZC2 | | ZC3 | | ZC4 | | (*n1* ,*n2*) | ZC0 | | ZC1 | | ZC2 | | ZC3 | | ZC4 | |
| --- | --- | --- | --- | --- | --- | --- | --- | --- | --- | --- | --- | --- | --- | --- | --- | --- | --- | --- | --- | --- | --- | --- |
| 0.05 | (80,80) | **-4.38** | 94.16 | **-15.38** | 94.70 | **-25.99** | 95.24 | **-18.09** | 94.88 | **-18.09** | 94.88 | (100,120) | **-6.18** | 94.84 | **-12.59** | 95.20 | **-25.05** | 95.57 | **-15.78** | 95.34 | **-15.78** | 95.34 |
| 0.1 |  | **-3.34** | 90.50 | **-8.20** | 91.05 | **-18.02** | 91.53 | **-13.13** | 91.25 | **-13.13** | 91.25 |  | **-4.98** | 91.40 | **-10.71** | 91.75 | **-16.41** | 92.09 | **-10.71** | 91.87 | **-10.71** | 91.87 |
| 0.2 |  | **-2.94** | 83.98 | **-5.64** | 84.45 | **-11.22** | 84.85 | **-11.22** | 84.59 | **-8.45** | 84.58 |  | **-3.83** | 85.13 | **-5.05** | 85.43 | **-6.31** | 85.74 | **-5.06** | 85.52 | **-4.31** | 85.51 |
| 0.5 |  | -1.79 | 66.41 | -1.80 | 66.62 | **-2.28** | 66.91 | -1.80 | 66.70 | -1.27 | 66.68 |  | -1.02 | 67.87 | -1.02 | 68.04 | -1.57 | 68.20 | -1.02 | 68.07 | -1.02 | 68.06 |
| 0.8 |  | -1.20 | 50.22 | -1.20 | 50.22 | -1.20 | 50.24 | -1.20 | 50.22 | -1.20 | 50.19 |  | -1.61 | 51.71 | -1.61 | 51.72 | **-2.06** | 51.76 | **-2.06** | 51.74 | **-2.06** | 51.72 |
| 1 |  | -1.17 | 39.98 | -0.09 | 39.80 | 0.06 | 39.73 | 0.06 | 39.77 | 0.06 | 39.70 |  | -0.79 | 41.43 | -0.46 | 41.31 | -0.46 | 41.23 | -0.46 | 41.28 | -0.46 | 41.23 |
| 1.25 |  | -0.10 | 30.76 | 0.20 | 30.59 | 0.50 | 30.29 | 0.29 | 30.44 | 0.29 | 30.38 |  | -0.09 | 31.90 | 0.11 | 31.76 | 0.41 | 31.57 | 0.12 | 31.70 | 0.12 | 31.67 |
| 2 |  | -0.05 | 17.57 | 0.35 | 17.19 | 1.07 | 16.89 | 0.35 | 17.07 | 0.92 | 16.99 |  | 0.05 | 18.38 | 0.50 | 18.11 | 0.57 | 17.81 | 0.57 | 17.99 | 0.77 | 17.94 |
| 5 |  | -0.73 | 5.43 | 1.28 | 4.94 | 2.08 | 4.54 | 1.62 | 4.80 | 1.62 | 4.65 |  | -0.18 | 5.83 | 0.31 | 5.46 | 1.97 | 5.10 | 1.48 | 5.32 | 1.48 | 5.22 |
| 10 |  | 0.06 | 1.91 | 1.37 | 1.46 | 3.30 | 1.11 | 1.47 | 1.31 | 2.72 | 1.02 |  | -0.86 | 2.14 | 1.64 | 1.79 | 2.51 | 1.47 | 2.08 | 1.68 | 2.08 | 1.49 |
| 20 |  | -0.26 | 0.46 | 2.72 | 0.18 | 5.00 | 0.00 | 3.13 | 0.11 | 5.00 | 0.00 |  | -0.31 | 0.61 | 3.00 | 0.30 | 4.02 | 0.16 | 3.43 | 0.25 | 5.00 | 0.00 |
| 0.05 | (80,100) | **-3.36** | 95.54 | **-13.28** | 94.99 | **-23.04** | 95.42 | **-16.58** | 95.14 | **-16.58** | 95.14 | (120,80) | **-7.06** | 94.18 | **-16.74** | 94.73 | **-27.72** | 95.25 | **-20.50** | 94.92 | **-20.50** | 94.92 |
| 0.1 |  | **-5.39** | 91.03 | **-11.23** | 91.43 | **-17.23** | 91.86 | **-11.33** | 91.57 | **-11.33** | 91.57 |  | **-3.91** | 90.59 | **-14.37** | 91.12 | **-21.24** | 91.61 | **-17.83** | 91.30 | **-17.83** | 91.30 |
| 0.2 |  | **-4.19** | 84.61 | **-5.63** | 84.97 | **-5.64** | 85.28 | **-5.63** | 85.09 | **-4.82** | 85.08 |  | **-6.10** | 84.14 | **-6.29** | 84.56 | **-12.40** | 85.02 | **-12.27** | 84.72 | **-12.27** | 84.72 |
| 0.5 |  | -1.00 | 67.14 | -1.66 | 67.29 | -1.66 | 67.51 | -1.66 | 67.35 | -1.66 | 67.34 |  | **-7.29** | 66.76 | **-2.75** | 67.00 | **-7.36** | 67.26 | **-2.75** | 67.05 | **-2.57** | 67.04 |
| 0.8 |  | -1.31 | 50.96 | -1.31 | 50.92 | **-3.04** | 50.91 | -1.84 | 50.94 | -1.84 | 50.91 |  | **-2.86** | 50.81 | **-2.86** | 50.83 | **-2.86** | 50.84 | **-2.86** | 50.82 | **-2.16** | 50.80 |
| 1 |  | -0.80 | 40.52 | -0.80 | 40.41 | -0.80 | 40.30 | -0.80 | 40.39 | -0.80 | 40.33 |  | -1.71 | 40.85 | -0.90 | 40.74 | -0.62 | 40.63 | -0.62 | 40.72 | -0.62 | 40.67 |
| 1.25 |  | -0.48 | 31.10 | 0.16 | 30.84 | 0.49 | 30.67 | 0.16 | 30.80 | 0.16 | 30.74 |  | -0.25 | 31.71 | -0.22 | 31.58 | -0.22 | 31.46 | -0.22 | 31.54 | -0.22 | 31.49 |
| 2 |  | -0.00 | 17.68 | 0.35 | 17.36 | 1.11 | 16.98 | 0.35 | 17.20 | 0.88 | 17.13 |  | -0.33 | 18.58 | 0.49 | 18.30 | 1.01 | 18.07 | 0.54 | 18.25 | 0.54 | 18.20 |
| 5 |  | -0.70 | 5.43 | 1.28 | 4.96 | 1.97 | 4.52 | 1.55 | 4.79 | 1.55 | 4.64 |  | 0.03 | 6.09 | 1.00 | 5.77 | 2.05 | 5.48 | 1.12 | 5.67 | 1.56 | 5.59 |
| 10 |  | 0.00 | 1.88 | 1.29 | 1.47 | 3.20 | 1.11 | 1.47 | 1.32 | 2.59 | 1.03 |  | 0.16 | 2.36 | 1.14 | 2.05 | 2.72 | 1.75 | 1.18 | 1.93 | 2.28 | 1.79 |
| 20 |  | -0.12 | 0.44 | 2.66 | 0.18 | 5.00 | 0.00 | 3.13 | 0.10 | 5.00 | 0.00 |  | -0.86 | 0.73 | 2.43 | 0.48 | 3.36 | 0.29 | 2.83 | 0.41 | 3.06 | 0.15 |
| 0.05 | (80,120) | **-4.98** | 94.81 | **-12.71** | 95.18 | **-20.37** | 95.56 | **-16.56** | 95.33 | **-16.56** | 95.33 | (120,100) | **-5.17** | 94.56 | **-14.56** | 95.02 | **-25.82** | 95.44 | **-19.17** | 95.16 | **-19.17** | 95.16 |
| 0.1 |  | -1.88 | 91.34 | **-7.47** | 91.72 | **-14.29** | 92.05 | **-8.35** | 91.83 | **-8.35** | 91.83 |  | **-6.07** | 91.10 | **-10.28** | 91.51 | **-18.69** | 91.91 | **-14.51** | 91.63 | **-14.51** | 91.63 |
| 0.2 |  | **-6.02** | 85.03 | **-6.07** | 85.35 | **-6.07** | 85.61 | **-6.07** | 85.45 | **-3.67** | 85.44 |  | **-3.31** | 84.75 | **-8.59** | 85.09 | **-15.92** | 85.48 | **-8.91** | 85.23 | **-8.91** | 85.23 |
| 0.5 |  | -1.02 | 67.67 | -1.41 | 67.85 | -1.80 | 68.00 | -1.50 | 67.90 | -1.50 | 67.88 |  | -0.76 | 67.49 | -1.90 | 67.71 | -1.90 | 67.85 | -1.90 | 67.78 | -1.88 | 67.77 |
| 0.8 |  | **-2.11** | 51.32 | **-2.24** | 51.31 | -2.37 | 51.36 | **-2.32** | 51.34 | **-2.32** | 51.31 |  | -1.71 | 51.49 | -1.19 | 51.53 | -0.73 | 51.53 | -0.85 | 51.51 | -0.85 | 51.49 |
| 1 |  | -1.71 | 40.85 | -0.90 | 40.74 | -0.62 | 40.63 | -0.62 | 40.72 | -0.62 | 40.67 |  | -0.79 | 41.43 | -0.46 | 41.31 | -0.46 | 41.23 | -0.46 | 41.28 | -0.46 | 41.23 |
| 1.25 |  | -0.14 | 31.29 | 0.16 | 31.06 | 0.34 | 30.91 | 0.28 | 31.00 | 0.28 | 30.95 |  | -0.17 | 32.09 | -0.00 | 31.98 | -0.00 | 31.86 | -0.00 | 31.94 | -0.00 | 31.90 |
| 2 |  | -0.10 | 17.81 | 0.35 | 17.42 | 0.35 | 17.09 | 0.35 | 17.32 | 0.63 | 17.25 |  | -0.17 | 18.73 | 0.50 | 18.46 | 0.88 | 18.27 | 0.74 | 18.38 | 0.74 | 18.35 |
| 5 |  | -0.68 | 5.43 | 1.26 | 4.99 | 1.87 | 4.55 | 1.49 | 4.82 | 1.49 | 4.66 |  | -0.07 | 6.14 | 0.79 | 5.82 | 1.12 | 5.49 | 1.05 | 5.70 | 1.05 | 5.63 |
| 10 |  | -0.05 | 1.89 | 1.34 | 1.45 | 3.22 | 1.10 | 1.47 | 1.32 | 2.60 | 1.02 |  | -0.09 | 2.36 | 1.05 | 2.05 | 2.78 | 1.75 | 1.18 | 1.93 | 2.27 | 1.79 |
| 20 |  | -0.22 | 0.44 | 2.69 | 0.17 | 5.00 | 0.00 | 3.14 | 0.09 | 5.00 | 0.00 |  | -0.94 | 0.74 | 2.39 | 0.48 | 3.36 | 0.27 | 2.82 | 0.41 | 3.06 | 0.15 |
| 0.05 | (100,80) | **-4.78** | 94.17 | **-16.13** | 94.72 | **-26.95** | 95.23 | **20.56** | 94.90 | **-20.56** | 94.90 | (120,120) | **-4.38** | 94.85 | **-15.33** | 95.22 | **-25.84** | 95.59 | **-18.02** | 95.36 | **-18.02** | 95.36 |
| 0.1 |  | **-5.63** | 90.56 | **-13.78** | 91.08 | **-21.82** | 91.59 | **-13.80** | 91.25 | **-13.80** | 91.25 |  | **-3.36** | 91.42 | **-8.21** | 91.80 | **-18.01** | 92.12 | **-13.13** | 91.91 | **-13.13** | 91.91 |
| 0.2 |  | **-2.70** | 84.09 | **-8.33** | 84.55 | **-15.51** | 84.95 | **-8.33** | 84.67 | **-8.33** | 84.67 |  | **-2.97** | 85.18 | **-5.70** | 85.49 | **-11.24** | 85.79 | **-6.57** | 85.60 | **-6.51** | 85.60 |
| 0.5 |  | -1.06 | 66.61 | -1.37 | 66.83 | **-3.06** | 67.05 | **-2.58** | 66.90 | **-2.29** | 66.89 |  | -1.88 | 68.02 | -1.89 | 68.21 | -1.89 | 68.33 | -1.89 | 68.25 | -1.26 | 68.23 |
| 0.8 |  | -1.38 | 50.59 | -1.38 | 50.61 | -1.04 | 50.63 | -1.04 | 50.59 | -1.02 | 50.58 |  | -1.47 | 51.99 | -1.47 | 52.03 | -1.47 | 52.02 | -1.47 | 52.03 | -1.47 | 52.01 |
| 1 |  | -0.80 | 40.52 | -0.80 | 40.41 | -0.80 | 40.30 | -0.80 | 40.39 | -0.80 | 40.33 |  | -1.28 | 41.83 | -0.32 | 41.72 | -0.32 | 41.66 | -0.32 | 41.70 | -0.32 | 41.66 |
| 1.25 |  | -1.21 | 31.44 | -0.07 | 31.11 | 0.23 | 30.93 | 0.12 | 31.02 | 0.12 | 30.99 |  | -0.10 | 32.35 | 0.19 | 32.20 | 0.37 | 32.07 | 0.19 | 32.16 | 0.19 | 32.14 |
| 2 |  | -0.00 | 18.12 | 0.49 | 17.87 | 1.16 | 17.55 | 0.86 | 17.72 | 0.86 | 17.68 |  | -0.10 | 18.81 | 0.47 | 18.59 | 0.88 | 18.33 | 0.47 | 18.53 | 0.47 | 18.50 |
| 5 |  | -0.16 | 5.82 | 0.31 | 5.44 | 2.18 | 5.06 | 1.46 | 5.30 | 1.46 | 5.21 |  | 0.22 | 6.11 | 0.88 | 5.83 | 1.12 | 5.49 | 1.08 | 5.71 | 1.08 | 5.64 |
| 10 |  | -0.79 | 2.16 | 1.85 | 1.80 | 2.53 | 1.48 | 2.06 | 1.69 | 2.06 | 1.49 |  | -0.03 | 2.36 | 1.09 | 2.04 | 2.68 | 1.76 | 1.18 | 1.93 | 2.25 | 1.78 |
| 20 |  | -0.25 | 0.62 | 3.08 | 0.31 | 4.05 | 0.16 | 3.49 | 0.26 | 5.00 | 0.00 |  | -0.89 | 0.73 | 2.36 | 0.48 | 3.36 | 0.27 | 2.81 | 0.40 | 3.10 | 0.14 |
| 0.05 | (100,100) | **-4.38** | 94.54 | **-15.35** | 95.00 | **-25.90** | 95.42 | **-18.05** | 95.16 | **-18.05** | 95.16 |  |  |  |  |  |  |  |  |  |  |  |
| 0.1 |  | **-3.35** | 91.06 | **-8.20** | 91.45 | **-18.01** | 91.89 | **-13.13** | 91.62 | **-13.13** | 91.62 |  |  |  |  |  |  |  |  |  |  |  |
| 0.2 |  | **-2.96** | 84.70 | **-5.67** | 85.03 | **-11.23** | 85.42 | **-11.23** | 85.20 | **-8.47** | 85.19 |  |  |  |  |  |  |  |  |  |  |  |
| 0.5 |  | -1.85 | 67.34 | -1.85 | 67.52 | -1.85 | 67.74 | -1.85 | 67.65 | -1.66 | 67.63 |  |  |  |  |  |  |  |  |  |  |  |
| 0.8 |  | -1.18 | 51.27 | -1.18 | 51.27 | -1.06 | 51.30 | -1.06 | 51.29 | -1.06 | 51.27 |  |  |  |  |  |  |  |  |  |  |  |
| 1 |  | -1.23 | 41.04 | -0.18 | 40.93 | -0.18 | 40.85 | -0.18 | 40.89 | -0.18 | 40.85 |  |  |  |  |  |  |  |  |  |  |  |
| 1.25 |  | -0.18 | 31.64 | 0.21 | 31.51 | 0.41 | 31.33 | 0.25 | 31.47 | 0.25 | 31.42 |  |  |  |  |  |  |  |  |  |  |  |
| 2 |  | -0.03 | 18.27 | 0.37 | 18.03 | 1.09 | 17.71 | 0.57 | 17.90 | 0.69 | 17.85 |  |  |  |  |  |  |  |  |  |  |  |
| 5 |  | 0.00 | 5.82 | 0.31 | 5.45 | 2.06 | 5.09 | 1.48 | 5.32 | 1.48 | 5.22 |  |  |  |  |  |  |  |  |  |  |  |
| 10 |  | -0.78 | 2.15 | 1.73 | 1.79 | 2.56 | 1.46 | 2.07 | 1.68 | 2.07 | 1.49 |  |  |  |  |  |  |  |  |  |  |  |
| 20 |  | -0.37 | 0.63 | 3.04 | 0.30 | 4.03 | 0.16 | 3.46 | 0.25 | 5.00 | 0.00 |  |  |  |  |  |  |  |  |  |  |  |

| *ρ* | (*n*1,*n*2) | ZA0 | | ZA 1 | | ZA 2 | | ZA 3 | | ZA 4 | | (*n1* ,*n2*) | ZA0 | | ZA 1 | | ZA 2 | | ZA 3 | | ZA 4 | |
| --- | --- | --- | --- | --- | --- | --- | --- | --- | --- | --- | --- | --- | --- | --- | --- | --- | --- | --- | --- | --- | --- | --- |
| 0.05 | (80,80) | 0.34 | 93.31 | -1.14 | 93.87 | **-5.53** | 94.45 | **-2.06** | 94.09 | **-2.06** | 94.09 | (100,120) | 1.16 | 94.23 | -0.64 | 94.62 | **-3.26** | 95.01 | **-2.86** | 94.77 | **-2.86** | 94.76 |
| 0.1 |  | -0.38 | 89.89 | -0.59 | 90.35 | **-3.82** | 90.93 | -1.36 | 90.55 | -1.36 | 90.53 |  | 0.74 | 90.93 | -0.56 | 91.30 | **-2.37** | 91.63 | -1.07 | 91.40 | -1.07 | 91.40 |
| 0.2 |  | 0.24 | 83.54 | -1.60 | 83.97 | **-2.17** | 84.42 | -1.60 | 84.15 | -1.60 | 84.15 |  | 0.22 | 84.80 | -0.79 | 85.10 | **-2.21** | 85.39 | -1.03 | 85.20 | -1.03 | 85.19 |
| 0.5 |  | -0.74 | 66.27 | -1.15 | 66.45 | **-2.28** | 66.76 | -1.30 | 66.58 | -1.30 | 66.56 |  | -1.02 | 67.80 | -1.25 | 67.97 | -1.59 | 68.11 | -1.25 | 68.01 | -1.25 | 68.00 |
| 0.8 |  | -1.42 | 50.22 | -1.42 | 50.24 | -1.20 | 50.22 | -1.42 | 50.22 | -1.42 | 50.21 |  | -1.61 | 51.69 | **-2.06** | 51.70 | **-2.06** | 51.72 | **-2.06** | 51.69 | **-2.06** | 51.67 |
| 1 |  | -1.17 | 39.98 | -0.09 | 39.80 | 0.06 | 39.73 | 0.06 | 39.77 | 0.06 | 39.70 |  | -0.79 | 41.43 | -0.46 | 41.31 | -0.46 | 41.23 | -0.46 | 41.28 | -0.46 | 41.23 |
| 1.25 |  | **-2.21** | 30.83 | -0.02 | 30.54 | 0.47 | 30.35 | 0.29 | 30.45 | 0.29 | 30.39 |  | -0.98 | 31.92 | 0.11 | 31.76 | 0.44 | 31.58 | 0.12 | 31.75 | 0.12 | 31.72 |
| 2 |  | **-3.20** | 17.73 | 0.35 | 17.34 | 1.07 | 17.04 | 0.63 | 17.18 | 0.63 | 17.12 |  | **-2.25** | 18.49 | 0.42 | 18.20 | 0.57 | 17.94 | 0.57 | 18.11 | 0.63 | 18.05 |
| 5 |  | **-6.25** | 5.85 | 0.72 | 5.29 | 1.62 | 4.89 | 1.28 | 5.14 | 1.28 | 4.97 |  | **-3.85** | 6.11 | 0.09 | 5.73 | 1.48 | 5.35 | 0.27 | 5.59 | 1.15 | 5.48 |
| 10 |  | **-8.45** | 2.38 | 0.34 | 1.86 | 1.45 | 1.43 | 0.84 | 1.72 | 0.84 | 1.40 |  | **-7.47** | 2.54 | -0.76 | 2.11 | 1.79 | 1.75 | 1.10 | 1.97 | 1.10 | 1.77 |
| 20 |  | **-11.91** | 0.99 | -0.26 | 0.46 | 2.62 | 0.20 | 1.07 | 0.37 | 5.00 | 0.00 |  | -**9.65** | 0.98 | -0.31 | 0.61 | 3.00 | 0.30 | 0.66 | 0.49 | 1.40 | 0.08 |
| 0.05 | (80,100) | 1.10 | 93.80 | -1.31 | 94.25 | **-3.02** | 94.71 | -1.31 | 94.41 | -1.31 | 94.41 | (120,80) | 0.34 | 93.52 | **-2.22** | 94.07 | **-12.90** | 94.65 | **-5.12** | 94.31 | **-5.12** | 94.31 |
| 0.1 |  | 0.91 | 90.40 | -0.75 | 90.86 | **-2.29** | 91.26 | **-2.26** | 91.00 | **-2.26** | 91.00 |  | -0.38 | 90.03 | -1.34 | 90.56 | **-7.37** | 91.09 | **-3.91** | 90.76 | **-3.91** | 90.76 |
| 0.2 |  | 0.33 | 84.21 | -0.81 | 84.55 | -1.91 | 84.93 | -1.09 | 84.68 | -1.09 | 84.67 |  | 0.13 | 83.74 | -1.60 | 84.21 | **-6.10** | 84.62 | -1.75 | 84.34 | -1.75 | 84.33 |
| 0.5 |  | -0.70 | 67.01 | -1.66 | 67.22 | -1.96 | 67.39 | -1.66 | 67.30 | -1.66 | 67.28 |  | -0.35 | 66.64 | -0.82 | 66.84 | **-2.55** | 67.14 | -0.96 | 66.93 | -0.96 | 66.92 |
| 0.8 |  | -1.84 | 50.94 | -1.84 | 50.90 | **-3.04** | 50.91 | **-3.04** | 50.91 | **-3.04** | 50.87 |  | -0.85 | 50.75 | -0.85 | 50.82 | -1.00 | 50.83 | -0.92 | 50.81 | -0.88 | 50.79 |
| 1 |  | -0.80 | 40.52 | -0.80 | 40.41 | -0.80 | 40.30 | -0.80 | 40.39 | -0.80 | 40.33 |  | -1.71 | 40.85 | -0.90 | 40.74 | -0.62 | 40.63 | -0.62 | 40.72 | -0.62 | 40.67 |
| 1.25 |  | -0.48 | 31.11 | 0.16 | 30.89 | 0.53 | 30.64 | 0.16 | 30.82 | 0.16 | 30.77 |  | **-3.22** | 31.74 | -0.25 | 31.58 | -0.22 | 31.43 | -0.25 | 31.55 | -0.24 | 31.51 |
| 2 |  | -0.75 | 17.85 | 0.35 | 17.48 | 1.10 | 17.15 | 0.35 | 17.35 | 0.69 | 17.27 |  | **-3.09** | 18.66 | -0.33 | 18.42 | 0.54 | 18.17 | -0.32 | 18.33 | -0.29 | 18.29 |
| 5 |  | **-4.56** | 5.78 | 0.62 | 5.27 | 1.55 | 4.84 | 0.97 | 5.13 | 0.97 | 4.99 |  | **-7.56** | 6.43 | 0.06 | 6.09 | 1.12 | 5.73 | 0.78 | 5.94 | 0.78 | 5.87 |
| 10 |  | **-7.36** | 2.33 | 0.23 | 1.83 | 1.46 | 1.41 | 0.84 | 1.67 | 0.84 | 1.37 |  | **-10.14** | 2.78 | 0.16 | 2.38 | 1.14 | 2.05 | 0.49 | 2.29 | 0.49 | 2.14 |
| 20 |  | **-9.66** | 0.90 | 0.07 | 0.43 | 2.74 | 0.17 | 1.38 | 0.33 | 5.00 | 0.00 |  | **-14.57** | 1.18 | -1.21 | 0.81 | 2.12 | 0.53 | -0.75 | 0.68 | 1.18 | 0.39 |
| 0.05 | (80,120) | 1.16 | 94.15 | -0.29 | 94.54 | **-2.86** | 94.94 | -1.43 | 94.68 | -1.43 | 94.68 | (120,100) | 0.53 | 93.96 | **-**1.31 | 94.43 | **-7.51** | 94.88 | **-2.57** | 94.59 | **-2.57** | 94.59 |
| 0.1 |  | 0.87 | 90.83 | -0.39 | 91.17 | **-2.15** | 91.53 | -0.83 | 91.31 | -0.83 | 91.31 |  | 0.58 | 90.58 | -1.08 | 91.01 | **-6.07** | 91.42 | **-2.26** | 91.16 | **-2.26** | 91.15 |
| 0.2 |  | 0.30 | 84.66 | -0.91 | 84.99 | **-2.21** | 85.29 | -1.18 | 85.10 | -1.18 | 85.09 |  | -0.58 | 84.39 | -0.69 | 84.74 | **-3.32** | 85.12 | -1.46 | 84.88 | -1.46 | 84.88 |
| 0.5 |  | -1.02 | 67.56 | -1.41 | 67.72 | **-2.09** | 67.88 | -1.52 | 67.75 | -1.52 | 67.74 |  | -0.41 | 67.42 | -0.84 | 67.60 | -1.66 | 67.83 | -1.66 | 67.64 | -1.66 | 67.63 |
| 0.8 |  | **-2.24** | 51.30 | **-2.37** | 51.37 | **-2.37** | 51.32 | **-2.37** | 51.34 | **-2.37** | 51.31 |  | -1.19 | 51.47 | -1.19 | 51.48 | -1.19 | 51.52 | -1.19 | 51.49 | -1.19 | 51.47 |
| 1 |  | -1.71 | 40.85 | -0.90 | 40.74 | -0.62 | 40.63 | -0.62 | 40.72 | -0.62 | 40.67 |  | -0.79 | 41.43 | -0.46 | 41.31 | -0.46 | 41.23 | -0.46 | 41.28 | -0.46 | 41.23 |
| 1.25 |  | -0.22 | 31.31 | 0.16 | 31.09 | 0.39 | 30.92 | 0.28 | 31.03 | 0.28 | 30.98 |  | -1.87 | 32.11 | -0.06 | 31.99 | -0.00 | 31.90 | -0.00 | 31.96 | -0.00 | 31.92 |
| 2 |  | -0.74 | 17.93 | 0.35 | 17.53 | 0.35 | 17.20 | 0.35 | 17.46 | 0.63 | 17.38 |  | -1.33 | 18.79 | -0.17 | 18.58 | 0.78 | 18.33 | 0.34 | 18.46 | 0.34 | 18.42 |
| 5 |  | **-3.62** | 5.75 | 0.73 | 5.26 | 1.49 | 4.82 | 1.01 | 5.11 | 1.01 | 4.96 |  | **-5.37** | 6.41 | 0.40 | 6.06 | 1.05 | 5.74 | 0.79 | 5.97 | 0.79 | 5.89 |
| 10 |  | **-5.93** | 2.27 | 0.34 | 1.81 | 1.46 | 1.37 | 0.84 | 1.64 | 0.84 | 1.34 |  | **-8.99** | 2.73 | 0.19 | 2.38 | 1.16 | 2.05 | 0.69 | 2.26 | 0.69 | 2.11 |
| 20 |  | -**8.39** | 0.85 | 0.27 | 0.41 | 2.88 | 0.14 | 1.57 | 0.31 | 5.00 | 0.00 |  | -**12.64** | 1.15 | -1.08 | 0.78 | 2.14 | 0.52 | -0.75 | 0.66 | 1.31 | 0.37 |
| 0.05 | (100,80) | 0.34 | 93.44 | **-**1.76 | 93.99 | **-9.33** | 94.56 | **-3.01** | 94.21 | **-3.01** | 94.21 | (120,120) | 0.86 | 94.30 | **-**1.29 | 94.69 | **-4.38** | 95.07 | **-2.86** | 94.83 | **-2.86** | 94.83 |
| 0.1 |  | -0.38 | 89.94 | -1.10 | 90.49 | **-5.64** | 91.02 | -1.68 | 90.65 | -1.57 | 90.64 |  | -0.31 | 90.98 | -0.55 | 91.33 | **-3.36** | 91.69 | -1.16 | 91.46 | -1.16 | 91.46 |
| 0.2 |  | 0.22 | 83.63 | -1.60 | 84.11 | **-2.71** | 84.55 | -1.60 | 84.24 | -1.60 | 84.24 |  | 0.23 | 84.88 | -0.58 | 85.15 | **-2.21** | 85.49 | -1.02 | 85.29 | -1.02 | 85.29 |
| 0.5 |  | -0.46 | 66.48 | -0.87 | 66.70 | -1.22 | 66.95 | -1.17 | 66.83 | -1.17 | 66.81 |  | -1.02 | 67.92 | -1.07 | 68.10 | -1.36 | 68.23 | -1.15 | 68.15 | -1.15 | 68.14 |
| 0.8 |  | -1.59 | 50.59 | -1.38 | 50.58 | -1.38 | 50.65 | -1.38 | 50.59 | -1.38 | 50.57 |  | -1.47 | 51.98 | -1.47 | 51.98 | -1.47 | 52.00 | -1.47 | 51.98 | -1.47 | 51.97 |
| 1 |  | -0.80 | 40.52 | -0.80 | 40.41 | -0.80 | 40.30 | -0.80 | 40.39 | -0.80 | 40.33 |  | -1.28 | 41.83 | -0.32 | 41.72 | -0.32 | 41.66 | -0.32 | 41.70 | -0.32 | 41.66 |
| 1.25 |  | -1.21 | 31.44 | -0.24 | 31.12 | 0.22 | 30.94 | 0.01 | 31.05 | 0.01 | 31.01 |  | -0.44 | 32.37 | 0.13 | 32.22 | 0.37 | 32.09 | 0.19 | 32.18 | 0.19 | 32.15 |
| 2 |  | -1.91 | 18.31 | 0.26 | 17.98 | 0.86 | 17.65 | 0.26 | 17.86 | 0.26 | 17.82 |  | -1.43 | 18.91 | 0.25 | 18.69 | 0.82 | 18.42 | 0.47 | 18.61 | 0.47 | 18.56 |
| 5 |  | **-7.51** | 6.16 | 0.21 | 5.76 | 1.72 | 5.37 | 0.31 | 5.62 | 0.94 | 5.50 |  | **-4.17** | 6.41 | 0.47 | 6.07 | 1.08 | 5.74 | 0.88 | 5.96 | 0.88 | 5.89 |
| 10 |  | **-10.00** | 2.62 | -0.79 | 2.18 | 1.85 | 1.82 | 1.08 | 2.02 | 1.08 | 1.81 |  | **-8.34** | 2.70 | 0.21 | 2.35 | 1.16 | 2.03 | 0.63 | 2.23 | 0.63 | 2.08 |
| 20 |  | **-12.85** | 1.06 | -0.53 | 0.67 | 1.29 | 0.34 | 0.38 | 0.55 | 1.05 | 0.15 |  | -**10.67** | 1.11 | -1.01 | 0.75 | 2.25 | 0.49 | 1.08 | 0.63 | 1.54 | 0.34 |
| 0.05 | (100,100) | 0.78 | 93.89 | -1.31 | 94.34 | **-4.38** | 94.80 | **-**1.51 | 94.50 | -1.51 | 94.50 |  |  |  |  |  |  |  |  |  |  |  |
| 0.1 |  | 0.89 | 90.49 | -0.94 | 90.92 | **-3.35** | 91.34 | **-2.26** | 91.10 | **-2.26** | 91.09 |  |  |  |  |  |  |  |  |  |  |  |
| 0.2 |  | -0.58 | 84.31 | -0.69 | 84.67 | -1.97 | 85.03 | -1.04 | 84.78 | -1.04 | 84.78 |  |  |  |  |  |  |  |  |  |  |  |
| 0.5 |  | -0.62 | 67.22 | -1.66 | 67.41 | -1.66 | 67.62 | -1.66 | 67.54 | -1.66 | 67.53 |  |  |  |  |  |  |  |  |  |  |  |
| 0.8 |  | -1.25 | 51.23 | -1.25 | 51.23 | -1.27 | 51.27 | -1.25 | 51.25 | -1.25 | 51.24 |  |  |  |  |  |  |  |  |  |  |  |
| 1 |  | -1.23 | 41.04 | -0.18 | 40.93 | -0.18 | 40.85 | -0.18 | 40.89 | -0.18 | 40.85 |  |  |  |  |  |  |  |  |  |  |  |
| 1.25 |  | -0.37 | 31.67 | 0.21 | 31.51 | 0.40 | 31.38 | 0.23 | 31.47 | 0.23 | 31.42 |  |  |  |  |  |  |  |  |  |  |  |
| 2 |  | -1.32 | 18.38 | 0.32 | 18.13 | 0.97 | 17.83 | 0.57 | 17.98 | 0.59 | 17.93 |  |  |  |  |  |  |  |  |  |  |  |
| 5 |  | **-4.15** | 6.15 | 0.25 | 5.73 | 1.70 | 5.36 | 0.31 | 5.61 | 0.96 | 5.49 |  |  |  |  |  |  |  |  |  |  |  |
| 10 |  | **-8.38** | 2.57 | -0.78 | 2.14 | 1.91 | 1.77 | 1.10 | 2.01 | 1.10 | 1.80 |  |  |  |  |  |  |  |  |  |  |  |
| 20 |  | -10.81 | 1.01 | -0.37 | 0.64 | 2.94 | 0.31 | 0.48 | 0.52 | 1.24 | 0.11 |  |  |  |  |  |  |  |  |  |  |  |

| *ρ* | (*n*1,*n*2) | ZP0 | | ZP1 | | ZP2 | | ZP3 | | ZP4 | | (*n1* ,*n2*) | ZP0 | | ZP1 | | ZP2 | | ZP3 | | ZP4 | |
| --- | --- | --- | --- | --- | --- | --- | --- | --- | --- | --- | --- | --- | --- | --- | --- | --- | --- | --- | --- | --- | --- | --- |
| 0.05 | (80,80) | 4.79 | 88.92 | 4.50 | 89.47 | 4.35 | 89.97 | 4.35 | 89.67 | 4.35 | 89.67 | (100,120) | 4.72 | 90.74 | 4.64 | 91.10 | 4.28 | 91.47 | 4.50 | 91.23 | 4.50 | 91.23 |
| 0.1 |  | 3.77 | 86.36 | 3.22 | 86.85 | 2.33 | 87.35 | 2.95 | 86.97 | 2.95 | 86.97 |  | 3.42 | 88.14 | 3.37 | 88.49 | 2.03 | 88.83 | 3.18 | 88.60 | 3.18 | 88.60 |
| 0.2 |  | 1.12 | 81.24 | 0.64 | 81.73 | -0.05 | 81.97 | 0.64 | 81.73 | 0.64 | 81.73 |  | 1.37 | 82.97 | 0.30 | 83.27 | 0.00 | 83.57 | 0.30 | 83.38 | 0.30 | 83.38 |
| 0.5 |  | -0.26 | 65.13 | -0.26 | 65.13 | -1.47 | 65.74 | -0.26 | 65.13 | -0.26 | 65.11 |  | -0.17 | 66.78 | -0.53 | 66.94 | -0.91 | 67.11 | -0.74 | 66.98 | -0.74 | 66.97 |
| 0.8 |  | -0.17 | 48.39 | -0.17 | 48.39 | -0.17 | 48.39 | -0.17 | 48.39 | -0.17 | 48.38 |  | -0.34 | 50.09 | -0.40 | 50.14 | -0.47 | 50.18 | -0.40 | 50.16 | -0.40 | 50.14 |
| 1 |  | 0.17 | 37.88 | 0.17 | 37.88 | 0.17 | 37.88 | 0.17 | 37.88 | 0.17 | 37.84 |  | -0.08 | 39.62 | 0.17 | 39.53 | 0.17 | 39.49 | 0.17 | 39.52 | 0.17 | 39.50 |
| 1.25 |  | -0.07 | 29.45 | 0.29 | 29.23 | 0.63 | 29.02 | 0.29 | 29.23 | 0.29 | 29.19 |  | 0.12 | 30.64 | 0.12 | 30.64 | 0.64 | 30.40 | 0.12 | 30.53 | 0.12 | 30.50 |
| 2 |  | 0.04 | 16.60 | 1.07 | 16.10 | 1.07 | 16.10 | 1.07 | 16.10 | 1.07 | 16.06 |  | 0.15 | 17.39 | 0.57 | 17.18 | 1.07 | 16.94 | 0.57 | 17.09 | 0.77 | 17.05 |
| 5 |  | 2.08 | 3.73 | 3.25 | 3.43 | 3.67 | 3.02 | 3.43 | 3.29 | 3.43 | 3.20 |  | 2.33 | 4.15 | 3.34 | 3.83 | 3.67 | 3.53 | 3.47 | 3.73 | 3.47 | 3.67 |
| 10 |  | 4.75 | 0.30 | 4.96 | 0.15 | 4.97 | 0.08 | 4.97 | 0.12 | 5.00 | 0.00 |  | 4.77 | 0.44 | 4.81 | 0.32 | 4.96 | 0.21 | 4.95 | 0.28 | 4.95 | 0.16 |
| 20 |  | 5.00 | 0.00 | 5.00 | 0.00 | 5.00 | 0.00 | 5.00 | 0.00 | 5.00 | 0.00 |  | 5.00 | 0.00 | 5.00 | 0.00 | 5.00 | 0.00 | 5.00 | 0.00 | 5.00 | 0.00 |
| 0.05 | (80,100) | 4.57 | 90.14 | 4.57 | 90.56 | 4.23 | 90.99 | 4.57 | 90.69 | 4.57 | 90.69 | (120,80) | 4.79 | 88.50 | 4.77 | 89.04 | 4.35 | 89.59 | 4.67 | 89.24 | 4.67 | 89.24 |
| 0.1 |  | 3.46 | 87.56 | 2.94 | 87.94 | 2.64 | 88.30 | 2.94 | 88.06 | 2.94 | 88.06 |  | 3.77 | 86.01 | 3.77 | 86.49 | 3.02 | 86.97 | 3.47 | 86.66 | 3.47 | 86.66 |
| 0.2 |  | 1.39 | 82.30 | -0.58 | 82.64 | -0.58 | 83.05 | -0.58 | 82.80 | -0.58 | 82.79 |  | 1.12 | 80.91 | 1.12 | 81.35 | 0.65 | 81.79 | 1.05 | 81.51 | 1.05 | 81.51 |
| 0.5 |  | -0.10 | 65.91 | -0.58 | 66.14 | -1.11 | 66.34 | -0.85 | 66.21 | -0.85 | 66.20 |  | -0.35 | 65.43 | -0.35 | 65.48 | -1.17 | 65.81 | -0.35 | 65.65 | -0.35 | 65.65 |
| 0.8 |  | -0.80 | 49.50 | -0.80 | 49.43 | -0.80 | 49.36 | -0.80 | 49.38 | -0.80 | 49.38 |  | -0.04 | 49.06 | -0.17 | 49.14 | -0.19 | 49.19 | -0.17 | 49.15 | -0.17 | 49.14 |
| 1 |  | 0.05 | 38.52 | 0.05 | 38.50 | 0.08 | 38.42 | 0.05 | 38.47 | 0.05 | 38.43 |  | 0.01 | 38.93 | 0.01 | 38.90 | 0.01 | 38.82 | 0.01 | 38.85 | 0.01 | 38.82 |
| 1.25 |  | 0.04 | 29.78 | 0.30 | 29.61 | 0.54 | 29.43 | 0.39 | 29.54 | 0.39 | 29.52 |  | -0.00 | 30.43 | 0.26 | 30.28 | 0.52 | 30.16 | 0.29 | 30.24 | 0.29 | 30.21 |
| 2 |  | 0.19 | 16.64 | 0.35 | 16.43 | 1.11 | 16.07 | 1.01 | 16.23 | 1.01 | 16.20 |  | -0.02 | 17.69 | 0.80 | 17.41 | 1.17 | 17.21 | 0.80 | 17.32 | 0.80 | 17.30 |
| 5 |  | 2.13 | 3.61 | 3.39 | 3.29 | 3.68 | 2.98 | 3.51 | 3.18 | 3.51 | 3.09 |  | 1.12 | 4.74 | 2.49 | 4.52 | 2.82 | 4.26 | 2.74 | 4.42 | 2.74 | 4.38 |
| 10 |  | 4.77 | 0.24 | 4.97 | 0.12 | 4.98 | 0.05 | 4.97 | 0.10 | 5.00 | 0.00 |  | 4.40 | 0.85 | 4.76 | 0.68 | 4.83 | 0.54 | 4.80 | 0.62 | 4.80 | 0.54 |
| 20 |  | 5.00 | 0.00 | 5.00 | 0.00 | 5.00 | 0.00 | 5.00 | 0.00 | 5.00 | 0.00 |  | 5.00 | 0.00 | 5.00 | 0.00 | 5.00 | 0.00 | 5.00 | 0.00 | 5.00 | 0.00 |
| 0.05 | (80,120) | 4.72 | 90.98 | 4.28 | 91.36 | 4.28 | 91.72 | 4.28 | 91.48 | 4.28 | 91.48 | (120,100) | 4.85 | 89.67 | 4.57 | 90.12 | 4.57 | 90.56 | 4.57 | 90.29 | 4.57 | 90.29 |
| 0.1 |  | 3.42 | 88.37 | 2.76 | 88.71 | 2.03 | 89.05 | 2.03 | 88.83 | 2.03 | 88.83 |  | 4.00 | 87.09 | 3.52 | 87.50 | 2.94 | 87.93 | 2.94 | 87.67 | 2.94 | 87.66 |
| 0.2 |  | 0.30 | 83.10 | 0.17 | 83.44 | -0.65 | 83.74 | 0.09 | 83.54 | 0.09 | 83.54 |  | 1.58 | 82.10 | 1.04 | 82.42 | -0.58 | 82.76 | 1.04 | 82.49 | 1.04 | 82.49 |
| 0.5 |  | -0.31 | 66.64 | -0.76 | 66.74 | -1.21 | 66.91 | -0.76 | 66.78 | -0.76 | 66.77 |  | -0.10 | 66.21 | -0.58 | 66.43 | -0.97 | 66.64 | -0.59 | 66.51 | -0.59 | 66.51 |
| 0.8 |  | -0.10 | 49.59 | -0.10 | 49.61 | -0.26 | 49.67 | -0.10 | 49.62 | -0.10 | 49.60 |  | 0.03 | 49.83 | 0.03 | 49.83 | 0.03 | 49.96 | 0.03 | 49.89 | 0.03 | 49.88 |
| 1 |  | 0.01 | 38.93 | 0.01 | 38.90 | 0.01 | 38.82 | 0.01 | 38.85 | 0.01 | 38.82 |  | -0.08 | 39.62 | 0.17 | 39.53 | 0.17 | 39.49 | 0.17 | 39.52 | 0.17 | 39.50 |
| 1.25 |  | 0.06 | 30.00 | 0.29 | 29.87 | 0.43 | 29.72 | 0.30 | 29.83 | 0.30 | 29.80 |  | 0.01 | 30.86 | 0.11 | 30.73 | 0.26 | 30.62 | 0.14 | 30.70 | 0.14 | 30.68 |
| 2 |  | -0.10 | 16.84 | 0.35 | 16.50 | 1.28 | 16.16 | 0.35 | 16.37 | 0.63 | 16.32 |  | 0.10 | 17.81 | 0.77 | 17.57 | 1.08 | 17.39 | 0.77 | 17.53 | 0.77 | 17.51 |
| 5 |  | 2.13 | 3.52 | 3.47 | 3.21 | 3.68 | 2.93 | 3.56 | 3.11 | 3.56 | 3.02 |  | 2.37 | 4.65 | 2.78 | 4.41 | 3.42 | 4.16 | 2.78 | 4.32 | 3.15 | 4.27 |
| 10 |  | 4.78 | 0.21 | 4.97 | 0.10 | 4.98 | 0.03 | 4.97 | 0.08 | 5.00 | 0.00 |  | 4.43 | 0.75 | 4.80 | 0.61 | 4.84 | 0.47 | 4.81 | 0.56 | 4.81 | 0.48 |
| 20 |  | 5.00 | 0.00 | 5.00 | 0.00 | 5.00 | 0.00 | 5.00 | 0.00 | 5.00 | 0.00 |  | 5.00 | 0.00 | 5.00 | 0.00 | 5.00 | 0.00 | 5.00 | 0.00 | 5.00 | 0.00 |
| 0.05 | (100,80) | 4.79 | 88.69 | 4.68 | 89.23 | 4.35 | 89.77 | 4.58 | 89.40 | 4.58 | 89.40 | (120,120) | 4.72 | 90.56 | 4.72 | 90.93 | 4.42 | 91.30 | 4.67 | 91.05 | 4.67 | 91.05 |
| 0.1 |  | 3.77 | 86.13 | 3.60 | 86.62 | 2.33 | 87.14 | 3.29 | 86.81 | 3.29 | 86.81 |  | 3.76 | 87.97 | 3.42 | 88.31 | 3.06 | 88.63 | 3.40 | 88.47 | 3.40 | 88.47 |
| 0.2 |  | 1.12 | 81.04 | 1.12 | 81.47 | 0.39 | 81.90 | 0.88 | 81.62 | 0.88 | 81.62 |  | 1.73 | 82.81 | 0.30 | 83.14 | 0.30 | 83.47 | 0.30 | 83.31 | 0.30 | 83.30 |
| 0.5 |  | -0.09 | 65.19 | -0.54 | 65.43 | -1.03 | 65.71 | -0.54 | 65.54 | -0.54 | 65.54 |  | 0.21 | 66.74 | -0.69 | 67.15 | -0.69 | 67.15 | -0.69 | 67.15 | -0.69 | 67.15 |
| 0.8 |  | -0.13 | 48.80 | -0.14 | 48.82 | -0.27 | 48.89 | -0.14 | 48.83 | -0.14 | 48.82 |  | 0.01 | 50.41 | 0.01 | 50.41 | -0.30 | 50.58 | -0.30 | 50.58 | -0.30 | 50.57 |
| 1 |  | 0.05 | 38.52 | 0.05 | 38.50 | 0.08 | 38.42 | 0.05 | 38.47 | 0.05 | 38.43 |  | -0.32 | 40.20 | -0.32 | 40.20 | -0.32 | 40.20 | -0.32 | 40.20 | -0.32 | 40.17 |
| 1.25 |  | -0.70 | 30.38 | 0.84 | 29.52 | 0.84 | 29.52 | 0.84 | 29.52 | 0.84 | 29.50 |  | 0.09 | 31.13 | 0.38 | 30.99 | 0.38 | 30.99 | 0.38 | 30.99 | 0.38 | 30.97 |
| 2 |  | 0.20 | 17.15 | 0.67 | 16.93 | 1.28 | 16.67 | 0.87 | 16.83 | 0.87 | 16.80 |  | 0.47 | 17.77 | 0.47 | 17.77 | 1.25 | 17.42 | 0.47 | 17.77 | 0.47 | 17.74 |
| 5 |  | 2.18 | 4.29 | 2.47 | 3.97 | 3.59 | 3.70 | 2.47 | 3.97 | 3.18 | 3.90 |  | 2.50 | 4.54 | 2.79 | 4.32 | 3.54 | 4.10 | 2.82 | 4.21 | 3.39 | 4.16 |
| 10 |  | 4.69 | 0.59 | 4.78 | 0.44 | 4.95 | 0.29 | 4.80 | 0.37 | 4.80 | 0.26 |  | 4.75 | 0.68 | 4.82 | 0.55 | 4.95 | 0.41 | 4.84 | 0.52 | 4.84 | 0.44 |
| 20 |  | 5.00 | 0.00 | 5.00 | 0.00 | 5.00 | 0.00 | 5.00 | 0.00 | 5.00 | 0.00 |  | 5.00 | 0.00 | 5.00 | 0.00 | 5.00 | 0.00 | 5.00 | 0.00 | 5.00 | 0.00 |
| 0.05 | (100,100) | 4.79 | 89.97 | 4.57 | 90.32 | 4.53 | 90.72 | 4.57 | 90.47 | 4.57 | 90.47 |  |  |  |  |  |  |  |  |  |  |  |
| 0.1 |  | 3.88 | 87.28 | 2.94 | 87.68 | 2.94 | 88.07 | 2.94 | 87.87 | 2.94 | 87.87 |  |  |  |  |  |  |  |  |  |  |  |
| 0.2 |  | 1.58 | 82.18 | 0.65 | 82.57 | -0.58 | 82.78 | 0.65 | 82.57 | 0.65 | 82.57 |  |  |  |  |  |  |  |  |  |  |  |
| 0.5 |  | -0.08 | 66.09 | -0.08 | 66.09 | -1.12 | 66.58 | -1.12 | 66.58 | -1.12 | 66.57 |  |  |  |  |  |  |  |  |  |  |  |
| 0.8 |  | 0.00 | 49.50 | 0.00 | 49.50 | -0.33 | 49.70 | 0.00 | 49.50 | 0.00 | 49.50 |  |  |  |  |  |  |  |  |  |  |  |
| 1 |  | -0.18 | 39.26 | -0.18 | 39.26 | -0.18 | 39.26 | -0.18 | 39.26 | -0.18 | 39.24 |  |  |  |  |  |  |  |  |  |  |  |
| 1.25 |  | 0.10 | 30.36 | 0.41 | 30.19 | 0.41 | 30.19 | 0.41 | 30.19 | 0.41 | 30.17 |  |  |  |  |  |  |  |  |  |  |  |
| 2 |  | 0.20 | 17.29 | 1.09 | 16.88 | 1.09 | 16.88 | 1.09 | 16.88 | 1.09 | 16.86 |  |  |  |  |  |  |  |  |  |  |  |
| 5 |  | 2.28 | 4.21 | 2.47 | 3.95 | 3.64 | 3.59 | 3.37 | 3.82 | 3.37 | 3.76 |  |  |  |  |  |  |  |  |  |  |  |
| 10 |  | 4.75 | 0.50 | 4.80 | 0.35 | 4.96 | 0.24 | 4.94 | 0.29 | 4.95 | 0.19 |  |  |  |  |  |  |  |  |  |  |  |
| 20 |  | 5.00 | 0.00 | 5.00 | 0.00 | 5.00 | 0.00 | 5.00 | 0.00 | 5.00 | 0.00 |  |  |  |  |  |  |  |  |  |  |  |

| *ρ* | (*n*1,*n*2) | ZE0 | | ZE1 | | ZE2 | | ZE3 | | ZE4 | | (*n1* ,*n2*) | ZE0 | | ZE1 | | ZE2 | | ZE3 | | ZE4 | |
| --- | --- | --- | --- | --- | --- | --- | --- | --- | --- | --- | --- | --- | --- | --- | --- | --- | --- | --- | --- | --- | --- | --- |
| 0.05 | (80,80) | **-4.38** | 94.18 | **-15.38** | 94.74 | **-25.99** | 95.26 | **-18.09** | 94.91 | **-18.09** | 94.91 | (100,120) | **-6.18** | 94.89 | **-12.59** | 95.23 | **-25.05** | 95.62 | **-15.78** | 95.36 | **-15.78** | 95.36 |
| 0.1 |  | **-3.34** | 90.57 | **-8.20** | 91.10 | **-18.02** | 91.60 | **-13.13** | 91.31 | **-13.13** | 91.31 |  | **-4.98** | 91.45 | **-10.71** | 91.83 | **-16.41** | 92.14 | **-10.71** | 91.95 | **-10.71** | 91.95 |
| 0.2 |  | **-2.94** | 84.07 | **-5.64** | 84.53 | **-11.22** | 84.94 | **-11.22** | 84.68 | **-8.45** | 84.67 |  | **-3.83** | 85.19 | **-5.05** | 85.50 | **-6.31** | 85.79 | **-5.06** | 85.58 | **-4.31** | 85.57 |
| 0.5 |  | -1.79 | 66.42 | -1.80 | 66.62 | **-2.28** | 66.88 | -1.80 | 66.74 | -1.61 | 66.73 |  | -0.63 | 67.89 | -1.02 | 68.02 | -1.40 | 68.20 | -1.02 | 68.06 | -1.02 | 68.05 |
| 0.8 |  | -0.65 | 50.11 | -0.65 | 50.11 | -0.65 | 50.10 | -0.65 | 50.11 | -0.65 | 50.08 |  | -0.69 | 51.62 | -0.47 | 51.63 | -0.64 | 51.67 | -0.53 | 51.64 | -0.53 | 51.62 |
| 1 |  | -1.17 | 39.98 | -0.09 | 39.80 | 0.06 | 39.73 | 0.06 | 39.77 | 0.06 | 39.70 |  | -0.79 | 41.43 | -0.46 | 41.31 | -0.46 | 41.23 | -0.46 | 41.28 | -0.46 | 41.23 |
| 1.25 |  | -1.60 | 30.79 | 0.25 | 30.54 | 0.31 | 30.39 | 0.29 | 30.53 | 0.29 | 30.47 |  | -0.58 | 31.95 | -0.58 | 31.83 | -0.58 | 31.60 | -0.58 | 31.75 | 0.04 | 31.72 |
| 2 |  | -0.14 | 17.54 | 0.35 | 17.19 | 1.07 | 16.86 | 0.35 | 17.06 | 0.76 | 16.98 |  | 0.05 | 18.35 | 0.23 | 18.08 | 0.57 | 17.81 | 0.57 | 17.99 | 0.65 | 17.93 |
| 5 |  | -0.65 | 5.35 | 1.62 | 4.89 | 2.08 | 4.45 | 1.62 | 4.74 | 1.62 | 4.59 |  | 0.09 | 5.79 | 0.31 | 5.40 | 1.97 | 5.06 | 1.74 | 5.27 | 1.74 | 5.17 |
| 10 |  | 0.34 | 1.84 | 1.45 | 1.42 | 3.42 | 1.07 | 2.89 | 1.27 | 2.89 | 0.98 |  | -0.76 | 2.11 | 1.79 | 1.75 | 2.58 | 1.43 | 2.20 | 1.64 | 2.20 | 1.45 |
| 20 |  | 0.23 | 0.43 | 2.81 | 0.17 | 5.00 | 0.00 | 3.24 | 0.08 | 5.00 | 0.00 |  | -0.15 | 0.60 | 3.08 | 0.29 | 4.09 | 0.14 | 3.55 | 0.24 | 5.00 | 0.00 |
| 0.05 | (80,100) | **-3.36** | 94.55 | **-13.28** | 95.01 | **-23.04** | 95.45 | **-16.59** | 95.18 | **-16.58** | 95.18 | (120,80) | **-7.06** | 94.21 | **-16.74** | 94.76 | **-27.72** | 95.28 | **-20.50** | 94.93 | **-20.50** | 94.93 |
| 0.1 |  | **-5.39** | 91.08 | **-11.23** | 91.48 | **-17.23** | 91.90 | **-11.33** | 91.65 | **-11.33** | 91.65 |  | **-3.91** | 90.62 | **-14.37** | 91.16 | **-21.24** | 91.65 | **-17.83** | 91.35 | **-17.83** | 91.35 |
| 0.2 |  | **-4.19** | 84.66 | **-5.63** | 85.03 | **-5.64** | 85.38 | **-5.63** | 85.17 | **-4.82** | 85.16 |  | **-6.10** | 84.24 | **-6.29** | 84.63 | **-12.40** | 85.07 | **-12.27** | 84.82 | **-12.27** | 84.82 |
| 0.5 |  | -1.00 | 67.17 | -1.66 | 67.30 | -1.66 | 67.50 | -1.66 | 67.38 | -1.66 | 67.36 |  | **-7.29** | 66.81 | **-2.75** | 66.99 | **-7.36** | 67.27 | **-2.75** | 67.06 | **-2.57** | 67.05 |
| 0.8 |  | -1.19 | 50.84 | -0.80 | 50.83 | -0.80 | 50.83 | -0.80 | 50.84 | -0.80 | 50.81 |  | **-2.86** | 50.76 | **-2.86** | 50.75 | **-2.86** | 50.78 | **-2.86** | 50.76 | **-2.16** | 50.74 |
| 1 |  | -0.80 | 40.52 | -0.80 | 40.41 | -0.80 | 40.30 | -0.80 | 40.39 | -0.80 | 40.33 |  | -1.71 | 40.85 | -0.90 | 40.74 | -0.62 | 40.63 | -0.62 | 40.72 | -0.62 | 40.67 |
| 1.25 |  | -1.60 | 31.17 | -0.36 | 30.91 | 0.16 | 30.75 | -0.36 | 30.85 | -0.15 | 30.79 |  | -0.42 | 31.82 | -0.22 | 31.67 | -0.22 | 31.51 | -0.22 | 31.62 | -0.22 | 31.57 |
| 2 |  | -0.00 | 17.65 | 0.35 | 17.31 | 0.35 | 16.97 | 0.35 | 17.20 | 0.77 | 17.13 |  | -0.33 | 18.58 | 0.54 | 18.29 | 0.88 | 18.08 | 0.73 | 18.24 | 0.73 | 18.19 |
| 5 |  | -0.65 | 5.35 | 1.55 | 4.90 | 1.97 | 4.49 | 1.78 | 4.75 | 1.78 | 4.61 |  | 0.31 | 6.06 | 1.00 | 5.72 | 2.14 | 5.40 | 1.12 | 5.60 | 1.71 | 5.52 |
| 10 |  | 0.23 | 1.85 | 1.40 | 1.42 | 3.40 | 1.06 | 2.73 | 1.27 | 2.73 | 0.99 |  | 0.49 | 2.32 | 1.18 | 1.99 | 2.90 | 1.71 | 2.51 | 1.88 | 2.51 | 1.74 |
| 20 |  | -0.07 | 0.43 | 2.82 | 0.16 | 5.00 | 0.00 | 3.23 | 0.07 | 5.00 | 0.00 |  | -0.76 | 0.70 | 2.57 | 0.46 | 3.44 | 0.24 | 3.04 | 0.38 | 3.27 | 0.11 |
| 0.05 | (80,120) | **-4.98** | 94.87 | **-12.71** | 95.21 | **-24.08** | 95.60 | **-16.57** | 95.36 | **-16.57** | 95.36 | (120,100) | **-5.17** | 94.59 | **-14.56** | 95.03 | **-27.96** | 95.47 | **-19.17** | 95.20 | **-19.17** | 95.20 |
| 0.1 |  | -1.88 | 91.43 | **-7.47** | 91.79 | **-14.29** | 92.12 | **-8.35** | 91.89 | **-8.35** | 91.89 |  | **-6.07** | 91.13 | **-10.28** | 91.52 | **-22.76** | 91.97 | **-14.51** | 91.67 | **-14.51** | 91.67 |
| 0.2 |  | **-6.02** | 85.09 | **-6.07** | 85.42 | **-6.07** | 85.74 | **-6.07** | 85.51 | **-3.67** | 85.50 |  | **-3.31** | 84.80 | **-8.59** | 85.14 | **-16.32** | 85.53 | **-8.91** | 85.30 | **-8.91** | 85.30 |
| 0.5 |  | -0.98 | 67.69 | -1.50 | 67.85 | -1.50 | 68.00 | -1.50 | 67.89 | -1.50 | 67.87 |  | -0.76 | 67.47 | -1.90 | 67.74 | **-2.49** | 67.89 | -1.90 | 67.75 | -1.88 | 67.74 |
| 0.8 |  | -0.73 | 51.21 | -0.32 | 51.16 | -1.47 | 51.18 | -0.46 | 51.18 | -0.46 | 51.15 |  | -1.71 | 51.44 | -0.93 | 51.44 | -0.73 | 51.48 | -0.73 | 51.45 | -0.73 | 51.44 |
| 1 |  | -1.71 | 40.85 | -0.90 | 40.74 | -0.62 | 40.63 | -0.62 | 40.72 | -0.62 | 40.67 |  | -0.79 | 41.43 | -0.46 | 41.31 | -0.46 | 41.23 | -0.46 | 41.28 | -0.46 | 41.23 |
| 1.25 |  | -1.60 | 31.35 | -1.60 | 31.13 | 0.10 | 30.96 | -0.06 | 31.06 | -0.06 | 31.02 |  | -0.35 | 32.16 | -0.00 | 32.03 | -0.00 | 31.90 | -0.00 | 31.99 | -0.00 | 31.95 |
| 2 |  | -0.10 | 17.79 | 0.14 | 17.40 | 0.35 | 17.08 | 0.35 | 17.30 | 0.63 | 17.23 |  | -0.20 | 18.72 | 0.61 | 18.46 | 0.88 | 18.26 | 0.74 | 18.39 | 0.74 | 18.35 |
| 5 |  | -0.65 | 5.38 | 1.26 | 4.90 | 2.02 | 4.48 | 1.70 | 4.78 | 1.70 | 4.63 |  | 0.35 | 6.06 | 1.05 | 5.75 | 2.07 | 5.44 | 1.12 | 5.64 | 1.63 | 5.56 |
| 10 |  | 0.15 | 1.85 | 1.42 | 1.42 | 3.30 | 1.07 | 2.72 | 1.28 | 2.72 | 0.99 |  | 0.19 | 2.32 | 1.16 | 2.00 | 2.92 | 1.72 | 2.45 | 1.88 | 2.45 | 1.74 |
| 20 |  | -0.05 | 0.43 | 2.75 | 0.16 | 5.00 | 0.00 | 3.22 | 0.07 | 5.00 | 0.00 |  | -0.76 | 0.70 | 2.51 | 0.46 | 3.42 | 0.25 | 2.91 | 0.39 | 3.19 | 0.12 |
| 0.05 | (100,80) | **-4.78** | 94.19 | **-16.13** | 94.74 | **-26.95** | 95.27 | **-20.56** | 94.93 | **-20.56** | 94.93 | (120,120) | **-4.38** | 94.88 | **-15.33** | 95.25 | **-25.84** | 95.62 | **-18.02** | 95.38 | **-18.02** | 95.38 |
| 0.1 |  | **-5.63** | 90.62 | **-13.80** | 91.14 | **-21.82** | 91.64 | **-13.80** | 91.33 | **-13.80** | 91.33 |  | **-3.36** | 91.48 | **-8.21** | 91.82 | **-18.01** | 92.17 | **-13.13** | 91.95 | **-13.13** | 91.95 |
| 0.2 |  | **-2.71** | 84.16 | **-8.33** | 84.59 | **-15.51** | 85.04 | **-8.33** | 84.77 | **-8.33** | 84.77 |  | **-2.97** | 85.26 | **-5.70** | 85.53 | **-11.24** | 85.85 | **-11.24** | 85.67 | **-8.49** | 85.66 |
| 0.5 |  | -1.06 | 66.65 | -1.37 | 66.83 | **-3.06** | 67.07 | **-2.58** | 66.90 | **-2.29** | 66.89 |  | -1.88 | 68.03 | -1.89 | 68.21 | -1.89 | 68.36 | -1.89 | 68.26 | -1.26 | 68.25 |
| 0.8 |  | -1.25 | 50.51 | -1.04 | 50.52 | -1.04 | 50.54 | -1.04 | 50.54 | -1.02 | 50.53 |  | -0.73 | 51.94 | -0.55 | 51.96 | -0.54 | 51.96 | -0.55 | 51.96 | -0.55 | 51.95 |
| 1 |  | -0.80 | 40.52 | -0.80 | 40.41 | -0.80 | 40.30 | -0.80 | 40.39 | -0.80 | 40.33 |  | -1.28 | 41.83 | -0.32 | 41.72 | -0.32 | 41.66 | -0.32 | 41.70 | -0.32 | 41.66 |
| 1.25 |  | -1.21 | 31.49 | 0.02 | 31.18 | 0.34 | 30.99 | 0.12 | 31.11 | 0.12 | 31.06 |  | -0.20 | 32.39 | 0.01 | 32.28 | 0.01 | 32.14 | 0.01 | 32.25 | 0.03 | 32.22 |
| 2 |  | -0.15 | 18.12 | 0.57 | 17.83 | 1.19 | 17.54 | 0.57 | 17.74 | 0.87 | 17.68 |  | -0.18 | 18.80 | 0.37 | 18.57 | 0.84 | 18.33 | 0.47 | 18.51 | 0.47 | 18.48 |
| 5 |  | 0.21 | 5.76 | 1.46 | 5.37 | 2.18 | 5.01 | 1.78 | 5.23 | 1.78 | 5.13 |  | 0.26 | 6.09 | 0.88 | 5.77 | 2.03 | 5.46 | 1.08 | 5.65 | 1.67 | 5.57 |
| 10 |  | -0.76 | 2.09 | 2.06 | 1.74 | 2.61 | 1.43 | 2.25 | 1.63 | 2.25 | 1.43 |  | 0.21 | 2.32 | 1.16 | 2.00 | 2.81 | 1.71 | 2.40 | 1.88 | 2.40 | 1.74 |
| 20 |  | -0.02 | 0.60 | 3.20 | 0.29 | 4.14 | 0.13 | 3.66 | 0.23 | 5.00 | 0.00 |  | -0.80 | 0.71 | 2.46 | 0.46 | 3.40 | 0.26 | 2.89 | 0.39 | 3.17 | 0.12 |
| 0.05 | (100,100) | **-4.38** | 94.59 | **-15.35** | 95.05 | **-25.90** | 95.47 | **-18.05** | 95.19 | **-18.05** | 95.19 |  |  |  |  |  |  |  |  |  |  |  |
| 0.1 |  | **-3.35** | 91.11 | **-8.20** | 91.53 | **-18.01** | 91.93 | **-13.13** | 91.68 | **-13.13** | 91.68 |  |  |  |  |  |  |  |  |  |  |  |
| 0.2 |  | **-2.96** | 84.75 | **-5.67** | 85.11 | **-11.23** | 85.46 | **-11.23** | 85.25 | **-8.47** | 85.24 |  |  |  |  |  |  |  |  |  |  |  |
| 0.5 |  | -1.85 | 67.36 | -1.85 | 67.55 | -1.85 | 67.73 | -1.85 | 67.63 | -1.66 | 67.61 |  |  |  |  |  |  |  |  |  |  |  |
| 0.8 |  | -0.97 | 51.17 | -0.97 | 51.19 | -0.97 | 51.21 | -0.97 | 51.21 | -0.97 | 51.19 |  |  |  |  |  |  |  |  |  |  |  |
| 1 |  | -1.23 | 41.04 | -0.18 | 40.93 | -0.18 | 40.85 | -0.18 | 40.89 | -0.18 | 40.85 |  |  |  |  |  |  |  |  |  |  |  |
| 1.25 |  | -0.99 | 31.75 | -0.60 | 31.58 | 0.39 | 31.35 | -0.58 | 31.48 | 0.23 | 31.43 |  |  |  |  |  |  |  |  |  |  |  |
| 2 |  | -0.15 | 18.25 | 0.38 | 18.00 | 0.57 | 17.70 | 0.57 | 17.88 | 0.59 | 17.83 |  |  |  |  |  |  |  |  |  |  |  |
| 5 |  | 0.00 | 5.75 | 1.46 | 5.38 | 2.06 | 5.02 | 1.79 | 5.24 | 1.79 | 5.15 |  |  |  |  |  |  |  |  |  |  |  |
| 10 |  | -0.76 | 2.09 | 1.91 | 1.74 | 2.62 | 1.41 | 2.22 | 1.63 | 2.22 | 1.44 |  |  |  |  |  |  |  |  |  |  |  |
| 20 |  | -0.01 | 0.60 | 3.13 | 0.29 | 4.11 | 0.14 | 3.60 | 0.24 | 5.00 | 0.00 |  |  |  |  |  |  |  |  |  |  |  |

| *ρ* | (*n*1,*n*2) | LW0 | | LW1 | | LW2 | | LW3 | | LW4 | | (*n1* ,*n2*) | LW0 | | LW1 | | LW2 | | LW3 | | LW4 | |
| --- | --- | --- | --- | --- | --- | --- | --- | --- | --- | --- | --- | --- | --- | --- | --- | --- | --- | --- | --- | --- | --- | --- |
| 0.05 | (80,80) | -**3.80** | 92.93 | **-12.63** | 94.70 | **-23.41** | 95.23 | **-15.38** | 94.89 | **-15.38** | 94.89 | (100,120) | **-2.86** | 93.86 | **-12.59** | 95.21 | **-22.03** | 95.60 | **-15.78** | 95.34 | **-15.78** | 95.34 |
| 0.1 |  | -1.65 | 89.36 | **-8.20** | 91.14 | **-18.02** | 91.62 | **-13.13** | 91.30 | **-13.13** | 91.30 |  | -1.65 | 90.47 | **-5.04** | 91.80 | **-16.41** | 92.15 | **-10.71** | 91.92 | **-10.71** | 91.92 |
| 0.2 |  | -1.60 | 82.96 | **-3.04** | 84.58 | **-6.47** | 85.05 | **-3.67** | 84.77 | **-3.67** | 84.76 |  | **-2.21** | 84.28 | **-2.83** | 85.54 | **-5.06** | 85.85 | **-4.15** | 85.63 | **-4.15** | 85.63 |
| 0.5 |  | **-2.28** | 65.40 | **-2.28** | 66.80 | **-2.94** | 67.00 | **-2.28** | 66.88 | **-2.28** | 66.86 |  | -1.40 | 67.02 | -1.90 | 68.12 | **-3.53** | 68.29 | **-2.30** | 68.19 | **-2.30** | 68.19 |
| 0.8 |  | **-5.06** | 49.08 | **-5.06** | 50.27 | **-2.21** | 50.28 | **-5.06** | 50.28 | **-5.06** | 50.25 |  | **-2.06** | 50.66 | **-2.06** | 51.62 | **-2.06** | 51.65 | **-2.06** | 51.63 | **-2.06** | 51.62 |
| 1 |  | -1.17 | 38.67 | 0.17 | 39.66 | 0.17 | 39.60 | 0.17 | 39.63 | 0.17 | 39.55 |  | -0.17 | 40.26 | 0.10 | 41.09 | 0.19 | 40.98 | 0.10 | 41.07 | 0.10 | 41.04 |
| 1.25 |  | 0.39 | 29.25 | 0.59 | 30.18 | 0.92 | 29.98 | 0.73 | 30.15 | 0.73 | 30.12 |  | 0.40 | 30.68 | 0.64 | 31.45 | 0.90 | 31.29 | 0.64 | 31.38 | 0.64 | 31.35 |
| 2 |  | 0.75 | 16.00 | 1.26 | 16.77 | 1.91 | 16.46 | 1.53 | 16.64 | 1.53 | 16.58 |  | 0.57 | 17.09 | 1.22 | 17.73 | 1.77 | 17.47 | 1.45 | 17.63 | 1.45 | 17.60 |
| 5 |  | 1.28 | 4.02 | 2.08 | 4.47 | 3.04 | 4.16 | 2.08 | 4.37 | 2.74 | 4.27 |  | 0.31 | 4.70 | 1.97 | 5.11 | 2.44 | 4.80 | 2.17 | 5.01 | 2.17 | 4.94 |
| 10 |  | 1.25 | 0.76 | 3.18 | 0.99 | 3.78 | 0.81 | 3.42 | 0.94 | 3.42 | 0.76 |  | 1.30 | 1.17 | 2.32 | 1.44 | 3.62 | 1.22 | 2.58 | 1.37 | 2.58 | 1.24 |
| 20 |  | 5.00 | 0.00 | 5.00 | 0.00 | 5.00 | 0.00 | 5.00 | 0.00 | 5.00 | 0.00 |  | 5.00 | 0.00 | 5.00 | 0.00 | 5.00 | 0.00 | 4.41 | 0.02 | 5.00 | 0.00 |
| 0.05 | (80,100) | **-2.35** | 93.33 | **-9.95** | 94.99 | **-23.04** | 95.43 | **-13.28** | 95.15 | **-13.28** | 95.15 | (120,80) | **4.98** | 93.35 | **-14.83** | 94.71 | **-25.96** | 95.26 | **-18.63** | 94.90 | **-18.63** | 94.90 |
| 0.1 |  | **-2.26** | 89.85 | **-5.45** | 91.47 | **-11.37** | 91.90 | **-11.33** | 91.64 | **-11.33** | 91.64 |  | **-2.77** | 89.83 | **-10.87** | 91.15 | **-21.24** | 91.67 | **-14.37** | 91.35 | **-14.37** | 91.35 |
| 0.2 |  | -1.09 | 83.51 | **-3.75** | 85.08 | **-5.64** | 85.42 | **-3.75** | 85.21 | **-3.75** | 85.21 |  | -1.60 | 83.45 | **-6.10** | 84.72 | **-12.40** | 85.17 | **-6.29** | 84.89 | **-6.29** | 84.89 |
| 0.5 |  | -1.66 | 66.07 | **-2.06** | 67.39 | **-2.47** | 67.60 | **-2.07** | 67.49 | **-2.07** | 67.46 |  | **-2.28** | 66.23 | **-2.55** | 67.27 | **-2.75** | 67.49 | **-2.55** | 67.40 | **-2.55** | 67.39 |
| 0.8 |  | **-3.18** | 49.53 | **-3.18** | 50.74 | **-3.18** | 50.83 | **-3.18** | 50.76 | **-3.18** | 50.74 |  | **-5.06** | 50.26 | **-2.07** | 51.07 | **-2.07** | 51.11 | **-2.07** | 51.10 | **-2.07** | 51.09 |
| 1 |  | 0.27 | 38.99 | 0.28 | 40.04 | 0.42 | 39.89 | 0.38 | 39.98 | 0.38 | 39.95 |  | **-3.94** | 40.18 | -0.29 | 40.82 | -0.35 | 40.75 | -0.25 | 40.79 | -0.25 | 40.74 |
| 1.25 |  | 0.52 | 29.48 | 0.75 | 30.49 | 1.01 | 30.25 | 0.87 | 30.38 | 0.87 | 30.34 |  | -0.22 | 30.96 | -0.22 | 31.57 | -0.22 | 31.43 | -0.22 | 31.52 | -0.22 | 31.50 |
| 2 |  | 0.88 | 16.12 | 1.45 | 16.87 | 2.01 | 16.54 | 1.60 | 16.78 | 1.60 | 16.75 |  | 0.37 | 17.58 | 0.85 | 18.10 | 1.32 | 17.89 | 1.12 | 18.01 | 1.12 | 17.98 |
| 5 |  | 1.28 | 4.01 | 1.97 | 4.52 | 3.09 | 4.16 | 2.10 | 4.41 | 2.10 | 4.31 |  | 0.99 | 5.15 | 1.12 | 5.49 | 2.66 | 5.21 | 2.14 | 5.42 | 2.14 | 5.37 |
| 10 |  | 1.19 | 0.76 | 3.10 | 0.99 | 3.71 | 0.82 | 3.40 | 0.94 | 3.40 | 0.76 |  | 1.00 | 1.51 | 2.51 | 1.75 | 3.20 | 1.53 | 2.90 | 1.67 | 2.90 | 1.59 |
| 20 |  | 5.00 | 0.00 | 5.00 | 0.00 | 5.00 | 0.00 | 5.00 | 0.00 | 5.00 | 0.00 |  | 2.97 | 0.12 | 3.30 | 0.18 | 4.64 | 0.12 | 3.44 | 0.16 | 4.47 | 0.01 |
| 0.05 | (80,120) | **-2.86** | 93.61 | **-8.83** | 95.20 | **-20.37** | 95.57 | **-12.71** | 95.33 | **-12.71** | 95.33 | (120,100) | **-2.58** | 93.74 | **-14.56** | 95.02 | **-25.82** | 95.46 | **-16.88** | 95.17 | **-16.88** | 95.17 |
| 0.1 |  | -1.56 | 90.18 | **-7.47** | 91.80 | **-14.29** | 92.12 | **-7.47** | 91.89 | **-7.47** | 91.89 |  | **-2.26** | 90.31 | **-10.28** | 91.54 | **-18.68** | 91.96 | **-10.28** | 91.69 | **-10.28** | 91.69 |
| 0.2 |  | **-2.21** | 83.92 | **-2.41** | 85.47 | **-3.88** | 85.75 | **-3.67** | 85.54 | **-3.67** | 85.54 |  | -1.40 | 84.06 | **-3.75** | 85.22 | **-8.91** | 85.57 | **-8.59** | 85.35 | **-5.85** | 85.34 |
| 0.5 |  | -1.18 | 66.46 | -1.71 | 67.80 | **-3.53** | 67.97 | **-3.53** | 67.85 | **-3.53** | 67.84 |  | -1.66 | 66.88 | -1.79 | 67.87 | **-2.41** | 68.06 | **-2.40** | 67.97 | **-2.40** | 67.96 |
| 0.8 |  | -1.80 | 49.90 | -1.92 | 51.05 | **-2.11** | 51.07 | **-2.02** | 51.07 | **-2.02** | 51.05 |  | **-3.04** | 50.79 | **-3.04** | 51.62 | **-3.04** | 51.63 | **-3.04** | 51.62 | **-3.04** | 51.62 |
| 1 |  | 0.45 | 39.25 | 0.51 | 40.30 | 0.51 | 40.22 | 0.51 | 40.27 | 0.51 | 40.24 |  | -1.73 | 40.63 | -0.46 | 41.34 | -0.46 | 41.23 | -0.46 | 41.31 | -0.46 | 41.29 |
| 1.25 |  | 0.48 | 29.65 | 0.84 | 30.60 | 1.09 | 30.42 | 0.91 | 30.55 | 0.91 | 30.52 |  | -0.00 | 31.19 | -0.00 | 31.87 | 0.36 | 31.67 | -0.00 | 31.84 | -0.00 | 31.81 |
| 2 |  | 1.00 | 16.17 | 1.45 | 16.93 | 1.84 | 16.67 | 1.70 | 16.82 | 1.70 | 16.78 |  | 0.50 | 17.68 | 0.96 | 18.25 | 1.51 | 17.99 | 0.96 | 18.17 | 0.96 | 18.15 |
| 5 |  | 1.26 | 4.03 | 1.87 | 4.51 | 2.96 | 4.18 | 2.02 | 4.42 | 2.02 | 4.33 |  | 0.79 | 5.15 | 1.12 | 5.52 | 2.61 | 5.26 | 2.07 | 5.43 | 2.07 | 5.38 |
| 10 |  | 1.14 | 0.77 | 3.03 | 1.00 | 3.71 | 0.82 | 3.30 | 0.96 | 3.30 | 0.78 |  | 0.89 | 1.51 | 2.45 | 1.75 | 3.16 | 1.55 | 2.78 | 1.69 | 2.78 | 1.60 |
| 20 |  | 5.00 | 0.00 | 5.00 | 0.00 | 5.00 | 0.00 | 5.00 | 0.00 | 5.00 | 0.00 |  | 2.91 | 0.12 | 3.28 | 0.18 | 4.63 | 0.12 | 3.44 | 0.16 | 3.66 | 0.02 |
| 0.05 | (100,80) | **-4.49** | 93.18 | **-13.88** | 94.71 | **-24.86** | 95.23 | **-18.36** | 94.90 | **-18.36** | 94.90 | (120,120) | **-3.79** | 94.04 | **-12.60** | 95.22 | **-23.29** | 95.60 | **-15.33** | 95.36 | **-15.33** | 95.36 |
| 0.1 |  | -1.57 | 89.66 | **-9.71** | 91.15 | **-17.85** | 91.64 | **-13.80** | 91.32 | **-13.80** | 91.32 |  | -1.67 | 90.66 | **-8.21** | 91.83 | **-18.01** | 92.19 | **-8.21** | 91.96 | **-8.21** | 91.96 |
| 0.2 |  | -1.60 | 83.24 | **-4.08** | 84.67 | **-8.33** | 85.11 | **-8.33** | 84.84 | **-6.74** | 84.83 |  | **-2.21** | 84.48 | **-3.17** | 85.59 | **-6.57** | 85.91 | **-3.82** | 85.70 | **-3.82** | 85.70 |
| 0.5 |  | **-2.28** | 65.91 | **-2.28** | 67.08 | **-2.61** | 67.33 | **-2.28** | 67.17 | **-2.28** | 67.16 |  | -1.46 | 67.36 | -1.87 | 68.32 | **-3.53** | 68.51 | -1.96 | 68.41 | -1.96 | 68.40 |
| 0.8 |  | **-5.06** | 49.81 | -1.59 | 50.75 | -1.59 | 50.73 | -1.59 | 50.73 | -1.59 | 50.72 |  | -1.80 | 51.19 | -1.80 | 52.01 | -1.80 | 52.03 | -1.80 | 52.02 | -1.80 | 52.00 |
| 1 |  | **-2.23** | 39.65 | -0.39 | 40.42 | -0.12 | 40.29 | -0.25 | 40.37 | -0.25 | 40.31 |  | -0.32 | 40.93 | -0.32 | 41.64 | -0.32 | 41.58 | -0.32 | 41.63 | -0.32 | 41.60 |
| 1.25 |  | -0.16 | 30.23 | 0.23 | 30.93 | 0.46 | 30.79 | 0.34 | 30.89 | 0.34 | 30.85 |  | 0.19 | 31.36 | 0.54 | 32.01 | 0.65 | 31.89 | 0.57 | 31.98 | 0.57 | 31.96 |
| 2 |  | 0.26 | 16.97 | 1.16 | 17.54 | 1.57 | 17.30 | 1.26 | 17.47 | 1.26 | 17.42 |  | 0.47 | 17.81 | 1.05 | 18.30 | 1.43 | 18.09 | 1.23 | 18.24 | 1.23 | 18.22 |
| 5 |  | 0.31 | 4.67 | 2.18 | 5.08 | 2.47 | 4.75 | 2.18 | 4.99 | 2.18 | 4.93 |  | 0.88 | 5.17 | 1.12 | 5.54 | 2.50 | 5.27 | 2.03 | 5.44 | 2.03 | 5.40 |
| 10 |  | 1.37 | 1.17 | 2.41 | 1.44 | 3.72 | 1.21 | 2.61 | 1.36 | 2.61 | 1.23 |  | 0.81 | 1.51 | 2.40 | 1.75 | 3.13 | 1.55 | 2.68 | 1.69 | 2.68 | 1.60 |
| 20 |  | 5.00 | 0.00 | 5.00 | 0.00 | 5.00 | 0.00 | 4.41 | 0.01 | 5.00 | 0.00 |  | 2.94 | 0.12 | 3.27 | 0.18 | 4.62 | 0.12 | 3.43 | 0.17 | 3.65 | 0.02 |
| 0.05 | (100,100) | **-3.80** | 93.57 | **-12.61** | 95.01 | **-23.33** | 95.43 | **-15.35** | 95.16 | **-15.35** | 95.16 |  |  |  |  |  |  |  |  |  |  |  |
| 0.1 |  | **-2.26** | 90.12 | **-8.20** | 91.52 | **-18.01** | 91.94 | **-13.09** | 91.66 | **-13.09** | 91.66 |  |  |  |  |  |  |  |  |  |  |  |
| 0.2 |  | -1.17 | 83.82 | **-3.75** | 85.19 | **-6.53** | 85.52 | **-3.75** | 85.30 | **-3.75** | 85.29 |  |  |  |  |  |  |  |  |  |  |  |
| 0.5 |  | -1.66 | 66.57 | **-2.20** | 67.67 | **-2.57** | 67.86 | **-2.44** | 67.73 | **-2.44** | 67.72 |  |  |  |  |  |  |  |  |  |  |  |
| 0.8 |  | **-3.04** | 50.29 | **-3.04** | 51.27 | **-3.04** | 51.29 | **-3.04** | 51.28 | **-3.04** | 51.26 |  |  |  |  |  |  |  |  |  |  |  |
| 1 |  | -1.23 | 39.98 | -0.18 | 40.79 | -0.18 | 40.75 | -0.18 | 40.80 | -0.18 | 40.75 |  |  |  |  |  |  |  |  |  |  |  |
| 1.25 |  | 0.25 | 30.51 | 0.56 | 31.26 | 0.74 | 31.11 | 0.66 | 31.19 | 0.66 | 31.16 |  |  |  |  |  |  |  |  |  |  |  |
| 2 |  | 0.57 | 17.01 | 1.09 | 17.68 | 1.67 | 17.38 | 1.28 | 17.57 | 1.28 | 17.53 |  |  |  |  |  |  |  |  |  |  |  |
| 5 |  | 0.31 | 4.67 | 2.06 | 5.11 | 2.43 | 4.79 | 2.28 | 5.02 | 2.28 | 4.95 |  |  |  |  |  |  |  |  |  |  |  |
| 10 |  | 1.33 | 1.19 | 2.36 | 1.45 | 3.62 | 1.23 | 2.56 | 1.38 | 2.56 | 1.26 |  |  |  |  |  |  |  |  |  |  |  |
| 20 |  | 5.00 | 0.00 | 5.00 | 0.00 | 5.00 | 0.00 | 4.41 | 0.02 | 5.00 | 0.00 |  |  |  |  |  |  |  |  |  |  |  |

| *ρ* | (*n*1,*n*2) | LN0 | | LN1 | | LN2 | | LN3 | | LN4 | | (*n1* ,*n2*) | LN0 | | LN1 | | LN2 | | LN3 | | LN4 | |
| --- | --- | --- | --- | --- | --- | --- | --- | --- | --- | --- | --- | --- | --- | --- | --- | --- | --- | --- | --- | --- | --- | --- |
| 0.05 | (80,80) | 2.35 | 92.96 | 0.34 | 93.52 | **-7.11** | 94.07 | -1.71 | 93.71 | -1.71 | 93.71 | (100,120) | 1.85 | 94.03 | -0.01 | 94.39 | **-6.18** | 94.76 | -0.01 | 94.51 | -0.01 | 94.51 |
| 0.1 |  | 2.28 | 89.22 | 0.75 | 89.74 | -0.38 | 90.26 | -0.38 | 89.93 | -0.38 | 89.93 |  | 1.90 | 90.55 | 0.74 | 90.88 | -0.31 | 91.25 | -0.31 | 91.02 | -0.31 | 91.02 |
| 0.2 |  | 1.12 | 82.85 | 0.97 | 83.31 | -0.05 | 83.72 | 0.62 | 83.48 | 0.62 | 83.46 |  | 1.37 | 84.40 | 0.30 | 84.69 | -0.31 | 84.99 | 0.30 | 84.78 | 0.30 | 84.77 |
| 0.5 |  | 0.35 | 65.75 | 0.35 | 65.94 | -0.26 | 66.22 | 0.23 | 66.01 | 0.25 | 65.98 |  | -0.63 | 67.47 | 0.04 | 67.65 | -0.17 | 67.78 | 0.04 | 67.66 | 0.08 | 67.65 |
| 0.8 |  | **-3.65** | 49.96 | -0.60 | 49.96 | -0.60 | 49.96 | -0.60 | 49.96 | -0.60 | 49.93 |  | **-4.93** | 51.58 | -0.93 | 51.60 | -0.34 | 51.58 | -0.69 | 51.60 | -0.41 | 51.58 |
| 1 |  | **-5.46** | 40.02 | -1.17 | 39.89 | -0.15 | 39.73 | -1.17 | 39.86 | -0.38 | 39.78 |  | **-8.28** | 41.60 | -1.73 | 41.49 | -0.79 | 41.40 | -0.79 | 41.44 | -0.56 | 41.40 |
| 1.25 |  | **-8.93** | 31.12 | **-2.21** | 30.94 | -0.11 | 30.74 | -1.42 | 30.83 | -1.19 | 30.77 |  | **-11.54** | 32.35 | -1.76 | 32.19 | -0.58 | 31.99 | -1.29 | 32.16 | -1.29 | 32.12 |
| 2 |  | **-17.01** | 18.43 | **-3.82** | 18.09 | -0.32 | 17.65 | -1.16 | 17.91 | -1.07 | 17.83 |  | **-20.91** | 19.17 | **-4.03** | 18.86 | -0.62 | 18.56 | -1.66 | 18.73 | -1.31 | 18.68 |
| 5 |  | **-39.19** | 6.71 | **-6.39** | 6.16 | -1.05 | 5.67 | **-4.25** | 5.99 | **-2.58** | 5.81 |  | **-43.80** | 6.92 | **-7.69** | 6.47 | -0.89 | 6.08 | **-3.91** | 6.33 | **-2.57** | 6.21 |
| 10 |  | **-56.39** | 3.29 | **-11.72** | 2.71 | -1.36 | 2.15 | **-7.07** | 2.51 | **-4.31** | 2.18 |  | **-60.33** | 3.33 | **-12.94** | 2.84 | -1.90 | 2.41 | **-7.47** | 2.68 | **-3.68** | 2.46 |
| 20 |  | **-77.02** | 1.81 | -**14.80** | 1.16 | **-3.84** | 0.62 | -**8.73** | 0.96 | **-4.44** | 0.29 |  | **-79.09** | 1.75 | -**14.97** | 1.20 | -**2.48** | 0.79 | **-9.03** | 1.03 | **-6.90** | 0.59 |
| 0.05 | (80,100) | 2.18 | 93.56 | -0.22 | 94.01 | **-6.62** | 94.48 | -0.22 | 94.18 | -0.22 | 94.18 | (120,80) | 2.21 | 92.95 | 0.34 | 93.53 | **-7.06** | 94.06 | **-3.21** | 93.73 | -**3.21** | 93.73 |
| 0.1 |  | 1.93 | 89.96 | 1.01 | 90.39 | -0.16 | 90.81 | 0.45 | 90.56 | 0.45 | 90.56 |  | 2.16 | 89.23 | 0.88 | 89.76 | -0.38 | 90.29 | -0.38 | 89.95 | -0.38 | 89.95 |
| 0.2 |  | 1.58 | 83.73 | 0.79 | 84.07 | -0.58 | 84.44 | 0.50 | 84.22 | 0.50 | 84.21 |  | 1.12 | 82.90 | 1.03 | 83.38 | 0.16 | 83.81 | 0.65 | 83.53 | 0.65 | 83.53 |
| 0.5 |  | -1.00 | 66.69 | -0.57 | 66.87 | -0.57 | 67.02 | -0.57 | 66.94 | -0.54 | 66.92 |  | 0.35 | 65.94 | 0.35 | 66.12 | -0.15 | 66.39 | 0.35 | 66.23 | 0.35 | 66.22 |
| 0.8 |  | **-5.46** | 50.78 | -1.19 | 50.86 | -0.80 | 50.83 | -1.19 | 50.85 | -0.80 | 50.81 |  | 0.37 | 50.27 | 0.36 | 50.30 | 0.15 | 50.30 | 0.15 | 50.31 | 0.15 | 50.30 |
| 1 |  | **-8.93** | 40.79 | **-2.23** | 40.67 | -0.80 | 40.53 | -1.47 | 40.61 | -1.25 | 40.55 |  | -1.68 | 40.56 | -0.17 | 40.44 | 0.15 | 40.36 | -0.17 | 40.39 | 0.29 | 40.34 |
| 1.25 |  | **-12.28** | 31.66 | -1.54 | 31.41 | -0.48 | 31.22 | -1.54 | 31.35 | -0.93 | 31.29 |  | **-4.27** | 31.82 | -0.25 | 31.65 | -0.22 | 31.51 | -0.25 | 31.60 | -0.24 | 31.56 |
| 2 |  | **-21.85** | 18.71 | **-3.22** | 18.29 | -0.59 | 17.92 | **-2.38** | 18.15 | -1.96 | 18.09 |  | **-10.14** | 18.99 | -1.34 | 18.71 | -0.33 | 18.50 | -0.50 | 18.62 | -0.50 | 18.58 |
| 5 |  | **-44.87** | 6.77 | **-8.53** | 6.22 | -1.24 | 5.72 | **-4.65** | 6.04 | **-2.69** | 5.87 |  | **-28.83** | 6.91 | **-4.74** | 6.54 | -0.49 | 6.21 | **-2.53** | 6.44 | **-2.35** | 6.35 |
| 10 |  | **-61.24** | 3.32 | **-12.51** | 2.73 | -1.79 | 2.18 | **-7.36** | 2.53 | **-4.43** | 2.19 |  | **-46.60** | 3.30 | **-7.91** | 2.89 | -0.68 | 2.52 | **-4.38** | 2.75 | **-2.90** | 2.60 |
| 20 |  | **-79.58** | 1.82 | -**15.50** | 1.16 | **-3.92** | 0.64 | **-9.06** | 0.97 | **-4.70** | 0.31 |  | **-71.43** | 1.69 | **-11.65** | 1.22 | -1.98 | 0.89 | **-7.09** | 1.11 | **-4.60** | 0.81 |
| 0.05 | (80,120) | 1.95 | 94.02 | 0.92 | 94.39 | **-4.98** | 94.77 | -1.26 | 94.51 | -1.26 | 94.51 | (120,100) | 2.18 | 93.58 | -0.62 | 94.03 | **-7.51** | 94.47 | **-2.86** | 94.21 | **-2.86** | 94.21 |
| 0.1 |  | 1.83 | 90.52 | 0.89 | 90.88 | -0.31 | 91.22 | -0.31 | 90.99 | -0.31 | 90.99 |  | 1.73 | 90.02 | 1.01 | 90.42 | -0.15 | 90.87 | 0.58 | 90.57 | 0.58 | 90.57 |
| 0.2 |  | 1.35 | 84.37 | 0.30 | 84.69 | -0.45 | 84.96 | 0.30 | 84.76 | 0.30 | 84.75 |  | 1.58 | 83.79 | 0.93 | 84.15 | -0.58 | 84.52 | 0.52 | 84.31 | 0.52 | 84.31 |
| 0.5 |  | **-2.84** | 67.35 | -0.50 | 67.50 | -1.02 | 67.65 | -0.31 | 67.52 | -0.28 | 67.50 |  | 0.30 | 66.88 | 0.29 | 67.05 | -0.14 | 67.28 | 0.29 | 67.13 | 0.34 | 67.11 |
| 0.8 |  | **-8.25** | 51.36 | -1.70 | 51.33 | -0.73 | 51.30 | -0.73 | 51.31 | -0.71 | 51.28 |  | -1.69 | 51.15 | -0.19 | 51.15 | 0.11 | 51.18 | -0.19 | 51.17 | 0.15 | 51.15 |
| 1 |  | **-11.51** | 41.21 | -1.69 | 41.10 | -0.62 | 41.00 | -1.14 | 41.08 | -1.14 | 41.02 |  | **-4.27** | 41.32 | -0.46 | 41.25 | -0.46 | 41.18 | -0.46 | 41.23 | -0.46 | 41.19 |
| 1.25 |  | **-15.62** | 31.99 | **-2.84** | 31.73 | -1.60 | 31.56 | **-2.04** | 31.65 | -1.71 | 31.60 |  | **-6.08** | 32.27 | -1.87 | 32.15 | -0.06 | 32.01 | -0.51 | 32.10 | -0.35 | 32.06 |
| 2 |  | **-26.13** | 18.79 | **-5.85** | 18.42 | -0.92 | 18.12 | **-2.85** | 18.29 | **-2.11** | 18.21 |  | **-13.58** | 19.23 | **-2.68** | 18.98 | -0.17 | 18.74 | -1.33 | 18.88 | -1.05 | 18.83 |
| 5 |  | **-49.40** | 6.82 | **-10.40** | 6.27 | -1.39 | 5.75 | **-5.00** | 6.07 | **-2.78** | 5.90 |  | **-34.46** | 6.98 | **-5.50** | 6.62 | -1.47 | 6.28 | **-3.23** | 6.51 | **-2.32** | 6.42 |
| 10 |  | **-64.92** | 3.34 | **-13.14** | 2.72 | **-2.12** | 2.18 | **-7.62** | 2.53 | **-4.53** | 2.19 |  | **-52.04** | 3.31 | **-10.95** | 2.92 | -0.82 | 2.54 | **-5.81** | 2.79 | **-3.06** | 2.63 |
| 20 |  | **-81.44** | 1.84 | **-16.05** | 1.16 | **-4.14** | 0.64 | **-9.85** | 0.97 | **-4.66** | 0.30 |  | **-74.60** | 1.70 | **-13.81** | 1.24 | **-2.36** | 0.91 | **-7.81** | 1.11 | **-4.55** | 0.80 |
| 0.05 | (100,80) | 2.27 | 92.93 | -0.39 | 93.53 | **-7.05** | 94.07 | **-2.56** | 93.72 | **-2.56** | 93.72 | (120,120) | 1.77 | 94.03 | 0.82 | 94.41 | **-7.10** | 94.78 | -1.72 | 94.52 | -1.72 | 94.52 |
| 0.1 |  | 2.21 | 89.23 | 1.04 | 89.74 | -0.38 | 90.27 | -0.38 | 89.96 | -0.38 | 89.96 |  | 1.94 | 90.57 | 0.64 | 90.91 | -0.31 | 91.28 | -0.31 | 91.03 | -0.31 | 91.03 |
| 0.2 |  | 1.12 | 82.90 | 0.88 | 83.36 | -0.22 | 83.80 | 0.71 | 83.49 | 0.71 | 83.49 |  | 1.29 | 84.43 | 0.30 | 84.71 | -0.12 | 85.03 | 0.30 | 84.84 | 0.30 | 84.84 |
| 0.5 |  | 0.35 | 65.82 | 0.29 | 66.09 | 0.18 | 66.31 | 0.29 | 66.17 | 0.29 | 66.14 |  | 0.71 | 67.54 | 0.21 | 67.75 | 0.04 | 67.86 | 0.06 | 67.78 | 0.06 | 67.77 |
| 0.8 |  | -1.25 | 50.12 | -1.04 | 50.15 | -1.04 | 50.19 | -1.04 | 50.18 | -1.00 | 50.15 |  | **-3.71** | 51.77 | -0.42 | 51.77 | -0.18 | 51.81 | -0.34 | 51.79 | -0.34 | 51.78 |
| 1 |  | **-3.68** | 40.39 | -0.80 | 40.29 | -0.80 | 40.19 | -0.80 | 40.25 | -0.80 | 40.20 |  | **-5.50** | 41.82 | -1.28 | 41.77 | -0.32 | 41.67 | -1.28 | 41.74 | -0.49 | 41.70 |
| 1.25 |  | **-5.48** | 31.61 | -1.21 | 31.40 | -0.24 | 31.13 | -1.21 | 31.29 | -0.35 | 31.23 |  | **-8.98** | 32.65 | **-2.29** | 32.51 | -0.18 | 32.37 | -1.62 | 32.47 | -1.42 | 32.44 |
| 2 |  | **-12.77** | 18.73 | -1.94 | 18.45 | -0.00 | 18.12 | -1.91 | 18.37 | -1.29 | 18.31 |  | **-17.02** | 19.42 | **-3.91** | 19.13 | -0.44 | 18.93 | -1.43 | 19.06 | -1.35 | 19.02 |
| 5 |  | **-33.45** | 6.82 | **-5.01** | 6.36 | -0.53 | 5.97 | **-2.85** | 6.25 | **-2.12** | 6.14 |  | **-39.12** | 7.01 | **-6.43** | 6.65 | -1.47 | 6.32 | **-4.30** | 6.54 | **-2.66** | 6.46 |
| 10 |  | **-51.12** | 3.28 | **-10.01** | 2.80 | -1.55 | 2.38 | **-5.03** | 2.64 | **-3.18** | 2.42 |  | **-56.28** | 3.33 | **-11.60** | 2.93 | -1.32 | 2.56 | **-5.76** | 2.79 | **-3.22** | 2.64 |
| 20 |  | **-74.08** | 1.75 | -**12.85** | 1.19 | **-2.25** | 0.78 | **-7.82** | 1.03 | -**6.84** | 0.59 |  | **-76.94** | 1.71 | **-14.42** | 1.24 | -**2.43** | 0.91 | -**8.36** | 1.12 | **-4.84** | 0.81 |
| 0.05 | (100,100) | 2.18 | 93.59 | 0.78 | 94.02 | **-7.11** | 94.48 | -1.72 | 94.20 | -1.72 | 94.20 |  |  |  |  |  |  |  |  |  |  |  |
| 0.1 |  | 1.81 | 90.01 | 1.01 | 90.42 | -0.36 | 90.85 | 0.54 | 90.56 | 0.54 | 90.56 |  |  |  |  |  |  |  |  |  |  |  |
| 0.2 |  | 1.58 | 83.76 | 0.65 | 84.12 | -0.58 | 84.49 | 0.56 | 84.26 | 0.56 | 84.25 |  |  |  |  |  |  |  |  |  |  |  |
| 0.5 |  | 0.57 | 66.79 | 0.24 | 66.98 | -0.08 | 67.16 | 0.14 | 67.05 | 0.15 | 67.03 |  |  |  |  |  |  |  |  |  |  |  |
| 0.8 |  | **-3.69** | 51.03 | -0.56 | 51.02 | -0.39 | 51.02 | -0.55 | 51.01 | -0.55 | 51.00 |  |  |  |  |  |  |  |  |  |  |  |
| 1 |  | **-5.48** | 41.07 | -1.23 | 40.98 | -0.31 | 40.88 | -1.23 | 40.95 | -0.40 | 40.90 |  |  |  |  |  |  |  |  |  |  |  |
| 1.25 |  | **-8.96** | 32.07 | **-2.26** | 31.83 | -0.19 | 31.64 | -1.54 | 31.79 | -1.33 | 31.75 |  |  |  |  |  |  |  |  |  |  |  |
| 2 |  | **-17.01** | 18.96 | **-3.87** | 18.68 | -0.27 | 18.35 | -1.32 | 18.60 | -1.25 | 18.55 |  |  |  |  |  |  |  |  |  |  |  |
| 5 |  | **-39.15** | 6.88 | **-6.41** | 6.43 | -0.80 | 6.04 | **-4.28** | 6.29 | **-2.55** | 6.17 |  |  |  |  |  |  |  |  |  |  |  |
| 10 |  | **-56.32** | 3.32 | **-11.65** | 2.81 | -1.60 | 2.41 | **-5.79** | 2.67 | **-3.19** | 2.45 |  |  |  |  |  |  |  |  |  |  |  |
| 20 |  | **-76.97** | 1.75 | -**14.57** | 1.21 | -**2.24** | 0.78 | **-8.50** | 1.03 | **-6.93** | 0.59 |  |  |  |  |  |  |  |  |  |  |  |

| *ρ* | (*n*1,*n*2) | LA0 | | LA1 | | LA2 | | LA3 | | LA4 | | (*n1* ,*n2*) | LA0 | | LA1 | | LA2 | | LA3 | | LA4 | |
| --- | --- | --- | --- | --- | --- | --- | --- | --- | --- | --- | --- | --- | --- | --- | --- | --- | --- | --- | --- | --- | --- | --- |
| 0.05 | (80,80) | **-**1.71 | 93.63 | **-7.11** | 94.19 | **-15.38** | 94.73 | **-9.87** | 94.39 | **-9.87** | 94.39 | (100,120) | -0.01 | 94.54 | **-6.18** | 94.91 | **-15.78** | 95.28 | **-9.38** | 95.05 | **-9.38** | 95.05 |
| 0.1 |  | -0.38 | 90.11 | **-3.34** | 90.61 | **-13.09** | 91.14 | **-8.17** | 90.76 | **-8.17** | 90.76 |  | -0.31 | 91.17 | **-5.04** | 91.53 | **-10.71** | 91.87 | **-5.04** | 91.62 | **-5.04** | 91.62 |
| 0.2 |  | **-2.34** | 83.71 | **-2.94** | 84.18 | **-5.64** | 84.59 | **-3.04** | 84.32 | **-3.03** | 84.30 |  | **-3.83** | 85.02 | **-5.05** | 85.30 | **-5.06** | 85.61 | **-5.05** | 85.42 | **-4.15** | 85.41 |
| 0.5 |  | **-10.11** | 66.45 | -1.80 | 66.62 | **-2.28** | 66.91 | -1.80 | 66.74 | -1.47 | 66.73 |  | **-12.59** | 68.01 | **-3.03** | 68.12 | -1.59 | 68.28 | -1.57 | 68.16 | -1.57 | 68.14 |
| 0.8 |  | **-16.41** | 50.33 | **-3.65** | 50.31 | -1.42 | 50.33 | -1.42 | 50.31 | -1.42 | 50.28 |  | **-19.46** | 51.96 | **-2.06** | 51.93 | **-2.06** | 51.95 | **-2.06** | 51.96 | **-2.06** | 51.94 |
| 1 |  | **-20.02** | 40.13 | -1.17 | 39.92 | -0.15 | 39.83 | -1.17 | 39.90 | -0.38 | 39.83 |  | **-23.32** | 41.61 | -1.73 | 41.50 | -0.46 | 41.40 | -0.79 | 41.45 | -0.56 | 41.40 |
| 1.25 |  | **-24.10** | 31.00 | **-2.21** | 30.68 | 0.27 | 30.42 | -0.31 | 30.59 | -0.11 | 30.53 |  | **-27.60** | 32.16 | -0.98 | 31.93 | 0.12 | 31.77 | -0.98 | 31.89 | -0.23 | 31.85 |
| 2 |  | **-33.56** | 17.88 | -0.76 | 17.47 | 0.92 | 17.13 | 0.44 | 17.30 | 0.44 | 17.22 |  | **-37.45** | 18.71 | -0.42 | 18.41 | 0.42 | 18.12 | 0.08 | 18.29 | 0.16 | 18.24 |
| 5 |  | **-53.42** | 6.07 | -1.02 | 5.50 | 1.62 | 4.98 | 0.72 | 5.32 | 0.72 | 5.14 |  | **-57.10** | 6.39 | -1.23 | 5.94 | 0.31 | 5.56 | 0.09 | 5.81 | 0.09 | 5.70 |
| 10 |  | **-66.76** | 2.76 | -1.35 | 2.04 | 1.22 | 1.60 | 0.34 | 1.87 | 0.34 | 1.52 |  | **-69.70** | 2.86 | **-2.29** | 2.32 | 1.29 | 1.93 | -0.77 | 2.18 | -0.77 | 1.96 |
| 20 |  | **-70.34** | 1.48 | **-3.61** | 0.59 | 1.89 | 0.29 | -0.53 | 0.47 | 5.00 | 0.00 |  | **-73.20** | 1.40 | **-3.33** | 0.79 | 0.97 | 0.45 | -0.67 | 0.66 | 0.28 | 0.23 |
| 0.05 | (80,100) | **-**0.22 | 94.22 | **-6.62** | 94.65 | **-16.58** | 95.11 | **-9.95** | 94.81 | **-9.95** | 94.81 | (120,80) | 0.34 | 93.47 | **-5.12** | 94.02 | **-14.83** | 94.59 | **-9.01** | 94.23 | **-9.01** | 94.23 |
| 0.1 |  | -0.12 | 90.75 | **-5.39** | 91.19 | **-11.33** | 91.59 | **-5.45** | 91.32 | **-5.45** | 91.32 |  | -0.57 | 89.93 | **-3.91** | 90.44 | **-10.87** | 90.96 | **-7.37** | 90.63 | **-7.37** | 90.63 |
| 0.2 |  | **-4.19** | 84.49 | **-4.19** | 84.84 | **-5.63** | 85.20 | **-5.63** | 84.99 | **-4.82** | 84.98 |  | -0.10 | 83.55 | -0.91 | 84.04 | **-6.10** | 84.47 | **-6.10** | 84.20 | **-4.14** | 84.19 |
| 0.5 |  | **-13.18** | 67.30 | -1.66 | 67.45 | **-2.10** | 67.63 | -1.66 | 67.53 | -1.66 | 67.51 |  | **-5.71** | 66.45 | -0.46 | 66.69 | **-2.72** | 66.90 | -0.73 | 66.75 | -0.73 | 66.74 |
| 0.8 |  | **-20.01** | 51.13 | **-3.04** | 51.12 | **-3.04** | 51.08 | **-3.04** | 51.11 | **-3.04** | 51.07 |  | **-10.96** | 50.62 | -1.54 | 50.64 | -0.65 | 50.65 | -0.65 | 50.65 | -0.65 | 50.63 |
| 1 |  | **-24.09** | 40.80 | **-2.23** | 40.67 | -0.80 | 40.53 | -1.47 | 40.63 | -1.25 | 40.57 |  | **-13.66** | 40.67 | -1.68 | 40.59 | -0.03 | 40.43 | -0.17 | 40.53 | -0.03 | 40.48 |
| 1.25 |  | **-28.42** | 31.40 | -1.54 | 31.11 | 0.16 | 30.93 | -0.48 | 31.07 | -0.48 | 31.01 |  | **-17.10** | 31.65 | -0.22 | 31.48 | -0.22 | 31.33 | -0.22 | 31.43 | -0.22 | 31.38 |
| 2 |  | **-38.34** | 18.15 | -0.75 | 17.79 | 0.35 | 17.39 | 0.13 | 17.58 | 0.13 | 17.49 |  | **-25.33** | 18.55 | -0.33 | 18.30 | 1.03 | 18.01 | 0.50 | 18.17 | 0.70 | 18.12 |
| 5 |  | **-57.95** | 6.17 | -1.80 | 5.59 | 1.28 | 5.10 | -0.65 | 5.40 | 0.45 | 5.22 |  | **-44.71** | 6.35 | -0.18 | 5.98 | 1.12 | 5.64 | 1.00 | 5.89 | 1.01 | 5.80 |
| 10 |  | **-70.37** | 2.81 | **-2.39** | 2.10 | 1.01 | 1.64 | 0.00 | 1.93 | 0.00 | 1.60 |  | **-59.29** | 2.81 | 0.02 | 2.35 | 1.18 | 2.01 | 1.00 | 2.23 | 1.00 | 2.07 |
| 20 |  | **-73.87** | 1.50 | **-3.96** | 0.65 | 1.64 | 0.31 | -1.00 | 0.49 | 5.00 | 0.00 |  | **-62.69** | 1.31 | -0.97 | 0.80 | 2.28 | 0.52 | 0.90 | 0.67 | 1.47 | 0.36 |
| 0.05 | (80,120) | -1.26 | 94.57 | **-8.83** | 94.98 | **-16.57** | 95.35 | **-8.83** | 95.10 | **-8.83** | 95.10 | (120,100) | -0.62 | 94.09 | **-7.51** | 94.53 | **-16.88** | 94.98 | **-9.87** | 94.68 | **-9.87** | 94.68 |
| 0.1 |  | -1.87 | 91.20 | **-7.47** | 91.56 | **-14.29** | 91.92 | **-7.47** | 91.69 | **-7.47** | 91.69 |  | -1.94 | 90.65 | **-6.05** | 91.06 | **-10.28** | 91.47 | **-6.07** | 91.21 | **-6.07** | 91.21 |
| 0.2 |  | **-6.02** | 85.02 | **-6.07** | 85.33 | **-6.07** | 85.62 | **-6.07** | 85.48 | **-3.67** | 85.47 |  | -1.49 | 84.40 | -1.49 | 84.75 | **-8.59** | 85.13 | **-3.31** | 84.89 | **-3.12** | 84.88 |
| 0.5 |  | **-15.38** | 67.92 | **-3.10** | 68.07 | **-2.38** | 68.20 | **-3.10** | 68.11 | **-2.09** | 68.08 |  | **-7.94** | 67.42 | -0.81 | 67.55 | -1.89 | 67.74 | -0.84 | 67.61 | -0.84 | 67.60 |
| 0.8 |  | **-23.30** | 51.74 | **-2.37** | 51.67 | **-2.37** | 51.67 | **-2.37** | 51.68 | **-2.37** | 51.64 |  | **-13.65** | 51.49 | -1.71 | 51.48 | -1.19 | 51.49 | -1.71 | 51.49 | -1.19 | 51.47 |
| 1 |  | **-27.58** | 41.25 | -1.14 | 41.11 | -0.92 | 40.98 | -1.14 | 41.09 | -1.14 | 41.03 |  | **-17.08** | 41.41 | -0.46 | 41.27 | -0.46 | 41.23 | -0.46 | 41.26 | -0.46 | 41.22 |
| 1.25 |  | **-32.15** | 31.66 | **-2.81** | 31.48 | -0.14 | 31.24 | -0.57 | 31.40 | -0.57 | 31.34 |  | **-20.75** | 32.12 | -0.51 | 31.99 | 0.23 | 31.80 | -0.15 | 31.95 | -0.06 | 31.91 |
| 2 |  | **-42.31** | 18.29 | -0.85 | 17.95 | 0.35 | 17.55 | -0.27 | 17.76 | 0.07 | 17.68 |  | **-29.75** | 18.82 | -1.24 | 18.59 | 0.91 | 18.30 | -0.02 | 18.48 | 0.32 | 18.44 |
| 5 |  | **-61.47** | 6.21 | -1.50 | 5.63 | 1.01 | 5.16 | -0.68 | 5.47 | 0.32 | 5.29 |  | **-49.52** | 6.46 | -0.12 | 6.09 | 1.12 | 5.74 | 0.79 | 5.97 | 0.79 | 5.89 |
| 10 |  | **-73.08** | 2.84 | **-3.21** | 2.14 | 0.84 | 1.67 | -0.36 | 1.96 | -0.26 | 1.62 |  | **-63.48** | 2.86 | -0.70 | 2.41 | 1.16 | 2.08 | 0.69 | 2.29 | 0.69 | 2.14 |
| 20 |  | **-76.45** | 1.52 | -**4.51** | 0.67 | 1.34 | 0.33 | -1.57 | 0.51 | 5.00 | 0.00 |  | **-67.01** | 1.34 | -1.83 | 0.83 | 2.00 | 0.55 | -0.76 | 0.72 | -0.76 | 0.41 |
| 0.05 | (100,80) | -0.39 | 93.56 | **-7.05** | 94.12 | **-16.13** | 94.68 | **-9.33** | 94.32 | **-9.33** | 94.32 | (120,120) | -1.72 | 94.50 | **-7.10** | 94.88 | **-15.33** | 95.25 | **-9.85** | 95.01 | **-9.85** | 95.01 |
| 0.1 |  | -1.68 | 90.03 | **-5.63** | 90.51 | **-13.78** | 91.06 | **-5.64** | 90.72 | **-5.64** | 90.72 |  | -0.31 | 91.12 | **-3.36** | 91.48 | **-13.09** | 91.82 | **-8.18** | 91.60 | **-8.18** | 91.60 |
| 0.2 |  | -1.20 | 83.66 | **-2.70** | 84.11 | **-8.33** | 84.56 | **-2.71** | 84.22 | **-2.51** | 84.21 |  | **-2.36** | 84.97 | **-2.97** | 85.29 | **-5.70** | 85.57 | **-3.17** | 85.38 | **-3.16** | 85.38 |
| 0.5 |  | **-7.49** | 66.45 | -1.06 | 66.67 | -1.37 | 66.91 | -1.06 | 66.76 | -1.02 | 66.75 |  | **-10.13** | 68.06 | -1.88 | 68.19 | -1.89 | 68.32 | -1.89 | 68.24 | -1.40 | 68.23 |
| 0.8 |  | **-13.06** | 50.53 | -1.38 | 50.56 | -1.38 | 50.56 | -1.38 | 50.57 | -1.38 | 50.54 |  | **-16.42** | 52.11 | **-3.71** | 52.11 | -1.47 | 52.13 | -1.47 | 52.10 | -1.47 | 52.09 |
| 1 |  | **-16.42** | 40.52 | -0.80 | 40.36 | -0.80 | 40.24 | -0.80 | 40.36 | -0.80 | 40.30 |  | **-20.02** | 41.90 | -1.28 | 41.79 | -0.32 | 41.72 | -1.28 | 41.77 | -0.49 | 41.73 |
| 1.25 |  | **-20.04** | 31.30 | -1.21 | 31.07 | 0.26 | 30.89 | 0.17 | 31.00 | 0.18 | 30.95 |  | **-24.10** | 32.46 | **-2.21** | 32.31 | 0.19 | 32.16 | -0.18 | 32.24 | -0.18 | 32.21 |
| 2 |  | **-28.93** | 18.27 | -0.71 | 17.93 | 1.03 | 17.60 | 0.26 | 17.85 | 0.26 | 17.79 |  | **-33.54** | 19.02 | -0.86 | 18.74 | 0.75 | 18.48 | 0.25 | 18.69 | 0.27 | 18.65 |
| 5 |  | **-48.67** | 6.23 | 0.21 | 5.76 | 1.72 | 5.38 | 0.31 | 5.61 | 1.02 | 5.48 |  | **-53.36** | 6.55 | -1.07 | 6.17 | 1.08 | 5.84 | 0.60 | 6.04 | 0.60 | 5.96 |
| 10 |  | **-62.77** | 2.75 | -0.88 | 2.21 | 1.85 | 1.83 | 1.03 | 2.07 | 1.08 | 1.83 |  | **-66.68** | 2.89 | -1.30 | 2.45 | 0.96 | 2.12 | 0.43 | 2.32 | 0.43 | 2.17 |
| 20 |  | **-66.31** | 1.34 | -1.70 | 0.73 | 1.28 | 0.38 | 0.19 | 0.60 | 0.97 | 0.16 |  | **-70.22** | 1.37 | -**2.50** | 0.87 | 1.79 | 0.56 | -0.89 | 0.75 | -0.89 | 0.44 |
| 0.05 | (100,100) | -1.72 | 94.15 | **-7.11** | 94.59 | **-15.35** | 95.03 | **-9.86** | 94.76 | **-9.86** | 94.76 |  |  |  |  |  |  |  |  |  |  |  |
| 0.1 |  | 0.17 | 90.70 | **-3.35** | 91.12 | **-13.09** | 91.54 | **-8.18** | 91.29 | **-8.18** | 91.29 |  |  |  |  |  |  |  |  |  |  |  |
| 0.2 |  | **-2.35** | 84.44 | **-2.96** | 84.80 | **-5.67** | 85.17 | **-3.12** | 84.96 | **-3.11** | 84.95 |  |  |  |  |  |  |  |  |  |  |  |
| 0.5 |  | **-10.12** | 67.33 | -1.85 | 67.59 | -1.85 | 67.71 | -1.85 | 67.62 | -1.66 | 67.61 |  |  |  |  |  |  |  |  |  |  |  |
| 0.8 |  | **-16.41** | 51.34 | **-3.69** | 51.38 | -1.27 | 51.39 | -1.27 | 51.37 | -1.27 | 51.35 |  |  |  |  |  |  |  |  |  |  |  |
| 1 |  | **-20.02** | 41.12 | -1.23 | 41.01 | -0.18 | 40.91 | -1.23 | 40.98 | -0.40 | 40.93 |  |  |  |  |  |  |  |  |  |  |  |
| 1.25 |  | **-24.10** | 31.79 | **-2.26** | 31.63 | 0.23 | 31.46 | -0.37 | 31.53 | 0.01 | 31.48 |  |  |  |  |  |  |  |  |  |  |  |
| 2 |  | **-33.55** | 18.48 | -0.82 | 18.26 | 0.75 | 17.89 | 0.31 | 18.09 | 0.31 | 18.03 |  |  |  |  |  |  |  |  |  |  |  |
| 5 |  | **-53.39** | 6.31 | -1.05 | 5.87 | 1.46 | 5.46 | 0.25 | 5.72 | 0.25 | 5.60 |  |  |  |  |  |  |  |  |  |  |  |
| 10 |  | **-66.71** | 2.80 | -1.32 | 2.27 | 1.54 | 1.87 | -0.76 | 2.12 | 0.60 | 1.89 |  |  |  |  |  |  |  |  |  |  |  |
| 20 |  | **-70.27** | 1.38 | -**2.62** | 0.76 | 1.10 | 0.43 | -0.37 | 0.65 | 0.53 | 0.21 |  |  |  |  |  |  |  |  |  |  |  |

| *ρ* | *n1* | *n2* | AC0 | | AC1 | | AC2 | | AC3 | | AC4 | | AC5 | |
| --- | --- | --- | --- | --- | --- | --- | --- | --- | --- | --- | --- | --- | --- | --- |
| 0.05 | 80 | 80 | **-15.23** | 93.46 | **-21.21** | 94.16 | **-32.11** | 94.65 | **-32.11** | 94.39 | **-32.11** | 94.39 | **-17.96** | 93.93 |
| 0.1 |  |  | **-17.58** | 90.25 | **-22.79** | 90.82 | **-35.73** | 91.39 | **-26.31** | 91.05 | **-26.31** | 91.04 | **-17.47** | 90.66 |
| 0.2 |  |  | **-17.34** | 84.19 | **-20.94** | 84.71 | **-38.36** | 85.22 | **-22.85** | 84.85 | **-22.85** | 84.83 | **-20.08** | 84.59 |
| 0.5 |  |  | **-19.35** | 66.99 | **-19.49** | 67.29 | **-31.88** | 67.54 | **-20.70** | 67.40 | **-20.70** | 67.37 | **-19.76** | 67.25 |
| 0.8 |  |  | **-13.38** | 50.45 | **-14.04** | 50.53 | **-29.63** | 50.56 | **-13.02** | 50.51 | **-13.02** | 50.48 | **-13.67** | 50.51 |
| 1 |  |  | **-5.46** | 40.07 | -0.16 | 39.95 | 0.06 | 39.77 | -0.09 | 39.86 | -0.09 | 39.80 | -1.17 | 39.98 |
| 1.25 |  |  | **-27.92** | 31.25 | **-11.34** | 31.00 | **-5.66** | 30.67 | **-5.67** | 30.97 | **-2.79** | 30.89 | **-11.34** | 31.03 |
| 2 |  |  | **-31.88** | 18.38 | **-16.70** | 18.05 | **-10.72** | 17.57 | **-16.70** | 17.82 | **-6.80** | 17.73 | **-16.70** | 18.09 |
| 5 |  |  | **-29.63** | 6.22 | **-19.70** | 5.64 | **-11.40** | 5.15 | **-11.58** | 5.49 | **-8.60** | 5.30 | **-19.70** | 5.79 |
| 10 |  |  | **-25.05** | 2.59 | **-12.74** | 2.00 | **-4.01** | 1.55 | **-12.69** | 1.81 | **-4.31** | 1.51 | **-12.74** | 2.09 |
| 20 |  |  | **-37.84** | 1.13 | **-4.04** | 0.49 | **-3.61** | 0.21 | **-3.70** | 0.37 | **-3.64** | 0.08 | **-18.06** | 0.59 |
| 0.05 |  | 100 | **-16.59** | 94.03 | **-23.04** | 94.54 | **-33.40** | 94.96 | **-33.40** | 94.77 | **-33.40** | 94.77 | **-19.70** | 94.41 |
| 0.1 |  |  | **-18.73** | 90.88 | **-24.32** | 91.32 | **-36.68** | 91.79 | **-27.82** | 91.52 | **-27.82** | 91.50 | **-22.69** | 91.21 |
| 0.2 |  |  | **-21.13** | 84.89 | **-22.07** | 85.31 | **-39.05** | 85.72 | **-24.41** | 85.49 | **-24.41** | 85.49 | **-20.87** | 85.22 |
| 0.5 |  |  | **-20.27** | 67.74 | **-21.15** | 67.97 | **-33.22** | 68.19 | **-22.45** | 68.05 | **-22.45** | 68.04 | **-20.61** | 67.91 |
| 0.8 |  |  | **-16.50** | 51.14 | **-14.09** | 51.20 | **-31.21** | 51.20 | **-15.59** | 51.19 | **-15.59** | 51.17 | **-13.82** | 51.19 |
| 1 |  |  | **-8.39** | 40.67 | -0.80 | 40.50 | -0.80 | 40.39 | -0.80 | 40.46 | -0.80 | 40.40 | -0.80 | 40.53 |
| 1.25 |  |  | **-27.92** | 31.54 | **-11.34** | 31.27 | **-5.66** | 31.05 | **-11.34** | 31.15 | **-3.58** | 31.07 | **-11.34** | 31.38 |
| 2 |  |  | **-31.88** | 18.52 | **-16.70** | 18.13 | **-10.72** | 17.74 | **-16.70** | 17.99 | **-9.47** | 17.90 | **-16.70** | 18.19 |
| 5 |  |  | **-29.63** | 6.28 | **-19.70** | 5.68 | **-11.40** | 5.21 | **-11.51** | 5.51 | **-11.51** | 5.34 | **-19.70** | 5.79 |
| 10 |  |  | **-25.05** | 2.62 | **-12.72** | 1.99 | **-3.95** | 1.56 | **-12.69** | 1.82 | **-4.43** | 1.52 | **-12.72** | 2.10 |
| 20 |  |  | **-37.84** | 1.15 | **-4.09** | 0.49 | **-3.61** | 0.21 | -**3.78** | 0.38 | **-3.63** | 0.07 | -**18.06** | 0.60 |
| 0.05 |  | 120 | **-17.67** | 94.43 | **-24.46** | 94.82 | **-34.37** | 95.21 | **-34.37** | 95.04 | **-34.37** | 95.04 | **-21.00** | 94.70 |
| 0.1 |  |  | **-21.04** | 91.29 | **-23.81** | 91.70 | **-37.39** | 92.04 | **-28.96** | 91.90 | **-28.96** | 91.89 | **-22.90** | 91.59 |
| 0.2 |  |  | **-22.98** | 85.36 | **-23.34** | 85.76 | **-39.57** | 86.04 | **-25.52** | 85.87 | **-25.52** | 85.86 | **-22.16** | 85.70 |
| 0.5 |  |  | **-22.24** | 68.18 | **-21.12** | 68.47 | **-41.37** | 68.68 | **-22.13** | 68.51 | **-22.13** | 68.49 | **-20.55** | 68.43 |
| 0.8 |  |  | **-16.49** | 51.56 | **-14.21** | 51.63 | **-32.38** | 51.63 | **-16.32** | 51.63 | **-16.32** | 51.60 | **-13.92** | 51.62 |
| 1 |  |  | **-11.33** | 40.93 | -0.30 | 40.78 | -0.30 | 40.69 | -0.30 | 40.76 | -0.30 | 40.70 | -0.94 | 40.82 |
| 1.25 |  |  | **-27.92** | 31.76 | **-11.34** | 31.50 | **-11.34** | 31.27 | **-11.34** | 31.38 | **-6.18** | 31.32 | **-11.34** | 31.56 |
| 2 |  |  | **-31.88** | 18.64 | **-16.70** | 18.21 | **-16.70** | 17.85 | **-16.70** | 18.06 | **-11.13** | 17.98 | **-16.70** | 18.27 |
| 5 |  |  | **-29.63** | 6.26 | **-19.70** | 5.70 | **-11.40** | 5.21 | **-11.48** | 5.51 | **-11.48** | 5.35 | **-19.70** | 5.81 |
| 10 |  |  | **-25.05** | 2.61 | **-12.71** | 2.00 | **-4.08** | 1.56 | **-12.69** | 1.85 | **-4.53** | 1.52 | **-12.71** | 2.11 |
| 20 |  |  | **-37.84** | 1.15 | **-4.14** | 0.50 | **-3.61** | 0.22 | **-3.74** | 0.38 | **-3.62** | 0.06 | -**18.06** | 0.61 |
| 0.05 | 100 | 80 | **-15.51** | 93.50 | **-21.35** | 94.07 | **-32.11** | 94.65 | **-32.11** | 94.38 | **-32.11** | 94.38 | **-18.15** | 93.91 |
| 0.1 |  |  | **-14.10** | 90.23 | **-18.86** | 90.76 | **-35.73** | 91.38 | **-26.51** | 90.98 | **-26.51** | 90.98 | **-17.05** | 90.64 |
| 0.2 |  |  | **-18.00** | 84.20 | **-21.55** | 84.67 | **-27.92** | 85.10 | **-23.05** | 84.82 | **-23.05** | 84.81 | **-19.30** | 84.55 |
| 0.5 |  |  | **-17.04** | 67.09 | **-20.39** | 67.40 | **-24.74** | 67.64 | **-19.47** | 67.50 | **-19.47** | 67.49 | **-19.83** | 67.30 |
| 0.8 |  |  | **-15.06** | 50.78 | **-12.59** | 50.86 | **-19.70** | 50.90 | **-13.55** | 50.86 | **-13.55** | 50.85 | **-15.65** | 50.87 |
| 1 |  |  | **-8.39** | 40.67 | -0.80 | 40.50 | -0.80 | 40.39 | -0.80 | 40.46 | -0.80 | 40.40 | -0.80 | 40.53 |
| 1.25 |  |  | **-29.60** | 31.78 | **-8.14** | 31.57 | **-3.75** | 31.28 | **-8.14** | 31.45 | **-2.38** | 31.39 | **-13.91** | 31.63 |
| 2 |  |  | **-33.22** | 18.86 | **-19.21** | 18.57 | **-13.41** | 18.20 | **-13.41** | 18.45 | **-9.11** | 18.38 | **-19.21** | 18.60 |
| 5 |  |  | **-31.21** | 6.53 | **-22.12** | 6.04 | **-14.23** | 5.64 | **-14.23** | 5.92 | **-8.80** | 5.79 | **-22.12** | 6.14 |
| 10 |  |  | **-27.09** | 2.73 | **-15.61** | 2.21 | **-6.77** | 1.86 | **-15.61** | 2.09 | **-7.06** | 1.87 | **-15.61** | 2.32 |
| 20 |  |  | **-38.60** | 1.14 | **-6.98** | 0.62 | **-6.83** | 0.37 | -**6.84** | 0.51 | -**6.84** | 0.23 | -**20.78** | 0.72 |
| 0.05 |  | 100 | **-16.68** | 94.05 | **-23.20** | 94.50 | **-33.40** | 94.98 | **-23.20** | 94.67 | **-23.20** | 94.67 | **-19.84** | 94.35 |
| 0.1 |  |  | **-19.10** | 90.86 | **-20.22** | 91.29 | **-36.68** | 91.78 | **-28.03** | 91.42 | **-28.03** | 91.41 | **-18.90** | 91.17 |
| 0.2 |  |  | **-19.27** | 84.89 | **-22.18** | 85.30 | **-39.05** | 85.70 | **-24.65** | 85.42 | **-24.65** | 85.41 | **-20.23** | 85.18 |
| 0.5 |  |  | **-19.72** | 67.89 | **-20.85** | 68.10 | **-33.22** | 68.38 | **-22.47** | 68.21 | **-22.47** | 68.19 | **-20.16** | 68.06 |
| 0.8 |  |  | **-15.29** | 51.49 | **-16.23** | 51.58 | **-22.12** | 51.58 | **-15.39** | 51.58 | **-15.39** | 51.56 | **-15.52** | 51.55 |
| 1 |  |  | **-5.48** | 41.10 | -0.18 | 40.99 | -0.18 | 40.89 | -0.18 | 40.95 | -0.18 | 40.91 | -1.23 | 41.04 |
| 1.25 |  |  | **-29.60** | 32.09 | **-13.91** | 31.84 | **-8.14** | 31.69 | **-8.14** | 31.76 | **-3.44** | 31.70 | **-13.91** | 31.89 |
| 2 |  |  | **-33.22** | 19.03 | **-19.21** | 18.68 | **-13.41** | 18.38 | **-19.21** | 18.60 | **-9.40** | 18.54 | **-19.21** | 18.76 |
| 5 |  |  | **-31.21** | 6.50 | **-22.12** | 6.07 | **-14.23** | 5.68 | **-14.39** | 5.92 | **-10.98** | 5.80 | **-22.12** | 6.15 |
| 10 |  |  | **-27.09** | 2.73 | **-15.61** | 2.24 | **-6.75** | 1.86 | **-15.61** | 2.10 | **-6.96** | 1.88 | **-15.66** | 2.34 |
| 20 |  |  | **-38.60** | 1.15 | **-6.93** | 0.63 | **-6.83** | 0.36 | **-6.84** | 0.52 | **-6.84** | 0.24 | -**20.78** | 0.73 |
| 0.05 |  | 120 | **-17.98** | 94.43 | **-24.64** | 94.80 | **-34.37** | 95.22 | **-24.64** | 94.92 | **-24.64** | 94.92 | **-21.27** | 94.71 |
| 0.1 |  |  | **-20.05** | 91.29 | **-23.82** | 91.65 | **-37.39** | 92.06 | **-29.20** | 91.78 | **-29.20** | 91.78 | **-19.62** | 91.56 |
| 0.2 |  |  | **-20.19** | 85.38 | **-23.26** | 85.74 | **-39.57** | 86.06 | **-24.19** | 85.84 | **-24.19** | 85.84 | **-22.67** | 85.66 |
| 0.5 |  |  | **-22.05** | 68.41 | **-22.71** | 68.63 | **-34.22** | 68.82 | **-23.56** | 68.69 | **-23.56** | 68.68 | **-22.32** | 68.59 |
| 0.8 |  |  | **-15.44** | 51.92 | **-16.05** | 51.98 | **-32.38** | 52.01 | **-17.71** | 51.98 | **-17.71** | 51.97 | **-15.51** | 51.96 |
| 1 |  |  | **-7.77** | 41.46 | -0.46 | 41.40 | -0.46 | 41.27 | -0.46 | 41.35 | -0.46 | 41.31 | -0.79 | 41.41 |
| 1.25 |  |  | **-29.60** | 32.35 | **-13.91** | 32.09 | **-8.14** | 31.95 | **-13.91** | 32.06 | **-5.90** | 32.01 | **-13.91** | 32.15 |
| 2 |  |  | **-33.22** | 19.11 | **-19.21** | 18.78 | **-13.41** | 18.48 | **-19.21** | 18.69 | **-10.37** | 18.63 | **-19.21** | 18.85 |
| 5 |  |  | **-31.21** | 6.51 | **-22.12** | 6.07 | **-14.23** | 5.70 | **-14.35** | 5.93 | **-11.17** | 5.82 | **-22.12** | 6.17 |
| 10 |  |  | **-27.09** | 2.72 | **-15.61** | 2.25 | **-6.74** | 1.87 | **-15.61** | 2.10 | **-7.15** | 1.89 | **-15.64** | 2.33 |
| 20 |  |  | **-38.60** | 1.15 | **-7.04** | 0.64 | **-6.83** | 0.37 | -**6.83** | 0.52 | **-6.83** | 0.22 | -**20.78** | 0.73 |

| *ρ* | *n1* | *n2* | AC0 | | AC1 | | AC2 | | AC3 | | AC4 | | AC5 | |
| --- | --- | --- | --- | --- | --- | --- | --- | --- | --- | --- | --- | --- | --- | --- |
| 0.05 | 120 | 80 | **-11.03** | 93.50 | **-21.45** | 94.06 | **-32.11** | 94.65 | **-21.45** | 94.29 | **-21.45** | 94.29 | **-18.17** | 93.89 |
| 0.1 |  |  | **-14.35** | 90.26 | **-18.52** | 90.76 | **-35.73** | 91.32 | **-22.66** | 90.93 | **-22.66** | 90.93 | **-17.32** | 90.61 |
| 0.2 |  |  | **-18.47** | 84.23 | **-20.69** | 84.64 | **-27.92** | 85.08 | **-22.60** | 84.81 | **-22.60** | 84.80 | **-19.70** | 84.55 |
| 0.5 |  |  | **-17.95** | 67.21 | **-19.14** | 67.44 | **-24.97** | 67.71 | **-20.07** | 67.53 | **-20.07** | 67.52 | **-20.61** | 67.41 |
| 0.8 |  |  | **-14.24** | 51.02 | **-14.18** | 51.06 | **-19.70** | 51.10 | **-14.14** | 51.07 | **-14.14** | 51.05 | **-13.21** | 51.06 |
| 1 |  |  | **-11.33** | 40.93 | -0.30 | 40.78 | -0.30 | 40.69 | -0.30 | 40.76 | -0.30 | 40.70 | -0.94 | 40.82 |
| 1.25 |  |  | **-22.90** | 32.09 | **-10.23** | 31.90 | **-5.67** | 31.75 | **-5.67** | 31.85 | **-2.38** | 31.79 | **-10.23** | 31.96 |
| 2 |  |  | **-34.22** | 19.20 | **-15.57** | 18.91 | **-10.77** | 18.64 | **-15.57** | 18.79 | **-8.54** | 18.74 | **-21.15** | 19.05 |
| 5 |  |  | **-32.38** | 6.70 | **-16.46** | 6.32 | **-16.46** | 6.00 | **-16.46** | 6.19 | **-10.50** | 6.10 | **-23.96** | 6.44 |
| 10 |  |  | **-28.61** | 2.83 | **-17.86** | 2.43 | **-9.23** | 2.09 | **-17.86** | 2.30 | **-9.23** | 2.14 | **-17.86** | 2.51 |
| 20 |  |  | **-39.15** | 1.14 | **-9.47** | 0.72 | -1.01 | 0.47 | **-9.47** | 0.64 | **-4.47** | 0.41 | **-9.65** | 0.80 |
| 0.05 |  | 100 | **-17.04** | 94.05 | **-23.31** | 94.48 | **-33.40** | 94.99 | **-23.31** | 94.65 | **-23.31** | 94.65 | **-20.00** | 94.37 |
| 0.1 |  |  | **-16.04** | 90.87 | **-20.49** | 91.28 | **-36.68** | 91.69 | **-24.70** | 91.42 | **-24.70** | 91.42 | **-19.22** | 91.18 |
| 0.2 |  |  | **-19.81** | 84.89 | **-21.34** | 85.28 | **-29.60** | 85.62 | **-25.01** | 85.42 | **-25.01** | 85.41 | **-20.71** | 85.18 |
| 0.5 |  |  | **-18.86** | 67.97 | **-21.68** | 68.19 | **-26.65** | 68.41 | **-21.53** | 68.27 | **-21.53** | 68.26 | **-21.28** | 68.14 |
| 0.8 |  |  | **-16.69** | 51.71 | **-14.65** | 51.74 | **-22.12** | 51.78 | **-15.60** | 51.76 | **-15.60** | 51.74 | **-16.04** | 51.74 |
| 1 |  |  | **-7.77** | 41.46 | -0.46 | 41.40 | -0.46 | 41.27 | -0.46 | 41.35 | -0.46 | 41.31 | -0.79 | 41.41 |
| 1.25 |  |  | **-30.86** | 32.44 | **-10.23** | 32.26 | **-5.67** | 32.12 | **-10.23** | 32.22 | **-3.50** | 32.17 | **-15.98** | 32.30 |
| 2 |  |  | **-34.22** | 19.35 | **-21.15** | 19.11 | **-15.57** | 18.81 | **-15.57** | 18.98 | **-10.40** | 18.93 | **-21.15** | 19.17 |
| 5 |  |  | **-32.38** | 6.74 | **-23.96** | 6.37 | **-16.46** | 6.02 | **-16.46** | 6.22 | **-11.07** | 6.14 | **-23.96** | 6.44 |
| 10 |  |  | **-28.61** | 2.84 | **-17.86** | 2.42 | **-9.20** | 2.11 | **-17.86** | 2.32 | **-9.48** | 2.16 | **-17.86** | 2.52 |
| 20 |  |  | **-39.15** | 1.15 | **-9.46** | 0.74 | **-9.44** | 0.50 | -**9.46** | 0.65 | **-4.36** | 0.39 | **-9.59** | 0.81 |
| 0.05 |  | 120 | **-16.66** | 94.43 | **-21.46** | 94.78 | **-34.37** | 95.23 | **-24.76** | 94.90 | **-24.76** | 94.90 | **-21.46** | 94.69 |
| 0.1 |  |  | **-17.35** | 91.31 | **-20.69** | 91.65 | **-37.39** | 92.01 | **-29.36** | 91.78 | **-29.36** | 91.77 | **-20.69** | 91.56 |
| 0.2 |  |  | **-20.80** | 85.40 | **-22.58** | 85.73 | **-39.57** | 86.04 | **-24.70** | 85.84 | **-24.70** | 85.83 | **-21.91** | 85.66 |
| 0.5 |  |  | **-19.49** | 68.51 | **-22.00** | 68.77 | **-27.93** | 68.90 | **-23.12** | 68.81 | **-23.12** | 68.79 | **-21.69** | 68.69 |
| 0.8 |  |  | **-16.78** | 52.18 | **-15.62** | 52.24 | **-23.96** | 52.27 | **-16.81** | 52.24 | **-16.81** | 52.23 | **-17.14** | 52.22 |
| 1 |  |  | **-5.50** | 41.87 | -0.32 | 41.77 | -0.32 | 41.70 | -0.32 | 41.73 | -0.32 | 41.70 | -0.42 | 41.80 |
| 1.25 |  |  | **-30.86** | 32.70 | **-15.98** | 32.54 | **-10.23** | 32.42 | **-10.23** | 32.50 | **-4.75** | 32.46 | **-15.98** | 32.57 |
| 2 |  |  | **-34.22** | 19.49 | **-21.15** | 19.21 | **-15.57** | 18.98 | **-21.15** | 19.10 | **-11.57** | 19.06 | **-21.15** | 19.23 |
| 5 |  |  | **-32.38** | 6.74 | **-23.96** | 6.38 | **-16.46** | 6.03 | **-16.46** | 6.25 | **-10.82** | 6.16 | **-23.96** | 6.45 |
| 10 |  |  | **-28.61** | 2.83 | **-17.86** | 2.44 | **-9.18** | 2.12 | **-17.86** | 2.32 | **-9.39** | 2.17 | **-17.86** | 2.52 |
| 20 |  |  | **-39.15** | 1.17 | **-9.55** | 0.74 | -**9.44** | 0.50 | **-9.45** | 0.65 | **-4.28** | 0.40 | **-9.55** | 0.81 |

| *ρ* | *n1* | *n2* | AA0 | | AA1 | | AA2 | | AA3 | | AA4 | | AA5 | |
| --- | --- | --- | --- | --- | --- | --- | --- | --- | --- | --- | --- | --- | --- | --- |
| 0.05 | 80 | 80 | **-31.87** | 95.73 | **-47.21** | 96.51 | **-48.16** | 96.88 | **-47.35** | 96.68 | **-47.35** | 96.68 | **-47.19** | 96.39 |
| 0.1 |  |  | **-28.47** | 92.44 | **-43.85** | 93.25 | **-45.60** | 93.75 | **-44.03** | 93.43 | **-44.03** | 93.43 | **-43.80** | 93.13 |
| 0.2 |  |  | **-27.93** | 86.07 | **-32.48** | 86.77 | **-42.26** | 87.26 | **-33.23** | 86.92 | **-33.23** | 86.92 | **-30.12** | 86.56 |
| 0.5 |  |  | **-24.18** | 67.78 | **-27.43** | 68.18 | **-30.59** | 68.45 | **-27.95** | 68.31 | **-27.95** | 68.30 | **-27.23** | 68.10 |
| 0.8 |  |  | **-13.53** | 50.59 | **-14.15** | 50.68 | **-20.15** | 50.71 | **-14.86** | 50.69 | **-14.86** | 50.66 | **-13.80** | 50.66 |
| 1 |  |  | **-5.46** | 40.07 | -0.16 | 39.95 | 0.06 | 39.77 | -0.09 | 39.86 | -0.09 | 39.80 | -1.17 | 39.98 |
| 1.25 |  |  | **-27.92** | 31.37 | **-11.34** | 31.06 | **-5.67** | 30.89 | **-11.34** | 31.02 | **-2.79** | 30.93 | **-11.34** | 31.12 |
| 2 |  |  | **-31.88** | 19.05 | **-23.82** | 18.64 | **-16.70** | 18.24 | **-23.82** | 18.52 | **-11.79** | 18.41 | **-23.82** | 18.75 |
| 5 |  |  | **-40.55** | 7.59 | **-29.63** | 7.06 | **-20.77** | 6.54 | **-29.63** | 6.84 | **-20.79** | 6.69 | **-29.88** | 7.15 |
| 10 |  |  | **-39.64** | 3.98 | **-27.01** | 3.38 | **-25.12** | 2.90 | **-26.19** | 3.22 | **-26.19** | 2.97 | **-39.56** | 3.54 |
| 20 |  |  | **-48.98** | 2.27 | **-37.87** | 1.62 | **-20.44** | 1.16 | **-37.84** | 1.46 | **-23.68** | 1.04 | **-38.09** | 1.77 |
| 0.05 |  | 100 | **-33.48** | 95.95 | **-45.99** | 96.63 | **-47.16** | 96.99 | **-46.08** | 96.79 | **-46.08** | 96.79 | **-45.97** | 96.50 |
| 0.1 |  |  | **-29.06** | 92.73 | **-42.69** | 93.42 | **-44.81** | 93.88 | **-42.83** | 93.57 | **-42.83** | 93.57 | **-42.65** | 93.33 |
| 0.2 |  |  | **-28.75** | 86.47 | **-33.22** | 87.08 | **-41.47** | 87.52 | **-39.59** | 87.29 | **-39.59** | 87.28 | **-30.84** | 86.96 |
| 0.5 |  |  | **-24.92** | 68.38 | **-26.78** | 68.74 | **-33.89** | 68.99 | **-27.34** | 68.84 | **-27.34** | 68.82 | **-26.67** | 68.65 |
| 0.8 |  |  | **-14.01** | 51.22 | **-14.45** | 51.31 | **-31.21** | 51.33 | **-14.90** | 51.31 | **-14.90** | 51.29 | **-14.11** | 51.29 |
| 1 |  |  | **-8.39** | 40.67 | -0.80 | 40.50 | -0.80 | 40.39 | -0.80 | 40.46 | -0.80 | 40.40 | -0.80 | 40.53 |
| 1.25 |  |  | **-27.92** | 31.68 | **-11.34** | 31.41 | **-11.34** | 31.13 | **-11.34** | 31.32 | **-3.58** | 31.24 | **-11.34** | 31.46 |
| 2 |  |  | **-31.88** | 19.15 | **-23.82** | 18.75 | **-16.70** | 18.37 | **-23.82** | 18.64 | **-15.09** | 18.56 | **-23.82** | 18.86 |
| 5 |  |  | **-40.55** | 7.55 | **-29.78** | 7.04 | **-20.44** | 6.54 | **-29.63** | 6.83 | **-21.33** | 6.69 | **-29.78** | 7.14 |
| 10 |  |  | **-39.94** | 3.96 | **-39.56** | 3.36 | **-25.38** | 2.88 | **-26.47** | 3.18 | **-26.47** | 2.93 | **-39.56** | 3.50 |
| 20 |  |  | **-49.41** | 2.24 | **-38.02** | 1.61 | **-20.75** | 1.15 | **-37.84** | 1.43 | **-23.38** | 1.00 | **-38.32** | 1.75 |
| 0.05 |  | 120 | **-31.53** | 96.09 | **-45.03** | 96.70 | **-46.42** | 97.06 | **-45.17** | 96.85 | **-45.17** | 96.85 | **-45.02** | 96.60 |
| 0.1 |  |  | **-29.56** | 92.92 | **-41.73** | 93.56 | **-44.22** | 93.97 | **-41.97** | 93.69 | **-41.97** | 93.69 | **-41.72** | 93.44 |
| 0.2 |  |  | **-28.94** | 86.75 | **-34.27** | 87.32 | **-42.65** | 87.70 | **-38.56** | 87.48 | **-38.56** | 87.47 | **-31.62** | 87.21 |
| 0.5 |  |  | **-24.48** | 68.81 | **-26.26** | 69.14 | **-34.48** | 69.38 | **-26.79** | 69.23 | **-26.79** | 69.21 | **-26.18** | 69.06 |
| 0.8 |  |  | **-17.35** | 51.64 | **-14.02** | 51.68 | **-32.38** | 51.71 | **-15.18** | 51.69 | **-15.18** | 51.66 | **-13.88** | 51.65 |
| 1 |  |  | **-11.33** | 40.93 | -0.30 | 40.78 | -0.30 | 40.69 | -0.30 | 40.76 | -0.30 | 40.70 | -0.94 | 40.82 |
| 1.25 |  |  | **-27.92** | 31.85 | **-11.34** | 31.67 | **-11.34** | 31.37 | **-11.34** | 31.53 | **-6.19** | 31.47 | **-18.79** | 31.71 |
| 2 |  |  | **-31.88** | 19.26 | **-23.82** | 18.82 | **-17.19** | 18.49 | **-23.82** | 18.69 | **-17.19** | 18.62 | **-23.82** | 18.90 |
| 5 |  |  | **-40.55** | 7.53 | **-29.73** | 6.99 | **-29.63** | 6.54 | **-29.63** | 6.81 | **-21.74** | 6.65 | **-29.73** | 7.10 |
| 10 |  |  | **-39.84** | 3.93 | **-39.56** | 3.34 | **-25.30** | 2.84 | **-26.69** | 3.15 | **-26.69** | 2.91 | **-39.56** | 3.45 |
| 20 |  |  | **-46.11** | 2.20 | **-37.98** | 1.58 | **-20.58** | 1.12 | **-37.84** | 1.40 | **-23.21** | 0.98 | **-38.21** | 1.71 |
| 0.05 | 100 | 80 | **-33.29** | 95.80 | **-48.04** | 96.50 | **-48.78** | 96.88 | **-48.13** | 96.66 | **-48.13** | 96.66 | **-48.01** | 96.39 |
| 0.1 |  |  | **-29.10** | 92.49 | **-44.94** | 93.24 | **-45.58** | 93.73 | **-45.04** | 93.41 | **-45.04** | 93.41 | **-43.87** | 93.11 |
| 0.2 |  |  | **-29.47** | 86.11 | **-33.34** | 86.71 | **-42.71** | 87.26 | **-33.87** | 86.88 | **-33.87** | 86.88 | **-31.34** | 86.58 |
| 0.5 |  |  | **-22.25** | 67.93 | **-24.08** | 68.24 | **-28.87** | 68.57 | **-24.81** | 68.34 | **-24.81** | 68.33 | **-23.82** | 68.16 |
| 0.8 |  |  | **-15.12** | 50.94 | **-15.65** | 50.98 | **-20.25** | 51.01 | **-16.30** | 51.01 | **-16.30** | 51.00 | **-15.32** | 50.98 |
| 1 |  |  | **-8.39** | 40.67 | -0.80 | 40.50 | -0.80 | 40.39 | -0.80 | 40.46 | -0.80 | 40.40 | -0.80 | 40.53 |
| 1.25 |  |  | **-29.60** | 31.87 | **-8.14** | 31.67 | **-8.14** | 31.46 | **-8.14** | 31.59 | **-2.89** | 31.52 | **-13.91** | 31.71 |
| 2 |  |  | **-33.22** | 19.44 | **-25.86** | 19.14 | **-19.21** | 18.78 | **-19.21** | 19.04 | **-13.97** | 18.97 | **-25.86** | 19.26 |
| 5 |  |  | **-41.02** | 7.76 | **-31.21** | 7.27 | **-22.45** | 6.89 | **-31.21** | 7.18 | **-23.60** | 7.07 | **-31.21** | 7.43 |
| 10 |  |  | **-40.24** | 4.02 | **-28.57** | 3.56 | **-27.19** | 3.14 | **-27.73** | 3.40 | **-27.73** | 3.23 | **-40.13** | 3.67 |
| 20 |  |  | **-48.82** | 2.22 | **-38.64** | 1.75 | **-22.50** | 1.34 | **-38.60** | 1.59 | **-25.32** | 1.30 | **-38.92** | 1.85 |
| 0.05 |  | 100 | **-33.29** | 96.04 | **-46.88** | 96.65 | **-47.81** | 96.99 | **-47.05** | 96.78 | **-47.05** | 96.78 | **-46.85** | 96.53 |
| 0.1 |  |  | **-30.03** | 92.83 | **-43.81** | 93.43 | **-44.70** | 93.86 | **-43.92** | 93.59 | **-43.92** | 93.59 | **-43.79** | 93.35 |
| 0.2 |  |  | **-29.49** | 86.57 | **-33.25** | 87.10 | **-42.52** | 87.55 | **-33.96** | 87.27 | **-33.96** | 87.27 | **-31.39** | 86.96 |
| 0.5 |  |  | **-23.15** | 68.60 | **-27.23** | 68.91 | **-29.87** | 69.12 | **-27.68** | 68.98 | **-27.68** | 68.97 | **-27.04** | 68.85 |
| 0.8 |  |  | **-15.46** | 51.58 | **-15.77** | 51.65 | **-22.48** | 51.70 | **-17.09** | 51.66 | **-17.09** | 51.64 | **-15.52** | 51.64 |
| 1 |  |  | **-5.48** | 41.10 | -0.18 | 40.99 | -0.18 | 40.89 | -0.18 | 40.95 | -0.18 | 40.91 | -1.23 | 41.04 |
| 1.25 |  |  | **-29.60** | 32.23 | **-13.91** | 31.97 | **-8.14** | 31.77 | **-13.91** | 31.90 | **-4.63** | 31.83 | **-13.91** | 32.03 |
| 2 |  |  | **-33.22** | 19.59 | **-25.86** | 19.23 | **-19.21** | 18.98 | **-19.21** | 19.15 | **-14.39** | 19.10 | **-25.86** | 19.35 |
| 5 |  |  | **-41.02** | 7.77 | **-31.21** | 7.30 | **-22.32** | 6.91 | **-31.21** | 7.17 | **-23.14** | 7.06 | **-31.43** | 7.44 |
| 10 |  |  | **-40.20** | 4.03 | **-28.88** | 3.54 | **-27.15** | 3.15 | **-28.14** | 3.40 | **-28.14** | 3.23 | **-40.13** | 3.67 |
| 20 |  |  | **-48.82** | 2.23 | **-38.62** | 1.73 | **-23.04** | 1.33 | **-38.60** | 1.57 | **-25.40** | 1.27 | **-38.82** | 1.82 |
| 0.05 |  | 120 | **-35.05** | 96.20 | **-45.97** | 96.72 | **-47.08** | 97.05 | **-46.07** | 96.85 | **-46.07** | 96.85 | **-45.95** | 96.64 |
| 0.1 |  |  | **-30.36** | 93.05 | **-42.94** | 93.58 | **-44.94** | 93.97 | **-43.12** | 93.72 | **-43.12** | 93.72 | **-42.92** | 93.49 |
| 0.2 |  |  | **-29.45** | 86.89 | **-33.40** | 87.37 | **-41.94** | 87.74 | **-40.05** | 87.50 | **-40.05** | 87.49 | **-31.59** | 87.25 |
| 0.5 |  |  | **-25.48** | 69.08 | **-28.15** | 69.32 | **-32.19** | 69.54 | **-28.57** | 69.38 | **-28.57** | 69.36 | **-28.06** | 69.27 |
| 0.8 |  |  | **-15.92** | 52.11 | **-15.81** | 52.14 | **-24.02** | 52.18 | **-16.72** | 52.16 | **-16.72** | 52.14 | **-15.53** | 52.13 |
| 1 |  |  | **-7.77** | 41.46 | -0.46 | 41.40 | -0.46 | 41.27 | -0.46 | 41.35 | -0.46 | 41.31 | -0.79 | 41.41 |
| 1.25 |  |  | **-29.60** | 32.44 | **-13.91** | 32.22 | **-8.14** | 32.05 | **-13.91** | 32.14 | **-5.90** | 32.09 | **-13.91** | 32.26 |
| 2 |  |  | **-33.22** | 19.69 | **-25.86** | 19.36 | **-19.21** | 19.08 | **-25.86** | 19.29 | **-15.56** | 19.22 | **-25.86** | 19.42 |
| 5 |  |  | **-41.02** | 7.77 | **-31.36** | 7.32 | **-22.86** | 6.93 | **-31.21** | 7.18 | **-23.73** | 7.07 | **-31.36** | 7.41 |
| 10 |  |  | **-40.50** | 4.00 | **-40.13** | 3.53 | **-27.42** | 3.13 | **-28.47** | 3.39 | **-28.47** | 3.22 | **-40.13** | 3.63 |
| 20 |  |  | **-50.85** | 2.21 | **-38.61** | 1.69 | **-23.00** | 1.31 | **-38.60** | 1.55 | **-25.49** | 1.26 | **-39.04** | 1.82 |

| *ρ* | *n1* | *n2* | AA0 | | AA1 | | AA2 | | AA3 | | AA4 | | AA5 | |
| --- | --- | --- | --- | --- | --- | --- | --- | --- | --- | --- | --- | --- | --- | --- |
| 0.05 | 120 | 80 | **-29.77** | 95.80 | **-48.60** | 96.48 | **-49.22** | 96.88 | **-48.67** | 96.64 | **-48.67** | 96.64 | **-47.82** | 96.37 |
| 0.1 |  |  | **-29.97** | 92.51 | **-44.78** | 93.19 | **-46.20** | 93.66 | **-45.75** | 93.37 | **-45.75** | 93.37 | **-37.74** | 93.00 |
| 0.2 |  |  | **-30.59** | 86.14 | **-32.35** | 86.64 | **-40.97** | 87.20 | **-34.50** | 86.84 | **-34.50** | 86.84 | **-32.21** | 86.53 |
| 0.5 |  |  | **-22.33** | 67.98 | **-24.92** | 68.33 | **-27.44** | 68.57 | **-25.62** | 68.44 | **-25.62** | 68.43 | **-22.83** | 68.21 |
| 0.8 |  |  | **-14.25** | 51.16 | **-16.92** | 51.23 | **-19.70** | 51.26 | **-16.44** | 51.26 | **-16.44** | 51.24 | **-16.63** | 51.22 |
| 1 |  |  | **-11.33** | 40.93 | -0.30 | 40.78 | -0.30 | 40.69 | -0.30 | 40.76 | -0.30 | 40.70 | -0.94 | 40.82 |
| 1.25 |  |  | **-30.86** | 32.19 | **-10.23** | 31.99 | **-5.67** | 31.85 | **-10.23** | 31.95 | **-2.66** | 31.89 | **-10.23** | 32.04 |
| 2 |  |  | **-34.22** | 19.75 | **-21.15** | 19.47 | **-15.57** | 19.15 | **-21.15** | 19.36 | **-12.85** | 19.30 | **-27.41** | 19.55 |
| 5 |  |  | **-41.36** | 7.92 | **-32.38** | 7.49 | **-23.96** | 7.15 | **-32.38** | 7.39 | **-24.43** | 7.31 | **-32.38** | 7.61 |
| 10 |  |  | **-40.71** | 4.07 | **-29.43** | 3.67 | **-28.61** | 3.30 | **-29.43** | 3.55 | **-29.43** | 3.43 | **-40.55** | 3.76 |
| 20 |  |  | **-45.11** | 2.22 | **-39.20** | 1.81 | **-24.22** | 1.46 | **-26.48** | 1.67 | **-26.48** | 1.47 | **-39.20** | 1.89 |
| 0.05 |  | 100 | **-32.33** | 96.07 | **-47.49** | 96.62 | **-48.27** | 96.98 | **-47.63** | 96.77 | **-47.63** | 96.77 | **-47.47** | 96.53 |
| 0.1 |  |  | **-30.42** | 92.84 | **-44.64** | 93.42 | **-45.35** | 93.84 | **-44.81** | 93.57 | **-44.81** | 93.57 | **-43.73** | 93.32 |
| 0.2 |  |  | **-30.67** | 86.60 | **-33.98** | 87.07 | **-42.72** | 87.52 | **-34.34** | 87.24 | **-34.34** | 87.24 | **-32.33** | 86.98 |
| 0.5 |  |  | **-22.80** | 68.73 | **-25.33** | 68.97 | **-28.29** | 69.22 | **-25.85** | 69.03 | **-25.85** | 69.02 | **-25.09** | 68.91 |
| 0.8 |  |  | **-14.74** | 51.82 | **-17.13** | 51.87 | **-22.51** | 51.90 | **-18.30** | 51.89 | **-18.30** | 51.87 | **-16.90** | 51.87 |
| 1 |  |  | **-7.77** | 41.46 | -0.46 | 41.40 | -0.46 | 41.27 | -0.46 | 41.35 | -0.46 | 41.31 | -0.79 | 41.41 |
| 1.25 |  |  | **-30.86** | 32.55 | **-10.23** | 32.34 | **-10.23** | 32.21 | **-10.23** | 32.31 | **-3.95** | 32.26 | **-15.98** | 32.41 |
| 2 |  |  | **-34.22** | 19.92 | **-27.41** | 19.65 | **-21.15** | 19.38 | **-21.15** | 19.55 | **-15.78** | 19.50 | **-27.41** | 19.72 |
| 5 |  |  | **-41.36** | 7.91 | **-32.38** | 7.54 | **-24.24** | 7.21 | **-32.38** | 7.42 | **-25.24** | 7.35 | **-32.38** | 7.63 |
| 10 |  |  | **-40.65** | 4.08 | **-29.90** | 3.67 | **-28.70** | 3.33 | **-29.17** | 3.55 | **-29.17** | 3.43 | **-40.55** | 3.76 |
| 20 |  |  | **-47.15** | 2.21 | **-39.19** | 1.80 | **-24.35** | 1.46 | **-39.15** | 1.68 | **-26.86** | 1.46 | **-39.43** | 1.89 |
| 0.05 |  | 120 | **-34.33** | 96.24 | **-46.62** | 96.71 | **-47.56** | 97.04 | **-46.71** | 96.85 | **-46.71** | 96.85 | **-46.61** | 96.63 |
| 0.1 |  |  | **-30.71** | 93.09 | **-43.82** | 93.59 | **-44.70** | 93.93 | **-43.95** | 93.71 | **-43.95** | 93.71 | **-43.78** | 93.50 |
| 0.2 |  |  | **-30.67** | 86.94 | **-33.93** | 87.36 | **-42.08** | 87.72 | **-34.77** | 87.51 | **-34.77** | 87.50 | **-32.36** | 87.28 |
| 0.5 |  |  | **-23.82** | 69.17 | **-27.54** | 69.45 | **-29.17** | 69.62 | **-28.61** | 69.53 | **-28.61** | 69.52 | **-27.36** | 69.38 |
| 0.8 |  |  | **-17.02** | 52.32 | **-17.18** | 52.37 | **-24.27** | 52.43 | **-18.02** | 52.38 | **-18.02** | 52.37 | **-17.01** | 52.37 |
| 1 |  |  | **-5.50** | 41.87 | -0.32 | 41.77 | -0.32 | 41.70 | -0.32 | 41.73 | -0.32 | 41.70 | -0.42 | 41.80 |
| 1.25 |  |  | **-30.86** | 32.81 | **-15.98** | 32.63 | **-10.23** | 32.48 | **-10.23** | 32.60 | **-6.28** | 32.56 | **-15.98** | 32.67 |
| 2 |  |  | **-34.22** | 20.03 | **-27.41** | 19.75 | **-21.15** | 19.49 | **-21.15** | 19.67 | **-16.50** | 19.63 | **-27.41** | 19.81 |
| 5 |  |  | **-41.36** | 7.91 | **-32.38** | 7.56 | **-24.15** | 7.21 | **-32.38** | 7.44 | **-24.91** | 7.36 | **-32.59** | 7.62 |
| 10 |  |  | **-40.62** | 4.06 | **-30.28** | 3.67 | **-28.67** | 3.32 | **-29.58** | 3.55 | **-29.58** | 3.43 | **-40.55** | 3.77 |
| 20 |  |  | **-48.71** | 2.21 | **-39.18** | 1.78 | **-24.95** | 1.45 | **-39.15** | 1.67 | **-27.16** | 1.45 | **-39.36** | 1.89 |

| *ρ* | *n1* | *n2* | AE0 | | AE1 | | AE2 | | AE3 | | AE4 | | AE5 | |
| --- | --- | --- | --- | --- | --- | --- | --- | --- | --- | --- | --- | --- | --- | --- |
| 0.05 | 80 | 80 | 3.14 | 92.49 | 0.83 | 93.03 | **-7.11** | 93.60 | -1.71 | 93.26 | -1.71 | 93.26 | 0.83 | 92.91 |
| 0.1 |  |  | 1.23 | 88.93 | 0.20 | 89.44 | **-3.34** | 89.96 | **-3.31** | 89.62 | -1.36 | 89.61 | 1.18 | 89.33 |
| 0.2 |  |  | **-2.34** | 82.61 | **-2.34** | 83.04 | **-2.94** | 83.49 | -2.94 | 83.22 | -1.55 | 83.20 | **-2.34** | 82.94 |
| 0.5 |  |  | **-10.11** | 65.61 | -1.79 | 65.89 | -1.79 | 66.10 | -1.79 | 65.97 | -1.01 | 65.94 | -1.79 | 65.83 |
| 0.8 |  |  | **-3.65** | 49.95 | -0.60 | 49.95 | -0.60 | 50.02 | -0.60 | 50.01 | -0.60 | 49.98 | -0.60 | 49.93 |
| 1 |  |  | **-5.46** | 40.07 | -0.16 | 39.95 | 0.06 | 39.77 | -0.09 | 39.86 | -0.09 | 39.80 | -1.17 | 39.98 |
| 1.25 |  |  | **-8.40** | 30.80 | -0.02 | 30.62 | 0.47 | 30.36 | 0.20 | 30.51 | 0.20 | 30.45 | -0.02 | 30.64 |
| 2 |  |  | **-8.11** | 17.44 | 0.52 | 17.07 | 1.47 | 16.70 | 0.99 | 16.92 | 0.99 | 16.86 | 0.44 | 17.13 |
| 5 |  |  | **-12.35** | 5.29 | 1.99 | 4.76 | 3.23 | 4.28 | 2.62 | 4.59 | 2.62 | 4.40 | 1.01 | 4.89 |
| 10 |  |  | **-13.66** | 1.98 | 2.27 | 1.45 | 3.89 | 1.01 | 3.21 | 1.30 | 3.30 | 0.93 | 1.26 | 1.55 |
| 20 |  |  | **-15.88** | 0.87 | 2.16 | 0.26 | 5.00 | 0.00 | 3.06 | 0.12 | 5.00 | 0.00 | 1.07 | 0.37 |
| 0.05 |  | 100 | 2.66 | 93.01 | -0.22 | 93.46 | **-6.62** | 93.91 | -0.22 | 93.61 | -0.22 | 93.61 | -0.21 | 93.36 |
| 0.1 |  |  | 0.25 | 89.55 | -0.03 | 89.98 | **-5.39** | 90.40 | -0.12 | 90.11 | -0.07 | 90.10 | 0.25 | 89.85 |
| 0.2 |  |  | **-4.17** | 83.30 | -0.76 | 83.67 | **-4.19** | 84.04 | -0.76 | 83.80 | -0.76 | 83.80 | 0.36 | 83.57 |
| 0.5 |  |  | **-12.71** | 66.39 | -1.00 | 66.59 | -0.57 | 66.78 | -0.57 | 66.65 | -0.54 | 66.64 | -1.00 | 66.52 |
| 0.8 |  |  | **-5.46** | 50.57 | -0.41 | 50.63 | -0.80 | 50.70 | -0.48 | 50.65 | -0.48 | 50.63 | -1.19 | 50.62 |
| 1 |  |  | **-8.39** | 40.67 | -0.80 | 40.50 | -0.80 | 40.39 | -0.80 | 40.46 | -0.80 | 40.40 | -0.80 | 40.53 |
| 1.25 |  |  | **-12.07** | 31.12 | 0.01 | 30.93 | 0.39 | 30.69 | 0.16 | 30.85 | 0.16 | 30.79 | -0.48 | 31.02 |
| 2 |  |  | **-12.35** | 17.64 | 0.42 | 17.25 | 1.27 | 16.88 | 0.97 | 17.11 | 0.97 | 17.04 | 0.42 | 17.30 |
| 5 |  |  | **-14.22** | 5.40 | 2.04 | 4.84 | 3.14 | 4.41 | 2.39 | 4.71 | 2.39 | 4.53 | 0.87 | 4.96 |
| 10 |  |  | **-17.83** | 2.13 | 1.84 | 1.50 | 3.64 | 1.11 | 2.88 | 1.37 | 2.98 | 1.01 | 0.56 | 1.63 |
| 20 |  |  | -**19.31** | 0.90 | 1.64 | 0.31 | 5.00 | 0.00 | 2.66 | 0.18 | 5.00 | 0.00 | 0.26 | 0.42 |
| 0.05 |  | 120 | 2.17 | 93.37 | -1.26 | 93.77 | **-4.98** | 94.14 | -1.26 | 93.88 | -1.26 | 93.88 | 2.12 | 93.65 |
| 0.1 |  |  | -0.49 | 89.97 | -0.77 | 90.33 | -1.88 | 90.69 | -0.77 | 90.44 | 0.65 | 90.43 | -0.77 | 90.25 |
| 0.2 |  |  | **-4.72** | 83.82 | -0.45 | 84.12 | -1.36 | 84.41 | -0.45 | 84.22 | -0.44 | 84.21 | 0.12 | 84.03 |
| 0.5 |  |  | **-2.84** | 66.93 | -0.50 | 67.08 | -0.45 | 67.28 | -0.31 | 67.13 | -0.28 | 67.11 | -0.50 | 67.06 |
| 0.8 |  |  | **-7.75** | 51.04 | -0.73 | 51.09 | -0.16 | 51.09 | -0.10 | 51.07 | -0.10 | 51.04 | -0.73 | 51.05 |
| 1 |  |  | **-11.33** | 40.93 | -0.30 | 40.78 | -0.30 | 40.69 | -0.30 | 40.76 | -0.30 | 40.70 | -0.94 | 40.82 |
| 1.25 |  |  | **-7.10** | 31.40 | 0.03 | 31.14 | 0.39 | 30.95 | 0.28 | 31.04 | 0.28 | 31.00 | -0.03 | 31.20 |
| 2 |  |  | **-9.88** | 17.74 | 0.65 | 17.37 | 1.33 | 17.03 | 1.00 | 17.23 | 1.00 | 17.16 | 0.20 | 17.45 |
| 5 |  |  | **-15.71** | 5.49 | 1.78 | 4.93 | 2.98 | 4.49 | 2.32 | 4.78 | 2.32 | 4.60 | 0.12 | 5.06 |
| 10 |  |  | **-19.37** | 2.19 | 1.49 | 1.56 | 3.45 | 1.16 | 2.53 | 1.42 | 2.72 | 1.06 | 0.00 | 1.67 |
| 20 |  |  | -**21.05** | 0.92 | 1.10 | 0.35 | 5.00 | 0.00 | 2.40 | 0.21 | 5.00 | 0.00 | -0.22 | 0.44 |
| 0.05 | 100 | 80 | 3.28 | 92.62 | -0.39 | 93.18 | **-7.05** | 93.74 | **-2.56** | 93.39 | **-2.56** | 93.39 | -0.39 | 93.06 |
| 0.1 |  |  | 1.97 | 89.08 | -1.68 | 89.63 | **-5.63** | 90.12 | -1.68 | 89.81 | -1.68 | 89.81 | 0.58 | 89.48 |
| 0.2 |  |  | -0.87 | 82.80 | -1.20 | 83.24 | **-2.71** | 83.68 | -1.20 | 83.38 | -0.56 | 83.36 | -1.20 | 83.11 |
| 0.5 |  |  | **-7.49** | 65.90 | -0.12 | 66.07 | -1.17 | 66.40 | -1.06 | 66.19 | -1.02 | 66.18 | -0.12 | 66.04 |
| 0.8 |  |  | -1.25 | 50.29 | -1.04 | 50.35 | -1.04 | 50.36 | -1.04 | 50.35 | -1.02 | 50.34 | -1.25 | 50.36 |
| 1 |  |  | **-8.39** | 40.67 | -0.80 | 40.50 | -0.80 | 40.39 | -0.80 | 40.46 | -0.80 | 40.40 | -0.80 | 40.53 |
| 1.25 |  |  | **-5.48** | 31.43 | -0.08 | 31.16 | 0.23 | 30.96 | 0.02 | 31.08 | 0.02 | 31.05 | -0.24 | 31.24 |
| 2 |  |  | **-4.91** | 17.91 | 0.26 | 17.64 | 1.35 | 17.31 | 0.85 | 17.50 | 0.85 | 17.47 | 0.26 | 17.70 |
| 5 |  |  | **-11.30** | 5.54 | 2.16 | 5.08 | 3.15 | 4.73 | 2.60 | 4.94 | 2.60 | 4.83 | 1.42 | 5.21 |
| 10 |  |  | **-12.20** | 2.05 | 2.66 | 1.64 | 4.07 | 1.27 | 3.42 | 1.49 | 3.61 | 1.26 | 1.53 | 1.72 |
| 20 |  |  | -**12.85** | 0.81 | 2.70 | 0.34 | 4.27 | 0.10 | 3.49 | 0.26 | 5.00 | 0.00 | 1.66 | 0.42 |
| 0.05 |  | 100 | 3.13 | 93.16 | 0.82 | 93.58 | **-7.11** | 94.06 | -1.72 | 93.76 | -1.72 | 93.76 | 0.82 | 93.48 |
| 0.1 |  |  | 1.23 | 89.70 | 0.17 | 90.10 | **-3.35** | 90.52 | **-3.32** | 90.26 | -1.37 | 90.25 | 1.17 | 90.01 |
| 0.2 |  |  | **-2.35** | 83.51 | **-2.35** | 83.83 | **-2.96** | 84.23 | **-2.96** | 84.00 | -1.59 | 83.99 | **-2.35** | 83.77 |
| 0.5 |  |  | **-10.12** | 66.69 | -1.85 | 66.89 | -1.85 | 67.06 | -1.85 | 66.93 | -1.08 | 66.92 | -1.85 | 66.83 |
| 0.8 |  |  | **-3.69** | 51.03 | -0.97 | 51.06 | -0.97 | 51.08 | -0.97 | 51.06 | -0.97 | 51.04 | -0.97 | 51.07 |
| 1 |  |  | **-5.48** | 41.10 | -0.18 | 40.99 | -0.18 | 40.89 | -0.18 | 40.95 | -0.18 | 40.91 | -1.23 | 41.04 |
| 1.25 |  |  | **-8.41** | 31.70 | 0.01 | 31.53 | 0.38 | 31.39 | 0.22 | 31.48 | 0.22 | 31.43 | -0.03 | 31.57 |
| 2 |  |  | **-8.12** | 18.11 | 0.36 | 17.82 | 1.35 | 17.52 | 0.97 | 17.67 | 0.97 | 17.64 | 0.36 | 17.85 |
| 5 |  |  | **-12.33** | 5.65 | 2.03 | 5.22 | 3.05 | 4.84 | 2.41 | 5.08 | 2.41 | 4.96 | 0.98 | 5.33 |
| 10 |  |  | **-13.58** | 2.19 | 2.29 | 1.70 | 3.86 | 1.36 | 3.22 | 1.57 | 3.29 | 1.33 | 1.28 | 1.78 |
| 20 |  |  | -**15.64** | 0.88 | 2.23 | 0.37 | 4.07 | 0.15 | 3.13 | 0.29 | 5.00 | 0.00 | 1.07 | 0.44 |
| 0.05 |  | 120 | 2.75 | 93.52 | -0.01 | 93.88 | **-6.18** | 94.27 | **-3.03** | 94.03 | **-3.03** | 94.03 | -0.01 | 93.79 |
| 0.1 |  |  | 0.44 | 90.13 | 0.22 | 90.48 | **-4.98** | 90.84 | 0.22 | 90.58 | 0.33 | 90.57 | 0.28 | 90.38 |
| 0.2 |  |  | **-3.81** | 83.99 | **-3.83** | 84.28 | **-3.83** | 84.59 | **-3.83** | 84.40 | -0.33 | 84.40 | **-3.83** | 84.22 |
| 0.5 |  |  | **-12.16** | 67.21 | -0.63 | 67.38 | -0.30 | 67.54 | -0.07 | 67.42 | -0.07 | 67.42 | -0.63 | 67.36 |
| 0.8 |  |  | **-4.93** | 51.46 | -0.69 | 51.47 | -0.34 | 51.49 | -0.26 | 51.47 | -0.26 | 51.45 | -0.69 | 51.48 |
| 1 |  |  | **-7.77** | 41.46 | -0.46 | 41.40 | -0.46 | 41.27 | -0.46 | 41.35 | -0.46 | 41.31 | -0.79 | 41.41 |
| 1.25 |  |  | **-11.35** | 31.94 | 0.11 | 31.78 | 0.40 | 31.62 | 0.12 | 31.75 | 0.12 | 31.71 | -0.09 | 31.83 |
| 2 |  |  | **-11.53** | 18.26 | 0.42 | 17.95 | 1.28 | 17.68 | 0.93 | 17.85 | 0.93 | 17.81 | -0.25 | 18.04 |
| 5 |  |  | **-13.17** | 5.71 | 1.80 | 5.30 | 3.04 | 4.93 | 2.29 | 5.18 | 2.29 | 5.07 | 0.59 | 5.42 |
| 10 |  |  | **-16.57** | 2.26 | 1.99 | 1.75 | 3.68 | 1.42 | 2.88 | 1.63 | 3.02 | 1.39 | 0.72 | 1.87 |
| 20 |  |  | -**17.84** | 0.93 | 1.72 | 0.40 | 3.90 | 0.18 | 2.83 | 0.32 | 5.00 | 0.00 | 0.60 | 0.46 |

| *ρ* | *n1* | *n2* | AE0 | | AE1 | | AE2 | | AE3 | | AE4 | | AE5 | |
| --- | --- | --- | --- | --- | --- | --- | --- | --- | --- | --- | --- | --- | --- | --- |
| 0.05 | 120 | 80 | 2.21 | 92.77 | -1.33 | 93.30 | **-9.01** | 93.86 | **-3.21** | 93.49 | **-3.21** | 93.49 | 0.49 | 93.16 |
| 0.1 |  |  | 2.46 | 89.21 | -0.57 | 89.73 | **-7.37** | 90.24 | **-3.90** | 89.91 | **-3.90** | 89.91 | -0.57 | 89.61 |
| 0.2 |  |  | -0.10 | 82.93 | -0.63 | 83.37 | **-6.10** | 83.81 | -0.91 | 83.54 | -0.90 | 83.53 | -0.63 | 83.23 |
| 0.5 |  |  | **-5.65** | 66.10 | -0.27 | 66.30 | -1.40 | 66.55 | -0.48 | 66.39 | -0.48 | 66.38 | -0.27 | 66.26 |
| 0.8 |  |  | **-10.96** | 50.60 | -0.29 | 50.56 | -0.70 | 50.63 | -0.31 | 50.58 | -0.31 | 50.56 | -0.29 | 50.57 |
| 1 |  |  | **-11.33** | 40.93 | -0.30 | 40.78 | -0.30 | 40.69 | -0.30 | 40.76 | -0.30 | 40.70 | -0.94 | 40.82 |
| 1.25 |  |  | **-3.22** | 31.73 | -0.22 | 31.62 | -0.22 | 31.45 | -0.22 | 31.59 | -0.22 | 31.54 | -0.22 | 31.65 |
| 2 |  |  | **-9.49** | 18.28 | 0.54 | 18.04 | 1.12 | 17.80 | 0.80 | 17.96 | 0.80 | 17.92 | 0.24 | 18.12 |
| 5 |  |  | **-7.52** | 5.72 | 2.08 | 5.36 | 3.13 | 5.04 | 2.57 | 5.25 | 2.57 | 5.17 | 1.56 | 5.45 |
| 10 |  |  | **-10.14** | 2.16 | 2.73 | 1.78 | 4.09 | 1.48 | 3.55 | 1.66 | 3.68 | 1.50 | 1.91 | 1.85 |
| 20 |  |  | -**10.36** | 0.82 | 3.11 | 0.36 | 4.42 | 0.19 | 3.79 | 0.30 | 5.00 | 0.00 | 2.23 | 0.46 |
| 0.05 |  | 100 | 3.22 | 93.25 | -0.62 | 93.71 | **-7.51** | 94.15 | **-2.86** | 93.86 | **-2.86** | 93.86 | 1.49 | 93.58 |
| 0.1 |  |  | 1.84 | 89.81 | -1.96 | 90.23 | **-6.07** | 90.65 | -1.97 | 90.39 | -1.97 | 90.39 | 1.14 | 90.12 |
| 0.2 |  |  | -1.12 | 83.62 | -1.49 | 83.98 | **-3.31** | 84.34 | -1.49 | 84.11 | -0.37 | 84.10 | -1.49 | 83.89 |
| 0.5 |  |  | **-7.94** | 66.84 | -0.33 | 67.06 | -0.80 | 67.23 | -0.33 | 67.10 | -0.33 | 67.09 | -0.33 | 67.02 |
| 0.8 |  |  | -1.71 | 51.29 | -0.19 | 51.30 | -0.42 | 51.31 | -0.19 | 51.29 | -0.16 | 51.27 | -0.19 | 51.30 |
| 1 |  |  | **-7.77** | 41.46 | -0.46 | 41.40 | -0.46 | 41.27 | -0.46 | 41.35 | -0.46 | 41.31 | -0.79 | 41.41 |
| 1.25 |  |  | **-6.08** | 32.09 | -0.06 | 31.98 | -0.00 | 31.87 | -0.00 | 31.95 | -0.00 | 31.91 | -0.15 | 32.01 |
| 2 |  |  | **-5.25** | 18.49 | 0.75 | 18.21 | 0.96 | 18.01 | 0.92 | 18.16 | 0.92 | 18.12 | -0.02 | 18.29 |
| 5 |  |  | **-12.22** | 5.84 | 2.11 | 5.47 | 3.01 | 5.16 | 2.50 | 5.38 | 2.50 | 5.29 | 1.10 | 5.58 |
| 10 |  |  | **-13.19** | 2.27 | 2.64 | 1.83 | 3.91 | 1.56 | 3.36 | 1.73 | 3.38 | 1.57 | 1.57 | 1.92 |
| 20 |  |  | -**13.81** | 0.88 | 2.60 | 0.45 | 4.23 | 0.23 | 3.43 | 0.33 | 5.00 | 0.00 | 1.75 | 0.53 |
| 0.05 |  | 120 | 3.13 | 93.62 | 0.82 | 94.00 | **-7.10** | 94.37 | -1.72 | 94.13 | -1.72 | 94.13 | 0.82 | 93.90 |
| 0.1 |  |  | 1.22 | 90.23 | 0.16 | 90.58 | **-3.36** | 90.93 | **-3.32** | 90.71 | -1.38 | 90.70 | 1.17 | 90.51 |
| 0.2 |  |  | **-2.35** | 84.13 | **-2.36** | 84.43 | **-2.97** | 84.72 | **-2.97** | 84.56 | -1.61 | 84.55 | **-2.35** | 84.35 |
| 0.5 |  |  | **-10.13** | 67.45 | -1.88 | 67.60 | -1.88 | 67.78 | -1.88 | 67.66 | -1.13 | 67.65 | -1.88 | 67.56 |
| 0.8 |  |  | **-3.71** | 51.80 | -0.34 | 51.78 | -0.34 | 51.81 | -0.34 | 51.79 | -0.34 | 51.78 | -0.34 | 51.78 |
| 1 |  |  | **-5.50** | 41.87 | -0.32 | 41.77 | -0.32 | 41.70 | -0.32 | 41.73 | -0.32 | 41.70 | -0.42 | 41.80 |
| 1.25 |  |  | **-8.42** | 32.38 | -0.10 | 32.25 | 0.37 | 32.09 | 0.19 | 32.19 | 0.19 | 32.16 | -0.10 | 32.27 |
| 2 |  |  | **-8.14** | 18.63 | 0.64 | 18.38 | 1.20 | 18.15 | 0.84 | 18.29 | 0.84 | 18.26 | 0.25 | 18.45 |
| 5 |  |  | **-12.32** | 5.91 | 1.88 | 5.57 | 2.91 | 5.25 | 2.27 | 5.46 | 2.27 | 5.38 | 0.95 | 5.64 |
| 10 |  |  | **-13.53** | 2.32 | 2.29 | 1.92 | 3.76 | 1.62 | 3.22 | 1.78 | 3.27 | 1.62 | 1.29 | 2.01 |
| 20 |  |  | -**15.50** | 0.90 | 2.18 | 0.50 | 4.11 | 0.25 | 3.21 | 0.38 | 3.56 | 0.04 | 1.16 | 0.58 |

**Table 2 (complete). Increase in the error (first entry) and percentage of points in the CR (second entry) for the 3 selected methods. (α=1%)**

| *ρ* | (*n*1,*n*2) | AE5 | | ZP0 | | ZA1 | | (*n1* ,*n2*) | AE5 | | ZP0 | | ZA1 | |
| --- | --- | --- | --- | --- | --- | --- | --- | --- | --- | --- | --- | --- | --- | --- |
| 0.05 | (80,80) | 0.52 | 90.52 | 0.94 | 87.38 | 0.13 | 91.77 | (100,120) | 0.65 | 91.92 | 0.94 | 89.58 | 0.22 | 93.00 |
| 0.1 |  | 0.50 | 86.54 | 0.62 | 84.50 | -0.23 | 87.93 |  | 0.50 | 88.16 | 0.62 | 86.68 | 0.07 | 89.35 |
| 0.2 |  | -0.08 | 79.65 | -0.15 | 78.52 | -0.18 | 81.10 |  | -0.53 | 81.56 | -0.05 | 80.86 | -0.12 | 82.78 |
| 0.5 |  | -0.26 | 61.76 | 0.03 | 60.80 | -0.44 | 62.75 |  | -0.25 | 64.00 | -0.11 | 63.47 | -0.46 | 64.88 |
| 0.8 |  | -0.25 | 45.69 | 0.00 | 43.45 | -0.80 | 46.06 |  | -0.10 | 47.89 | -0.10 | 46.02 | -0.76 | 48.22 |
| 1 |  | -0.08 | 35.99 | -0.08 | 33.70 | -0.08 | 35.74 |  | -0.17 | 37.93 | 0.01 | 35.61 | -0.17 | 37.78 |
| 1.25 |  | -0.13 | 27.01 | 0.07 | 25.36 | 0.05 | 26.81 |  | -0.07 | 28.62 | -0.03 | 27.27 | 0.07 | 28.48 |
| 2 |  | 0.12 | 14.27 | 0.22 | 13.26 | 0.12 | 14.51 |  | -0.06 | 15.41 | 0.11 | 14.55 | 0.13 | 15.59 |
| 5 |  | 0.26 | 3.28 | 0.47 | 2.26 | 0.18 | 3.73 |  | 0.09 | 3.87 | 0.67 | 2.70 | 0.15 | 4.25 |
| 10 |  | 0.30 | 0.73 | 1.00 | 0.00 | -0.16 | 0.99 |  | 0.19 | 1.04 | 1.00 | 0.07 | 0.01 | 1.24 |
| 20 |  | 1.00 | 0.00 | 1.00 | 0.00 | -0.65 | 0.03 |  | 0.18 | 0.11 | 1.00 | 0.00 | -0.06 | 0.17 |
| 0.05 | (80,100) | 0.64 | 91.20 | 0.93 | 88.89 | 0.12 | 92.40 | (120,80) | 0.63 | 90.93 | 0.98 | 86.64 | -0.32 | 92.19 |
| 0.1 |  | 0.44 | 87.35 | 0.54 | 85.96 | -0.00 | 88.66 |  | 0.54 | 86.95 | 0.79 | 83.87 | -0.23 | 88.31 |
| 0.2 |  | -0.28 | 80.59 | -0.12 | 80.08 | -0.15 | 81.92 |  | 0.30 | 80.11 | 0.13 | 78.27 | -0.20 | 81.44 |
| 0.5 |  | -0.04 | 62.79 | -0.11 | 62.32 | -0.47 | 63.79 |  | 0.05 | 62.41 | -0.03 | 61.32 | -0.30 | 63.35 |
| 0.8 |  | -0.08 | 46.62 | -0.02 | 44.55 | -0.90 | 47.00 |  | -0.10 | 46.67 | -0.03 | 44.61 | -0.31 | 46.95 |
| 1 |  | -0.26 | 36.67 | -0.02 | 34.30 | -0.01 | 36.40 |  | -0.18 | 37.18 | 0.04 | 34.69 | -0.18 | 36.95 |
| 1.25 |  | -0.14 | 27.51 | 0.04 | 25.95 | 0.09 | 27.25 |  | -0.03 | 28.42 | 0.03 | 26.80 | -0.10 | 28.25 |
| 2 |  | -0.20 | 14.48 | 0.08 | 13.57 | 0.17 | 14.61 |  | 0.09 | 15.55 | 0.11 | 14.87 | -0.09 | 15.93 |
| 5 |  | 0.11 | 3.41 | 0.47 | 2.20 | 0.20 | 3.69 |  | 0.38 | 3.95 | 0.42 | 3.43 | -0.12 | 4.72 |
| 10 |  | 0.11 | 0.82 | 1.00 | 0.00 | -0.13 | 0.92 |  | 0.53 | 1.01 | 0.96 | 0.37 | -0.12 | 1.60 |
| 20 |  | 1.00 | 0.00 | 1.00 | 0.00 | 1.00 | 0.00 |  | 0.69 | 0.10 | 1.00 | 0.00 | -0.70 | 0.38 |
| 0.05 | (80,120) | 0.51 | 91.72 | 0.90 | 89.95 | 0.28 | 92.86 | (120,100) | 0.65 | 91.60 | 0.95 | 88.18 | -0.15 | 92.73 |
| 0.1 |  | 0.40 | 87.92 | 0.53 | 86.96 | 0.12 | 89.23 |  | 0.34 | 87.76 | 0.76 | 85.35 | -0.03 | 88.97 |
| 0.2 |  | 0.14 | 81.27 | -0.08 | 81.03 | -0.14 | 82.61 |  | 0.20 | 81.05 | 0.15 | 79.62 | -0.18 | 82.28 |
| 0.5 |  | -0.35 | 63.58 | -0.08 | 63.12 | -0.61 | 64.58 |  | -0.29 | 63.52 | -0.06 | 62.66 | -0.30 | 64.36 |
| 0.8 |  | -0.24 | 47.31 | -0.03 | 45.29 | -0.92 | 47.69 |  | -0.24 | 47.66 | -0.09 | 45.87 | -0.58 | 47.98 |
| 1 |  | -0.18 | 37.18 | 0.04 | 34.69 | -0.18 | 36.95 |  | -0.17 | 37.93 | 0.01 | 35.61 | -0.17 | 37.78 |
| 1.25 |  | -0.10 | 27.81 | 0.03 | 26.26 | 0.08 | 27.50 |  | -0.25 | 28.90 | 0.04 | 27.40 | 0.01 | 28.76 |
| 2 |  | -0.11 | 14.69 | 0.08 | 13.62 | 0.08 | 14.74 |  | 0.03 | 15.78 | 0.08 | 15.13 | -0.05 | 16.14 |
| 5 |  | -0.02 | 3.49 | 0.74 | 2.12 | 0.21 | 3.66 |  | 0.28 | 4.08 | 0.43 | 3.32 | -0.14 | 4.72 |
| 10 |  | -0.06 | 0.87 | 1.00 | 0.00 | -0.07 | 0.85 |  | 0.41 | 1.08 | 0.96 | 0.29 | -0.02 | 1.55 |
| 20 |  | 1.00 | 0.00 | 1.00 | 0.00 | 1.00 | 0.00 |  | 0.51 | 0.16 | 1.00 | 0.00 | -0.61 | 0.34 |
| 0.05 | (100,80) | 0.69 | 90.76 | 0.96 | 86.96 | -0.07 | 92.01 | (120,120) | 0.52 | 92.08 | 0.97 | 89.28 | 0.06 | 93.13 |
| 0.1 |  | 0.40 | 86.76 | 0.76 | 84.10 | -0.23 | 88.13 |  | 0.49 | 88.33 | 0.62 | 86.41 | 0.01 | 89.48 |
| 0.2 |  | 0.03 | 79.94 | -0.15 | 78.43 | -0.18 | 81.29 |  | -0.09 | 81.76 | -0.05 | 80.66 | -0.11 | 82.90 |
| 0.5 |  | -0.37 | 62.16 | -0.06 | 61.24 | -0.28 | 63.06 |  | -0.29 | 64.31 | 0.03 | 63.43 | -0.33 | 65.08 |
| 0.8 |  | -0.03 | 46.25 | -0.04 | 44.20 | -0.41 | 46.58 |  | -0.28 | 48.36 | 0.01 | 46.44 | -0.53 | 48.61 |
| 1 |  | -0.26 | 36.67 | -0.02 | 34.30 | -0.01 | 36.40 |  | -0.12 | 38.49 | 0.16 | 35.88 | -0.03 | 38.26 |
| 1.25 |  | -0.07 | 27.85 | 0.04 | 26.22 | -0.00 | 27.66 |  | -0.19 | 29.25 | 0.06 | 27.73 | 0.05 | 29.10 |
| 2 |  | 0.14 | 14.96 | 0.09 | 14.30 | -0.02 | 15.32 |  | 0.08 | 15.99 | 0.19 | 15.09 | 0.07 | 16.24 |
| 5 |  | 0.39 | 3.65 | 0.41 | 2.96 | 0.06 | 4.31 |  | 0.23 | 4.20 | 0.44 | 3.20 | -0.14 | 4.70 |
| 10 |  | 0.45 | 0.83 | 0.97 | 0.17 | -0.08 | 1.33 |  | 0.31 | 1.17 | 0.97 | 0.23 | 0.03 | 1.51 |
| 20 |  | 1.00 | 0.00 | 1.00 | 0.00 | -0.42 | 0.24 |  | 0.36 | 0.20 | 1.00 | 0.00 | -0.55 | 0.29 |
| 0.05 | (100,100) | 0.52 | 91.43 | 0.95 | 88.49 | -0.15 | 92.59 |  |  |  |  |  |  |  |
| 0.1 |  | 0.49 | 87.59 | 0.66 | 85.59 | -0.00 | 88.83 |  |  |  |  |  |  |  |
| 0.2 |  | -0.08 | 80.87 | -0.12 | 79.81 | -0.14 | 82.13 |  |  |  |  |  |  |  |
| 0.5 |  | -0.28 | 63.24 | -0.13 | 62.62 | -0.44 | 64.09 |  |  |  |  |  |  |  |
| 0.8 |  | -0.27 | 47.27 | 0.02 | 45.15 | -0.61 | 47.59 |  |  |  |  |  |  |  |
| 1 |  | -0.08 | 37.37 | 0.03 | 35.00 | 0.01 | 37.17 |  |  |  |  |  |  |  |
| 1.25 |  | -0.16 | 28.28 | 0.08 | 26.69 | 0.04 | 28.11 |  |  |  |  |  |  |  |
| 2 |  | 0.02 | 15.23 | 0.06 | 14.53 | 0.10 | 15.46 |  |  |  |  |  |  |  |
| 5 |  | 0.24 | 3.78 | 0.43 | 2.80 | 0.15 | 4.27 |  |  |  |  |  |  |  |
| 10 |  | 0.31 | 0.97 | 1.00 | 0.10 | -0.06 | 1.28 |  |  |  |  |  |  |  |
| 20 |  | 0.37 | 0.05 | 1.00 | 0.00 | -0.22 | 0.21 |  |  |  |  |  |  |  |

**(α=10%)**

| *ρ* | (*n*1,*n*2) | AE5 | | ZP0 | | ZA1 | | (*n1* ,*n2*) | AE5 | | ZP0 | | ZA1 | |
| --- | --- | --- | --- | --- | --- | --- | --- | --- | --- | --- | --- | --- | --- | --- |
| 0.05 | (80,80) | 0.62 | 94.07 | 7.56 | 91.63 | **-4.87** | 94.86 | (100,120) | -1.18 | 94.74 | 6.85 | 92.96 | -2.73 | 95.39 |
| 0.1 |  | 1.05 | 90.67 | 4.49 | 88.95 | -3.20 | 91.53 |  | -0.04 | 91.49 | 3.95 | 90.25 | -2.08 | 92.22 |
| 0.2 |  | -0.65 | 84.59 | -0.66 | 83.46 | -1.90 | 85.44 |  | -0.06 | 85.58 | -0.67 | 84.83 | -1.26 | 86.26 |
| 0.5 |  | -0.19 | 67.86 | 0.50 | 66.97 | -1.36 | 68.43 |  | -0.24 | 69.08 | -0.31 | 68.60 | -1.76 | 69.56 |
| 0.8 |  | -0.53 | 52.16 | -0.03 | 50.86 | -2.17 | 52.37 |  | -1.52 | 53.38 | -0.27 | 52.26 | -2.13 | 53.52 |
| 1 |  | -2.21 | 42.16 | 1.06 | 40.05 | -0.51 | 42.04 |  | -0.99 | 43.29 | 0.18 | 41.71 | -0.99 | 43.25 |
| 1.25 |  | -0.34 | 32.62 | 0.03 | 31.60 | -0.33 | 32.57 |  | -0.30 | 33.60 | -0.14 | 32.71 | 0.17 | 33.54 |
| 2 |  | 0.80 | 18.76 | 0.72 | 18.14 | 0.72 | 18.98 |  | 0.51 | 19.47 | 0.06 | 19.01 | 0.33 | 19.62 |
| 5 |  | 2.42 | 5.85 | -0.06 | 5.21 | -0.06 | 6.22 |  | 1.09 | 6.31 | 1.62 | 5.52 | 0.72 | 6.58 |
| 10 |  | 2.14 | 2.16 | 5.84 | 1.28 | 0.32 | 2.44 |  | 1.29 | 2.44 | 6.64 | 1.43 | 0.77 | 2.66 |
| 20 |  | 1.34 | 0.61 | 10.00 | 0.00 | -0.75 | 0.81 |  | 0.92 | 0.82 | 9.41 | 0.02 | -1.83 | 0.91 |
| 0.05 | (80,100) | 1.64 | 94.36 | 7.18 | 92.54 | -2.80 | 95.12 | (120,80) | -2.06 | 94.26 | 8.16 | 91.26 | **-7.90** | 94.95 |
| 0.1 |  | -0.39 | 91.10 | 2.74 | 89.79 | -2.39 | 91.90 |  | -2.37 | 90.90 | 4.62 | 88.56 | **-5.87** | 91.65 |
| 0.2 |  | -0.64 | 85.08 | 0.82 | 84.28 | -3.14 | 85.89 |  | -1.29 | 84.84 | 1.17 | 83.29 | -2.16 | 85.56 |
| 0.5 |  | -1.01 | 68.46 | -0.13 | 67.89 | -1.48 | 69.03 |  | -2.36 | 68.26 | -0.93 | 67.49 | -2.36 | 68.71 |
| 0.8 |  | -2.22 | 52.67 | -0.14 | 51.49 | -3.43 | 52.85 |  | -0.70 | 52.74 | -0.02 | 51.44 | -1.30 | 52.86 |
| 1 |  | -0.61 | 42.53 | 0.02 | 40.94 | -0.61 | 42.48 |  | -2.80 | 42.84 | 0.29 | 41.15 | -2.80 | 42.77 |
| 1.25 |  | -0.68 | 32.93 | -0.05 | 31.90 | 0.12 | 32.88 |  | -0.78 | 33.44 | -0.14 | 32.48 | -0.81 | 33.44 |
| 2 |  | 0.52 | 18.92 | -0.93 | 18.51 | 0.79 | 19.04 |  | 0.51 | 19.54 | 0.39 | 19.11 | 0.09 | 19.78 |
| 5 |  | 1.84 | 5.98 | -0.06 | 5.17 | -0.14 | 6.25 |  | 2.47 | 6.36 | -0.19 | 6.07 | -0.19 | 6.84 |
| 10 |  | 1.24 | 2.22 | 6.16 | 1.17 | 0.25 | 2.42 |  | 3.19 | 2.42 | 5.16 | 1.88 | 0.37 | 2.89 |
| 20 |  | 0.28 | 0.64 | 10.00 | 0.00 | -0.46 | 0.78 |  | 3.55 | 0.77 | 8.36 | 0.21 | -0.07 | 1.09 |
| 0.05 | (80,120) | 0.02 | 94.60 | 6.16 | 93.17 | -2.41 | 95.35 | (120,100) | -0.17 | 94.57 | 7.18 | 92.14 | **-4.87** | 95.23 |
| 0.1 |  | -2.24 | 91.35 | 2.86 | 90.39 | -1.76 | 92.14 |  | -1.07 | 91.30 | 4.44 | 89.48 | -2.39 | 92.01 |
| 0.2 |  | -1.07 | 85.44 | -0.67 | 84.92 | -1.50 | 86.20 |  | -3.59 | 85.33 | 1.25 | 84.08 | -3.91 | 86.02 |
| 0.5 |  | -0.37 | 68.88 | 0.20 | 68.29 | -2.09 | 69.40 |  | **-5.42** | 68.82 | -0.09 | 68.11 | -1.74 | 69.27 |
| 0.8 |  | -0.27 | 53.04 | -0.20 | 51.90 | -3.48 | 53.22 |  | -2.83 | 53.26 | -0.19 | 52.15 | -2.85 | 53.41 |
| 1 |  | -2.80 | 42.84 | 0.29 | 41.15 | -2.80 | 42.77 |  | -0.99 | 43.29 | 0.18 | 41.71 | -0.99 | 43.25 |
| 1.25 |  | -0.10 | 33.08 | 0.00 | 32.11 | 0.05 | 33.04 |  | -0.33 | 33.70 | -0.50 | 32.80 | -0.14 | 33.69 |
| 2 |  | 0.75 | 19.01 | -0.93 | 18.57 | 0.73 | 19.12 |  | 0.46 | 19.70 | -0.14 | 19.37 | 0.03 | 19.94 |
| 5 |  | 1.32 | 6.04 | 2.44 | 5.08 | -0.11 | 6.21 |  | 1.77 | 6.45 | -0.19 | 6.00 | -0.19 | 6.86 |
| 10 |  | 0.53 | 2.28 | 6.34 | 1.08 | 0.19 | 2.40 |  | 2.65 | 2.50 | 5.46 | 1.79 | 0.43 | 2.87 |
| 20 |  | -0.53 | 0.70 | 10.00 | 0.00 | -0.28 | 0.74 |  | 2.26 | 0.81 | 9.59 | 0.14 | 0.08 | 1.06 |
| 0.05 | (100,80) | -2.05 | 94.14 | 8.16 | 91.41 | **-6.61** | 94.92 | (120,120) | 0.62 | 94.80 | 7.60 | 92.79 | **-4.74** | 95.42 |
| 0.1 |  | -0.64 | 90.81 | 4.62 | 88.74 | **-4.71** | 91.61 |  | 0.94 | 91.56 | 4.54 | 90.12 | -3.21 | 92.25 |
| 0.2 |  | -3.33 | 84.71 | -0.66 | 83.41 | -3.33 | 85.50 |  | -0.71 | 85.68 | -0.67 | 84.80 | -1.58 | 86.31 |
| 0.5 |  | **-4.78** | 68.12 | -0.93 | 67.41 | -1.29 | 68.61 |  | -0.39 | 69.24 | -0.68 | 68.80 | -1.76 | 69.67 |
| 0.8 |  | -1.63 | 52.48 | 0.01 | 51.20 | -1.63 | 52.67 |  | -0.74 | 53.61 | -0.12 | 52.56 | -1.66 | 53.76 |
| 1 |  | -0.61 | 42.53 | 0.02 | 40.94 | -0.61 | 42.48 |  | -2.26 | 43.64 | -1.00 | 42.46 | -1.00 | 43.59 |
| 1.25 |  | -2.22 | 33.11 | -0.08 | 32.12 | -0.08 | 33.06 |  | -0.50 | 33.93 | -0.07 | 33.06 | 0.08 | 33.92 |
| 2 |  | 0.87 | 19.18 | 0.07 | 18.82 | 0.22 | 19.45 |  | 0.81 | 19.81 | -0.54 | 19.55 | 0.46 | 19.99 |
| 5 |  | 2.15 | 6.15 | 1.24 | 5.68 | 0.87 | 6.60 |  | 2.41 | 6.52 | -0.19 | 5.97 | -0.19 | 6.86 |
| 10 |  | 2.33 | 2.32 | 4.21 | 1.61 | 1.11 | 2.66 |  | 2.20 | 2.57 | 5.63 | 1.72 | 0.45 | 2.85 |
| 20 |  | 2.38 | 0.75 | 9.27 | 0.10 | -1.84 | 0.95 |  | 1.67 | 0.87 | 9.65 | 0.11 | 0.16 | 1.05 |
| 0.05 | (100,100) | 0.62 | 94.47 | 7.18 | 92.30 | -2.96 | 95.19 |  |  |  |  |  |  |  |
| 0.1 |  | 0.98 | 91.21 | 2.74 | 89.66 | -3.20 | 91.95 |  |  |  |  |  |  |  |
| 0.2 |  | -0.69 | 85.21 | 1.25 | 84.16 | -3.14 | 85.94 |  |  |  |  |  |  |  |
| 0.5 |  | -0.31 | 68.67 | -0.25 | 68.07 | -1.60 | 69.12 |  |  |  |  |  |  |  |
| 0.8 |  | -0.66 | 52.99 | -0.20 | 51.88 | -2.85 | 53.16 |  |  |  |  |  |  |  |
| 1 |  | -2.23 | 42.98 | 1.05 | 41.04 | -0.48 | 42.90 |  |  |  |  |  |  |  |
| 1.25 |  | -0.44 | 33.40 | -0.14 | 32.47 | 0.07 | 33.37 |  |  |  |  |  |  |  |
| 2 |  | 0.83 | 19.37 | -0.08 | 18.98 | 0.33 | 19.55 |  |  |  |  |  |  |  |
| 5 |  | 2.42 | 6.24 | 1.49 | 5.59 | 0.94 | 6.60 |  |  |  |  |  |  |  |
| 10 |  | 2.18 | 2.36 | 4.24 | 1.53 | 1.15 | 2.67 |  |  |  |  |  |  |  |
| 20 |  | 1.55 | 0.78 | 9.37 | 0.05 | -1.84 | 0.92 |  |  |  |  |  |  |  |

**Table 3 (a) (complete). Number of failures (*F*), the average increase in the error (****) and the average % of points in the CR (****) for the one-tailed test methods.**

**(*α* = 5%)**

| *Method* | *F* |  |  | *Method* | *F* |  |  |
| --- | --- | --- | --- | --- | --- | --- | --- |
| ZP2 | 0 | 1.87 | 42.46 | LN4 | 31 | -1.46 | 44.24 |
| ZP0 | 0 | 1.93 | 42.35 | ZA2 | 31 | -0.93 | 44.26 |
| ZP3 | 0 | 1.94 | 42.42 | ZN2 | 32 | -6.38 | 44.34 |
| ZP1 | 0 | 1.96 | 42.39 | ZE2 | 32 | -4.48 | 44.33 |
| ZP4 | 0 | 1.96 | 42.39 | ZC4 | 32 | -3.01 | 44.27 |
| ZA1 | 3 | -0.58 | 44.27 | ZA0 | 33 | -2.73 | 44.31 |
| AE5 | 4 | 0.03 | 43.86 | LN3 | 33 | -2.20 | 44.34 |
| AE1 | 4 | 0.24 | 43.85 | ZC2 | 34 | -4.44 | 44.33 |
| AE4 | 5 | 0.54 | 43.77 | LA2 | 34 | -3.06 | 44.38 |
| ZW2 | 6 | -0.55 | 44.17 | LW1 | 38 | -1.70 | 44.20 |
| ZW4 | 10 | -0.71 | 44.10 | LN1 | 39 | -3.43 | 44.35 |
| AE3 | 12 | 0.17 | 43.84 | LW3 | 42 | -2.38 | 44.22 |
| ZA3 | 13 | -0.60 | 44.27 | LW4 | 42 | -2.30 | 44.18 |
| ZA4 | 13 | -0.39 | 44.19 | LW2 | 43 | -3.60 | 44.24 |
| ZW3 | 14 | -0.85 | 44.19 | LA1 | 47 | -2.55 | 44.40 |
| LN2 | 18 | -1.33 | 44.31 | ZW0 | 51 | -13.95 | 44.27 |
| AE2 | 25 | -0.38 | 43.84 | LN0 | 60 | -18.46 | 44.41 |
| LW0 | 27 | -0.47 | 43.35 | AE0 | 76 | -7.19 | 43.90 |
| ZE0 | 28 | -1.71 | 44.35 | LA0 | 78 | -27.20 | 44.49 |
| ZW1 | 28 | -1.47 | 44.20 | AC2 | 89 | -19.06 | 44.59 |
| ZN3 | 29 | -5.70 | 44.33 | AA5 | 90 | -28.46 | 45.64 |
| ZN1 | 29 | -5.49 | 44.34 | AA1 | 90 | -27.78 | 45.63 |
| ZN0 | 29 | -2.94 | 44.34 | AA3 | 90 | -27.29 | 45.62 |
| ZE1 | 29 | -2.63 | 44.33 | AA2 | 90 | -26.41 | 45.63 |
| ZC0 | 29 | -1.74 | 44.36 | AA4 | 90 | -24.20 | 45.55 |
| ZN4 | 30 | -5.54 | 44.72 | AC5 | 90 | -16.57 | 44.60 |
| ZE3 | 30 | -3.23 | 44.33 | AC3 | 90 | -16.28 | 44.59 |
| ZE4 | 30 | -2.94 | 44.27 | AC1 | 90 | -15.98 | 44.60 |
| ZC1 | 30 | -2.70 | 44.33 | AC4 | 90 | -13.85 | 44.51 |
| ZC3 | 31 | -2.91 | 44.46 | AA0 | 99 | -30.09 | 45.63 |
| LA3 | 31 | -2.28 | 44.39 | AC0 | 99 | -23.16 | 44.64 |
| LA4 | 31 | -1.88 | 44.30 |  |  |  |  |
